# Supplementary material
Source: publisher site journal article supplement (https://www.dovepress.com/get_supplementary_file.php?f=214217.xlsx)
Supplement: Supplementary file 1 [file get_supplementary_file.php]

## Sheet: Parkinson's Disease
Unused	% Cov (95)	Peptides(95%)	Accession No.	Uniprot ID	Protein Name
327.15	90.8	1803	P02768	ALBU_HUMAN	Serum albumin OS=Homo sapiens GN=ALB PE=1 SV=2
4	94.5	1592	F6KPG5	F6KPG5_HUMAN	Albumin (Fragment) OS=Homo sapiens PE=2 SV=1
4	88.5	1306	Q56G89	Q56G89_HUMAN	Serum albumin OS=Homo sapiens PE=2 SV=1
142.37	73.5	370	P02787	TRFE_HUMAN	Serotransferrin OS=Homo sapiens GN=TF PE=1 SV=3
6	74	351	B4E1B2	B4E1B2_HUMAN	cDNA FLJ53691, highly similar to Serotransferrin OS=Homo sapiens PE=2 SV=1
80.06	74.2	326	Q6N089	Q6N089_HUMAN	Putative uncharacterized protein DKFZp686P15220 OS=Homo sapiens GN=DKFZp686P15220 PE=1 SV=1
2.07	68.8	325	Q6GMX6	Q6GMX6_HUMAN	IGH@ protein OS=Homo sapiens GN=IGH@ PE=1 SV=1
2.02	71.7	323	Q6MZV7	Q6MZV7_HUMAN	Putative uncharacterized protein DKFZp686C11235 OS=Homo sapiens GN=DKFZp686C11235 PE=1 SV=1
6.07	64.6	263	Q6N094	Q6N094_HUMAN	Putative uncharacterized protein DKFZp686O01196 OS=Homo sapiens GN=DKFZp686O01196 PE=1 SV=1
2.01	62.9	261	Q7Z351	Q7Z351_HUMAN	Putative uncharacterized protein DKFZp686N02209 OS=Homo sapiens GN=DKFZp686N02209 PE=2 SV=1
31.64	70	253	Q6N093	Q6N093_HUMAN	Putative uncharacterized protein DKFZp686I04196 (Fragment) OS=Homo sapiens GN=DKFZp686I04196 PE=1 SV=1
11.95	80.4	228	P01861	IGHG4_HUMAN	Ig gamma-4 chain C region OS=Homo sapiens GN=IGHG4 PE=1 SV=1
100.07	78.2	222	E9KL23	E9KL23_HUMAN	Epididymis secretory sperm binding protein Li 44a OS=Homo sapiens PE=2 SV=1
0.23	78.8	220	P01859	IGHG2_HUMAN	Ig gamma-2 chain C region OS=Homo sapiens GN=IGHG2 PE=1 SV=2
190.9	68.3	217	P01024	CO3_HUMAN	Complement C3 OS=Homo sapiens GN=C3 PE=1 SV=2
0.51	64.2	217	Q6MZU6	Q6MZU6_HUMAN	Putative uncharacterized protein DKFZp686C15213 OS=Homo sapiens GN=DKFZp686C15213 PE=1 SV=1
32.54	52.5	215	Q6GMX0	Q6GMX0_HUMAN	Uncharacterized protein OS=Homo sapiens PE=2 SV=1
0.05	56.4	211	Q6PIL8	Q6PIL8_HUMAN	IGK@ protein OS=Homo sapiens GN=IGK@ PE=1 SV=1
1.34	44.5	208	Q7Z3Y4	Q7Z3Y4_HUMAN	Uncharacterized protein OS=Homo sapiens PE=1 SV=1
2	76.4	203	B4DI57	B4DI57_HUMAN	cDNA FLJ54111, highly similar to Serotransferrin OS=Homo sapiens PE=2 SV=1
140.11	63.1	170	P01023	A2MG_HUMAN	Alpha-2-macroglobulin OS=Homo sapiens GN=A2M PE=1 SV=3
14.9	54.1	161	Q5EBM2	Q5EBM2_HUMAN	Uncharacterized protein OS=Homo sapiens PE=2 SV=1
2	57.1	156	Q6N030	Q6N030_HUMAN	Putative uncharacterized protein DKFZp686I15212 OS=Homo sapiens GN=DKFZp686I15212 PE=1 SV=1
20.09	67.6	146	D1MGQ2	D1MGQ2_HUMAN	Alpha-2 globin chain OS=Homo sapiens GN=HBA2 PE=2 SV=1
6	49.6	118	P0C0L4	CO4A_HUMAN	Complement C4-A OS=Homo sapiens GN=C4A PE=1 SV=2
144.01	50.9	116	P0C0L5	CO4B_HUMAN	Complement C4-B OS=Homo sapiens GN=C4B PE=1 SV=2
0.29	54.5	114	A8K008	A8K008_HUMAN	cDNA FLJ78387 OS=Homo sapiens PE=2 SV=1
45.31	51.9	108	Q6N096	Q6N096_HUMAN	Putative uncharacterized protein DKFZp686I15196 OS=Homo sapiens GN=DKFZp686I15196 PE=2 SV=1
31.46	79	106	P41222	PTGDS_HUMAN	Prostaglandin-H2 D-isomerase OS=Homo sapiens GN=PTGDS PE=1 SV=1
63.26	87.3	102	P02647	APOA1_HUMAN	Apolipoprotein A-I OS=Homo sapiens GN=APOA1 PE=1 SV=1
158.46	22	94	C0JYY2	C0JYY2_HUMAN	Apolipoprotein B (Including Ag(X) antigen) OS=Homo sapiens GN=APOB PE=4 SV=1
51.41	67.3	89	P02790	HEMO_HUMAN	Hemopexin OS=Homo sapiens GN=HPX PE=1 SV=2
42.69	46.1	84	P10909	CLUS_HUMAN	Clusterin OS=Homo sapiens GN=CLU PE=1 SV=1
56.44	71.7	79	P00738	HPT_HUMAN	Haptoglobin OS=Homo sapiens GN=HP PE=1 SV=1
35.28	95.2	73	D9YZU5	D9YZU5_HUMAN	Hemoglobin, beta OS=Homo sapiens GN=HBB PE=2 SV=1
22.66	53.2	72	Q8N5F4	Q8N5F4_HUMAN	IGL@ protein OS=Homo sapiens GN=IGL@ PE=1 SV=1
22.77	55.7	66	Q6PJF2	Q6PJF2_HUMAN	IGK@ protein OS=Homo sapiens GN=IGK@ PE=1 SV=1
28.62	79.6	64	E9KL36	E9KL36_HUMAN	Epididymis tissue sperm binding protein Li 4a OS=Homo sapiens PE=2 SV=1
6.13	45.1	64	Q6PIK1	Q6PIK1_HUMAN	IGL@ protein OS=Homo sapiens GN=IGL@ PE=2 SV=1
2	45.1	63	Q6GMW4	Q6GMW4_HUMAN	IGL@ protein OS=Homo sapiens GN=IGL@ PE=2 SV=1
39.96	65.9	60	P02649	APOE_HUMAN	Apolipoprotein E OS=Homo sapiens GN=APOE PE=1 SV=1
76.91	48.9	60	A5PL27	A5PL27_HUMAN	CP protein OS=Homo sapiens GN=CP PE=2 SV=1
20.24	43.7	59	Q6MZX7	Q6MZX7_HUMAN	Putative uncharacterized protein DKFZp686M24218 OS=Homo sapiens GN=DKFZp686M24218 PE=1 SV=1
21.42	50.3	56	P02763	A1AG1_HUMAN	Alpha-1-acid glycoprotein 1 OS=Homo sapiens GN=ORM1 PE=1 SV=1
23.75	63.7	54	P01034	CYTC_HUMAN	Cystatin-C OS=Homo sapiens GN=CST3 PE=1 SV=1
47.62	62.4	52	Q96K68	Q96K68_HUMAN	cDNA FLJ14473 fis, clone MAMMA1001080, highly similar to Homo sapiens SNC73 protein (SNC73) mRNA OS=Homo sapiens PE=2 SV=1
0.54	26.5	51	Q569I7	Q569I7_HUMAN	Uncharacterized protein OS=Homo sapiens PE=2 SV=1
8.47	84.4	48	A0N071	A0N071_HUMAN	Delta globin OS=Homo sapiens GN=HBD PE=2 SV=1
42.77	52.9	47	D6RF35	D6RF35_HUMAN	Vitamin D-binding protein OS=Homo sapiens GN=GC PE=2 SV=1
2	53.8	46	Q6N092	Q6N092_HUMAN	Putative uncharacterized protein DKFZp686K18196 (Fragment) OS=Homo sapiens GN=DKFZp686K18196 PE=1 SV=1
70.93	25.9	45	P02751	FINC_HUMAN	Fibronectin OS=Homo sapiens GN=FN1 PE=1 SV=4
37.68	52.9	45	G3V5I3	G3V5I3_HUMAN	Alpha-1-antichymotrypsin OS=Homo sapiens GN=SERPINA3 PE=2 SV=1
46.96	39.3	45	P06396	GELS_HUMAN	Gelsolin OS=Homo sapiens GN=GSN PE=1 SV=1
2	37.5	44	P08603	CFAH_HUMAN	Complement factor H OS=Homo sapiens GN=CFH PE=1 SV=4
4	89.1	44	Q4TZM4	Q4TZM4_HUMAN	Hemoglobin beta chain (Fragment) OS=Homo sapiens GN=HBB PE=3 SV=1
2	25.6	44	B7ZLE5	B7ZLE5_HUMAN	FN1 protein OS=Homo sapiens GN=FN1 PE=2 SV=1
65.62	37.5	43	A8K5T0	A8K5T0_HUMAN	cDNA FLJ75416, highly similar to Homo sapiens complement factor H (CFH), mRNA OS=Homo sapiens PE=2 SV=1
29.03	36.7	42	P01871	IGHM_HUMAN	Ig mu chain C region OS=Homo sapiens GN=IGHM PE=1 SV=3
61.28	32.9	42	B4E1Z4	B4E1Z4_HUMAN	Complement factor B OS=Homo sapiens GN=CFB PE=2 SV=1
39.58	47.4	41	P01008	ANT3_HUMAN	Antithrombin-III OS=Homo sapiens GN=SERPINC1 PE=1 SV=1
39.36	51.4	39	Q8N4S1	Q8N4S1_HUMAN	Proliferation-inducing protein 33 OS=Homo sapiens GN=SPARCL1 PE=2 SV=1
33.97	36.8	38	P05060	SCG1_HUMAN	Secretogranin-1 OS=Homo sapiens GN=CHGB PE=1 SV=2
24.19	34.9	38	Q86U78	Q86U78_HUMAN	Angiotensinogen (Serine (Or cysteine) proteinase inhibitor, clade A (Alpha-1 antiproteinase, antitrypsin), member 8) OS=Homo sapiens PE=2 SV=1
18.47	48.1	38	C9JV77	C9JV77_HUMAN	Alpha-2-HS-glycoprotein OS=Homo sapiens GN=AHSG PE=2 SV=1
8.09	49.3	37	P19652	A1AG2_HUMAN	Alpha-1-acid glycoprotein 2 OS=Homo sapiens GN=ORM2 PE=1 SV=2
31.33	34.8	37	E9KL26	E9KL26_HUMAN	Epididymis tissue protein Li 173 OS=Homo sapiens PE=2 SV=1
3.7	93.3	37	Q3LR79	Q3LR79_HUMAN	Hemoglobin beta (Fragment) OS=Homo sapiens GN=HBB PE=3 SV=1
16.47	33.5	35	C9JF17	C9JF17_HUMAN	Apolipoprotein D (Fragment) OS=Homo sapiens GN=APOD PE=2 SV=1
2	53.8	35	A0M8Q6	LAC7_HUMAN	Ig lambda-7 chain C region OS=Homo sapiens GN=IGLC7 PE=1 SV=2
4	39.6	34	B4DEA7	B4DEA7_HUMAN	cDNA FLJ58131, highly similar to Secretogranin-1 OS=Homo sapiens PE=2 SV=1
36.91	26.1	34	B7ZKJ8	B7ZKJ8_HUMAN	35 kDa inter-alpha-trypsin inhibitor heavy chain H4 OS=Homo sapiens GN=ITIH4 PE=2 SV=1
44.32	62.9	34	P06727	APOA4_HUMAN	Apolipoprotein A-IV OS=Homo sapiens GN=APOA4 PE=1 SV=3
31.39	41.5	34	D3DNU8	D3DNU8_HUMAN	Kininogen 1, isoform CRA_a OS=Homo sapiens GN=KNG1 PE=4 SV=1
29.56	43.1	34	P36955	PEDF_HUMAN	Pigment epithelium-derived factor OS=Homo sapiens GN=SERPINF1 PE=1 SV=4
4	46.1	34	Q86TT1	Q86TT1_HUMAN	Full-length cDNA clone CS0DD006YL02 of Neuroblastoma of Homo sapiens (human) OS=Homo sapiens PE=2 SV=1
44.89	38.6	33	E7EUF1	E7EUF1_HUMAN	Ectonucleotide pyrophosphatase/phosphodiesterase family member 2 OS=Homo sapiens GN=ENPP2 PE=2 SV=1
20.99	72	33	P02652	APOA2_HUMAN	Apolipoprotein A-II OS=Homo sapiens GN=APOA2 PE=1 SV=1
39.4	57.4	33	A8K1K1	A8K1K1_HUMAN	cDNA FLJ76342, highly similar to Homo sapiens carnosine dipeptidase 1 (metallopeptidase M20 family)(CNDP1), mRNA OS=Homo sapiens PE=2 SV=1
2	66.9	33	I1VZV6	I1VZV6_HUMAN	Hemoglobin alpha 1 OS=Homo sapiens GN=HBA1 PE=3 SV=1
49.2	37.2	33	F5H1A8	F5H1A8_HUMAN	Gelsolin OS=Homo sapiens GN=GSN PE=2 SV=1
9.03	56.3	32	Q9NPP6	Q9NPP6_HUMAN	Immunoglobulin heavy chain variant (Fragment) OS=Homo sapiens PE=2 SV=1
44.81	33.4	32	B3KX75	B3KX75_HUMAN	cDNA FLJ44930 fis, clone BRAMY3015549, highly similar to Neural cell adhesion molecule L1-like protein (Fragment) OS=Homo sapiens PE=2 SV=1
2	28.3	32	B4E1C2	B4E1C2_HUMAN	Kininogen 1, isoform CRA_b OS=Homo sapiens GN=KNG1 PE=2 SV=1
2	51.4	32	Q14515	SPRL1_HUMAN	SPARC-like protein 1 OS=Homo sapiens GN=SPARCL1 PE=1 SV=2
4.42	39.7	31	P00739	HPTR_HUMAN	Haptoglobin-related protein OS=Homo sapiens GN=HPR PE=1 SV=2
46.08	45.7	30	P00734	THRB_HUMAN	Prothrombin OS=Homo sapiens GN=F2 PE=1 SV=2
4.17	51.7	30	Q8NEJ1	Q8NEJ1_HUMAN	Uncharacterized protein OS=Homo sapiens PE=2 SV=1
47.44	33.4	29	A8K5A4	A8K5A4_HUMAN	cDNA FLJ76826, highly similar to Homo sapiens ceruloplasmin (ferroxidase) (CP), mRNA OS=Homo sapiens PE=2 SV=1
27.02	35.9	28	P51693-2	APLP1_HUMAN	Isoform 2 of Amyloid-like protein 1 OS=Homo sapiens GN=APLP1
34.86	57.4	27	P04217	A1BG_HUMAN	Alpha-1B-glycoprotein OS=Homo sapiens GN=A1BG PE=1 SV=4
31.26	41.8	27	B7Z549	B7Z549_HUMAN	cDNA FLJ56821, highly similar to Inter-alpha-trypsin inhibitor heavy chain H1 OS=Homo sapiens PE=2 SV=1
26.71	41.4	27	Q5UGI6	Q5UGI6_HUMAN	Serine/cysteine proteinase inhibitor clade G member 1 splice variant 2 (Fragment) OS=Homo sapiens GN=SERPING1 PE=2 SV=1
0.25	40.3	26	F5GZ08	F5GZ08_HUMAN	Amyloid-like protein 1 OS=Homo sapiens GN=APLP1 PE=2 SV=1
26.17	46	25	P10645	CMGA_HUMAN	Chromogranin-A OS=Homo sapiens GN=CHGA PE=1 SV=7
38.63	26.9	25	Q14CA1	Q14CA1_HUMAN	NRCAM protein OS=Homo sapiens GN=NRCAM PE=2 SV=1
40.06	40.4	25	P00747	PLMN_HUMAN	Plasminogen OS=Homo sapiens GN=PLG PE=1 SV=2
31.74	28.2	24	P43652	AFAM_HUMAN	Afamin OS=Homo sapiens GN=AFM PE=1 SV=1
12.04	60.4	24	P00441	SODC_HUMAN	Superoxide dismutase [Cu-Zn] OS=Homo sapiens GN=SOD1 PE=1 SV=2
16.03	36.3	24	F2YQ21	F2YQ21_HUMAN	Osteopontin-D OS=Homo sapiens PE=2 SV=1
23.96	53.1	24	Q9UBP4	DKK3_HUMAN	Dickkopf-related protein 3 OS=Homo sapiens GN=DKK3 PE=1 SV=2
4	46.4	24	Q7Z379	Q7Z379_HUMAN	Putative uncharacterized protein DKFZp686K04218 (Fragment) OS=Homo sapiens GN=DKFZp686K04218 PE=1 SV=1
0.5	51.1	24	B4DID6	B4DID6_HUMAN	cDNA FLJ52545, highly similar to Dickkopf-related protein 3 OS=Homo sapiens PE=2 SV=1
27.94	30.4	23	P05067	A4_HUMAN	Amyloid beta A4 protein OS=Homo sapiens GN=APP PE=1 SV=3
22.11	39.3	23	P25311	ZA2G_HUMAN	Zinc-alpha-2-glycoprotein OS=Homo sapiens GN=AZGP1 PE=1 SV=2
35.07	38.6	23	P02774	VTDB_HUMAN	Vitamin D-binding protein OS=Homo sapiens GN=GC PE=1 SV=1
24.15	55.2	21	D9IWP9	D9IWP9_HUMAN	Beta-2-glycoprotein I (Fragment) OS=Homo sapiens PE=2 SV=1
28.17	25.2	21	O94985-2	CSTN1_HUMAN	Isoform 2 of Calsyntenin-1 OS=Homo sapiens GN=CLSTN1
31.83	41.5	20	Q8WXD2	SCG3_HUMAN	Secretogranin-3 OS=Homo sapiens GN=SCG3 PE=1 SV=3
32.91	23.1	20	Q12860	CNTN1_HUMAN	Contactin-1 OS=Homo sapiens GN=CNTN1 PE=1 SV=1
2	33.7	20	Q6N041	Q6N041_HUMAN	Putative uncharacterized protein DKFZp686O16217 (Fragment) OS=Homo sapiens GN=DKFZp686O16217 PE=2 SV=1
16.17	48.7	20	A2KBC4	A2KBC4_HUMAN	Anti-TN-C scFv (Fragment) OS=Homo sapiens PE=2 SV=1
28.65	24.2	19	P13591	NCAM1_HUMAN	Neural cell adhesion molecule 1 OS=Homo sapiens GN=NCAM1 PE=1 SV=3
10.35	56.6	19	F5H6I0	F5H6I0_HUMAN	Beta-2-microglobulin form pI 5.3 OS=Homo sapiens GN=B2M PE=2 SV=1
27.14	28.7	18	P23142	FBLN1_HUMAN	Fibulin-1 OS=Homo sapiens GN=FBLN1 PE=1 SV=4
4.17	23	18	B1AHL2	B1AHL2_HUMAN	Fibulin-1 OS=Homo sapiens GN=FBLN1 PE=2 SV=1
29.97	11.8	18	P01031	CO5_HUMAN	Complement C5 OS=Homo sapiens GN=C5 PE=1 SV=4
20.95	44.2	18	F6SYF8	F6SYF8_HUMAN	Dickkopf-related protein 3 OS=Homo sapiens GN=DKK3 PE=2 SV=1
26.05	36.6	17	B2R8I2	B2R8I2_HUMAN	cDNA, FLJ93914, highly similar to Homo sapiens histidine-rich glycoprotein (HRG), mRNA OS=Homo sapiens PE=2 SV=1
7.86	44.4	16	P01602	KV110_HUMAN	Ig kappa chain V-I region HK102 (Fragment) OS=Homo sapiens GN=IGKV1-5 PE=4 SV=1
23.27	27.2	15	B2R6W1	B2R6W1_HUMAN	cDNA, FLJ93143, highly similar to Homo sapiens complement component 7 (C7), mRNA OS=Homo sapiens PE=2 SV=1
17.79	35.4	15	B4DI63	B4DI63_HUMAN	cDNA FLJ59205, highly similar to Mimecan OS=Homo sapiens PE=2 SV=1
24.91	21.5	15	Q5T985	Q5T985_HUMAN	Inter-alpha-trypsin inhibitor heavy chain H2 OS=Homo sapiens GN=ITIH2 PE=2 SV=1
15.18	51.2	15	Q92876	KLK6_HUMAN	Kallikrein-6 OS=Homo sapiens GN=KLK6 PE=1 SV=1
24.02	30.9	15	B4DVE1	B4DVE1_HUMAN	cDNA FLJ53478, highly similar to Galectin-3-binding protein OS=Homo sapiens PE=2 SV=1
18.28	35.1	14	O15240	VGF_HUMAN	Neurosecretory protein VGF OS=Homo sapiens GN=VGF PE=1 SV=2
17.38	21.8	14	B3KNX0	B3KNX0_HUMAN	cDNA FLJ30621 fis, clone CTONG2001681, highly similar to Complement C1s subcomponent (EC 3.4.21.42) OS=Homo sapiens PE=2 SV=1
14.7	27.7	14	P08697	A2AP_HUMAN	Alpha-2-antiplasmin OS=Homo sapiens GN=SERPINF2 PE=1 SV=3
10.06	30	14	O95502	NPTXR_HUMAN	Neuronal pentraxin receptor OS=Homo sapiens GN=NPTXR PE=2 SV=2
15.96	54.2	14	P08294	SODE_HUMAN	Extracellular superoxide dismutase [Cu-Zn] OS=Homo sapiens GN=SOD3 PE=1 SV=2
16.52	33.2	14	A8K050	A8K050_HUMAN	cDNA FLJ75376, highly similar to Homo sapiens peptidoglycan recognition protein L (PGLYRP) mRNA OS=Homo sapiens PE=2 SV=1
2	19.5	14	Q96QS0	Q96QS0_HUMAN	Putative matrix cell adhesion molecule-3 OS=Homo sapiens PE=1 SV=1
22.09	28.5	14	Q8IVC0	Q8IVC0_HUMAN	Serpin peptidase inhibitor, clade D (Heparin cofactor), member 1 OS=Homo sapiens GN=SERPIND1 PE=2 SV=1
18.42	38.4	13	F1C4A7	F1C4A7_HUMAN	Monocyte differentiation antigen CD14 OS=Homo sapiens GN=CD14 PE=3 SV=1
24.01	36.5	13	B2R815	B2R815_HUMAN	cDNA, FLJ93695, highly similar to Homo sapiens serpin peptidase inhibitor, clade A (alpha-1 antiproteinase, antitrypsin), member 4 (SERPINA4), mRNA OS=Homo sapiens PE=2 SV=1
14	33.3	13	Q16270	IBP7_HUMAN	Insulin-like growth factor-binding protein 7 OS=Homo sapiens GN=IGFBP7 PE=1 SV=1
15.36	18.6	13	A8K3E4	A8K3E4_HUMAN	cDNA FLJ78367, highly similar to Homo sapiens fibrinogen, A alpha polypeptide (FGA), transcriptvariant alpha, mRNA OS=Homo sapiens PE=2 SV=1
2	14.8	13	Q65ZC8	Q65ZC8_HUMAN	Single-chain Fv (Fragment) OS=Homo sapiens GN=scFv PE=2 SV=1
15.06	36	13	P10451-5	OSTP_HUMAN	Isoform 5 of Osteopontin OS=Homo sapiens GN=SPP1
19.01	37.5	13	B4DEN5	B4DEN5_HUMAN	cDNA FLJ54344, highly similar to N-acetyllactosaminidebeta-1,3-N-acetylglucosaminyltransferase (EC 2.4.1.149) OS=Homo sapiens PE=2 SV=1
17.14	31	12	P02760	AMBP_HUMAN	Protein AMBP OS=Homo sapiens GN=AMBP PE=1 SV=1
18.32	24.1	12	D9ZGG2	D9ZGG2_HUMAN	Vitronectin OS=Homo sapiens GN=VTN PE=2 SV=1
0.08	25.8	12	A2N7P4	A2N7P4_HUMAN	Immunoglobulin mu-chain D-J4-region (Fragment) OS=Homo sapiens GN=IGHM PE=4 SV=1
8.34	56.7	12	Q0ZCJ4	Q0ZCJ4_HUMAN	Immunglobulin heavy chain variable region (Fragment) OS=Homo sapiens PE=4 SV=1
19.85	38.8	12	B3KQQ7	B3KQQ7_HUMAN	cDNA PSEC0037 fis, clone NT2RP1000800, highly similar to N-acetyllactosaminidebeta-1,3-N-acetylglucosaminyltransferase OS=Homo sapiens PE=2 SV=1
17.22	8.4	11	Q9Y4C0	NRX3A_HUMAN	Neurexin-3 OS=Homo sapiens GN=NRXN3 PE=1 SV=4
16.98	13.7	11	Q14118	DAG1_HUMAN	Dystroglycan OS=Homo sapiens GN=DAG1 PE=1 SV=2
13.54	20.6	11	Q16610	ECM1_HUMAN	Extracellular matrix protein 1 OS=Homo sapiens GN=ECM1 PE=1 SV=2
16.35	13.4	11	P12109	CO6A1_HUMAN	Collagen alpha-1(VI) chain OS=Homo sapiens GN=COL6A1 PE=1 SV=3
2.21	36.7	11	A2J1M2	A2J1M2_HUMAN	Rheumatoid factor RF-IP9 (Fragment) OS=Homo sapiens PE=2 SV=1
16.63	19.9	11	Q53HU9	Q53HU9_HUMAN	Complement component 1, r subcomponent variant (Fragment) OS=Homo sapiens PE=2 SV=1
16.94	38.3	11	P02750	A2GL_HUMAN	Leucine-rich alpha-2-glycoprotein OS=Homo sapiens GN=LRG1 PE=1 SV=2
17.4	34.9	11	P51884	LUM_HUMAN	Lumican OS=Homo sapiens GN=LUM PE=1 SV=2
0.17	36.2	11	P01779	HV318_HUMAN	Ig heavy chain V-III region TUR OS=Homo sapiens PE=1 SV=1
4.05	24.5	11	D9YZU8	D9YZU8_HUMAN	Hemoglobin, gamma A OS=Homo sapiens GN=HBG1 PE=2 SV=1
12	41.2	11	A2KBC6	A2KBC6_HUMAN	Anti-FactorVIII scFv (Fragment) OS=Homo sapiens PE=2 SV=1
16.82	19	10	P02748	CO9_HUMAN	Complement component C9 OS=Homo sapiens GN=C9 PE=1 SV=2
14.57	19.1	10	P13521	SCG2_HUMAN	Secretogranin-2 OS=Homo sapiens GN=SCG2 PE=1 SV=2
17.94	5.9	10	Q9Y6R7	FCGBP_HUMAN	IgGFc-binding protein OS=Homo sapiens GN=FCGBP PE=1 SV=3
18.06	20.7	10	G3XAM2	G3XAM2_HUMAN	Complement factor I light chain OS=Homo sapiens GN=CFI PE=2 SV=1
16.65	24	10	B3KUE5	B3KUE5_HUMAN	Phospholipid transfer protein OS=Homo sapiens GN=PLTP PE=2 SV=1
12.95	12.4	10	P13671	CO6_HUMAN	Complement component C6 OS=Homo sapiens GN=C6 PE=1 SV=3
13.83	47.5	10	B2R582	B2R582_HUMAN	cDNA, FLJ92374, highly similar to Homo sapiens C-type lectin domain family 3, member B (CLEC3B), mRNA OS=Homo sapiens PE=2 SV=1
16.56	3.1	10	P98160	PGBM_HUMAN	Basement membrane-specific heparan sulfate proteoglycan core protein OS=Homo sapiens GN=HSPG2 PE=1 SV=4
0.52	50.6	10	E9PHK0	E9PHK0_HUMAN	Tetranectin OS=Homo sapiens GN=CLEC3B PE=2 SV=1
2.01	33.3	10	P01766	HV305_HUMAN	Ig heavy chain V-III region BRO OS=Homo sapiens PE=1 SV=1
20.77	16.1	10	B2R7F8	B2R7F8_HUMAN	cDNA, FLJ93426, highly similar to Homo sapiens plasminogen (PLG), mRNA OS=Homo sapiens PE=2 SV=1
9.85	22.7	9	B2R9F2	B2R9F2_HUMAN	cDNA, FLJ94361, highly similar to Homo sapiens serine (or cysteine) proteinase inhibitor, clade A(alpha-1 antiproteinase, antitrypsin), member 6 (SERPINA6), mRNA OS=Homo sapiens PE=2 SV=1
4.04	53.1	9	Q9UL90	Q9UL90_HUMAN	Myosin-reactive immunoglobulin heavy chain variable region (Fragment) OS=Homo sapiens PE=2 SV=1
15.28	22	9	C9JEU5	C9JEU5_HUMAN	Fibrinogen gamma chain OS=Homo sapiens GN=FGG PE=2 SV=1
14.44	14.1	9	Q9NQ79	CRAC1_HUMAN	Cartilage acidic protein 1 OS=Homo sapiens GN=CRTAC1 PE=1 SV=2
15.58	15.5	9	F8VVB6	F8VVB6_HUMAN	Protein kinase C-binding protein NELL2 OS=Homo sapiens GN=NELL2 PE=2 SV=1
2	50.9	9	Q9UL77	Q9UL77_HUMAN	Myosin-reactive immunoglobulin light chain variable region (Fragment) OS=Homo sapiens PE=1 SV=1
2.01	48.6	9	A2JA19	A2JA19_HUMAN	Anti-mucin1 light chain variable region (Fragment) OS=Homo sapiens PE=2 SV=1
10.73	21.9	9	P05543	THBG_HUMAN	Thyroxine-binding globulin OS=Homo sapiens GN=SERPINA7 PE=1 SV=2
6.02	41.7	9	P04433	KV309_HUMAN	Ig kappa chain V-III region VG (Fragment) OS=Homo sapiens PE=1 SV=1
13.69	24.4	9	P16870	CBPE_HUMAN	Carboxypeptidase E OS=Homo sapiens GN=CPE PE=1 SV=1
2	19.8	9	H6VRG1	H6VRG1_HUMAN	Keratin 1 OS=Homo sapiens GN=KRT1 PE=2 SV=1
6	23.3	9	B4DQI1	B4DQI1_HUMAN	Complement C2b fragment OS=Homo sapiens GN=C2 PE=2 SV=1
8	21.3	9	O95973	O95973_HUMAN	VH4 heavy chain variable region (Fragment) OS=Homo sapiens GN=IGM PE=1 SV=1
2.06	15.7	9	D9YZU7	D9YZU7_HUMAN	Hemoglobin, epsilon 1 OS=Homo sapiens GN=HBE1 PE=2 SV=1
12.84	7	9	F5GYC7	F5GYC7_HUMAN	Neurexin-1-beta OS=Homo sapiens GN=NRXN1 PE=2 SV=1
14.07	33	8	D3DQH8	D3DQH8_HUMAN	Secreted protein, acidic, cysteine-rich (Osteonectin), isoform CRA_a OS=Homo sapiens GN=SPARC PE=2 SV=1
14.55	12.6	8	O75326	SEM7A_HUMAN	Semaphorin-7A OS=Homo sapiens GN=SEMA7A PE=1 SV=1
14.29	22.8	8	P07339	CATD_HUMAN	Cathepsin D OS=Homo sapiens GN=CTSD PE=1 SV=1
13.87	17.1	8	Q9NSD0	Q9NSD0_HUMAN	Protein S OS=Homo sapiens PE=2 SV=1
5.67	21	8	Q86XR1	Q86XR1_HUMAN	Major prion protein (Fragment) OS=Homo sapiens GN=PRNP PE=2 SV=1
8	41.2	8	Q5VY30	Q5VY30_HUMAN	Plasma retinol-binding protein(1-182) OS=Homo sapiens GN=RBP4 PE=2 SV=1
9.02	13.6	8	Q59EN5	Q59EN5_HUMAN	Prosaposin variant (Fragment) OS=Homo sapiens PE=2 SV=1
11.73	38.8	8	Q92520	FAM3C_HUMAN	Protein FAM3C OS=Homo sapiens GN=FAM3C PE=1 SV=1
6.05	31.3	8	P06314	KV404_HUMAN	Ig kappa chain V-IV region B17 OS=Homo sapiens PE=2 SV=1
11.64	16.6	8	P13645	K1C10_HUMAN	Keratin, type I cytoskeletal 10 OS=Homo sapiens GN=KRT10 PE=1 SV=6
0.75	33.6	8	P01596	KV104_HUMAN	Ig kappa chain V-I region CAR OS=Homo sapiens PE=1 SV=1
10	29.9	8	P00915	CAH1_HUMAN	Carbonic anhydrase 1 OS=Homo sapiens GN=CA1 PE=1 SV=2
11.4	12.6	8	Q53GU8	Q53GU8_HUMAN	Transforming growth factor, beta-induced, 68kDa variant (Fragment) OS=Homo sapiens PE=2 SV=1
1.82	4.7	8	Q59EG0	Q59EG0_HUMAN	Basement membrane-specific heparan sulfate proteoglycan core protein variant (Fragment) OS=Homo sapiens PE=2 SV=1
6	12.2	8	F8VYK9	F8VYK9_HUMAN	Insulin-like growth factor-binding protein 6 OS=Homo sapiens GN=IGFBP6 PE=2 SV=1
2	47.9	8	A2MYE2	A2MYE2_HUMAN	A30 protein (Fragment) OS=Homo sapiens GN=A30 PE=4 SV=1
2	33.3	8	Q9UL70	Q9UL70_HUMAN	Myosin-reactive immunoglobulin light chain variable region (Fragment) OS=Homo sapiens PE=1 SV=1
11.41	22.1	7	A4D2D2	A4D2D2_HUMAN	Procollagen C-endopeptidase enhancer OS=Homo sapiens GN=PCOLCE PE=4 SV=1
11.52	40.9	7	P17900	SAP3_HUMAN	Ganglioside GM2 activator OS=Homo sapiens GN=GM2A PE=1 SV=4
8.35	25.8	7	D6RA08	D6RA08_HUMAN	Complement C1q subcomponent subunit B (Fragment) OS=Homo sapiens GN=C1QB PE=2 SV=1
8.72	20.6	7	Q32Q65	Q32Q65_HUMAN	Fibrinogen beta chain OS=Homo sapiens GN=FGB PE=2 SV=1
9.77	4	7	Q7Z7M0	MEGF8_HUMAN	Multiple epidermal growth factor-like domains protein 8 OS=Homo sapiens GN=MEGF8 PE=1 SV=2
10.9	14.9	7	P07357	CO8A_HUMAN	Complement component C8 alpha chain OS=Homo sapiens GN=C8A PE=1 SV=2
7.9	5.7	7	A1L3A3	A1L3A3_HUMAN	Contactin 2 (Axonal) OS=Homo sapiens GN=CNTN2 PE=2 SV=1
12.07	27	7	P27169	PON1_HUMAN	Serum paraoxonase/arylesterase 1 OS=Homo sapiens GN=PON1 PE=1 SV=3
8.83	16.4	7	B3KXD3	B3KXD3_HUMAN	cDNA FLJ45230 fis, clone BRCAN2021325, highly similar to Carboxypeptidase E (EC 3.4.17.10) OS=Homo sapiens PE=2 SV=1
9.26	13.6	7	P05546	HEP2_HUMAN	Heparin cofactor 2 OS=Homo sapiens GN=SERPIND1 PE=1 SV=3
9.59	9.7	7	P02671	FIBA_HUMAN	Fibrinogen alpha chain OS=Homo sapiens GN=FGA PE=1 SV=2
6.02	5.7	6	B7Z9B1	B7Z9B1_HUMAN	cDNA FLJ52398, highly similar to Cadherin-13 OS=Homo sapiens PE=2 SV=1
4.36	3.6	6	G5E9G7	G5E9G7_HUMAN	Neurexin 2, isoform CRA_a OS=Homo sapiens GN=NRXN2 PE=2 SV=1
9.13	30.4	6	Q9UHG2	PCSK1_HUMAN	ProSAAS OS=Homo sapiens GN=PCSK1N PE=1 SV=1
9.87	13.9	6	P04180	LCAT_HUMAN	Phosphatidylcholine-sterol acyltransferase OS=Homo sapiens GN=LCAT PE=1 SV=1
4.38	16.4	6	Q7Z3B1	NEGR1_HUMAN	Neuronal growth regulator 1 OS=Homo sapiens GN=NEGR1 PE=1 SV=3
10.61	6.8	6	Q9UIU0	Q9UIU0_HUMAN	Dihydropyridine receptor alpha 2 subunit OS=Homo sapiens GN=CACNA2D1 PE=4 SV=1
10.13	22.5	6	P18065	IBP2_HUMAN	Insulin-like growth factor-binding protein 2 OS=Homo sapiens GN=IGFBP2 PE=1 SV=2
2	42.1	6	Q8TCZ8	Q8TCZ8_HUMAN	Apolipoprotein E (Fragment) OS=Homo sapiens GN=APOE PE=4 SV=1
6.5	25.6	6	P02743	SAMP_HUMAN	Serum amyloid P-component OS=Homo sapiens GN=APCS PE=1 SV=2
2	27.8	6	P01609	KV117_HUMAN	Ig kappa chain V-I region Scw OS=Homo sapiens PE=1 SV=1
2.08	28.2	6	P07998	RNAS1_HUMAN	Ribonuclease pancreatic OS=Homo sapiens GN=RNASE1 PE=1 SV=4
4.03	42.2	6	P01781	HV320_HUMAN	Ig heavy chain V-III region GAL OS=Homo sapiens PE=1 SV=1
10	14.3	6	F8W1Q3	F8W1Q3_HUMAN	Biotinidase OS=Homo sapiens GN=BTD PE=2 SV=1
10.01	11.6	6	Q5VVQ8	Q5VVQ8_HUMAN	Complement component 4 binding protein, alpha, isoform CRA_c OS=Homo sapiens GN=C4BPA PE=2 SV=1
10.24	36.2	6	K7ERG9	K7ERG9_HUMAN	Complement factor D OS=Homo sapiens GN=CFD PE=3 SV=1
2	36.6	6	Q9HCC1	Q9HCC1_HUMAN	Single chain Fv (Fragment) OS=Homo sapiens PE=1 SV=1
0.41	24.1	6	P01608	KV116_HUMAN	Ig kappa chain V-I region Roy OS=Homo sapiens PE=1 SV=1
2	31.5	6	P01594	KV102_HUMAN	Ig kappa chain V-I region AU OS=Homo sapiens PE=1 SV=1
9.16	26.2	6	O43866	CD5L_HUMAN	CD5 antigen-like OS=Homo sapiens GN=CD5L PE=1 SV=1
7.33	16.1	6	Q68CK4	Q68CK4_HUMAN	Leucine-rich alpha-2-glycoprotein OS=Homo sapiens GN=HMFT1766 PE=2 SV=1
7.1	67.7	6	L8B4J3	L8B4J3_HUMAN	Ubiquitin C OS=Homo sapiens GN=UbC PE=4 SV=1
10.02	17.2	5	P36222	CH3L1_HUMAN	Chitinase-3-like protein 1 OS=Homo sapiens GN=CHI3L1 PE=1 SV=2
3.35	28.1	5	Q6FHM9	Q6FHM9_HUMAN	CD59 antigen, complement regulatory protein, isoform CRA_b OS=Homo sapiens GN=CD59 PE=2 SV=1
6.7	5.3	5	P19022	CADH2_HUMAN	Cadherin-2 OS=Homo sapiens GN=CDH2 PE=1 SV=4
7.54	17.4	5	Q8WVW5	Q8WVW5_HUMAN	Putative uncharacterized protein (Fragment) OS=Homo sapiens PE=2 SV=1
8	16.1	5	D3DVW9	D3DVW9_HUMAN	Protein tyrosine phosphatase, non-receptor type substrate 1, isoform CRA_a OS=Homo sapiens GN=PTPNS1 PE=4 SV=1
8.51	5.1	5	Q92859	NEO1_HUMAN	Neogenin OS=Homo sapiens GN=NEO1 PE=1 SV=2
10.02	15	5	Q9H0C7	Q9H0C7_HUMAN	Putative uncharacterized protein DKFZp434B0535 OS=Homo sapiens GN=DKFZp434B0535 PE=2 SV=1
9.62	13.7	5	Q53GX6	Q53GX6_HUMAN	Nucleobindin 1 variant (Fragment) OS=Homo sapiens PE=2 SV=1
8.02	15.1	5	Q15818	NPTX1_HUMAN	Neuronal pentraxin-1 OS=Homo sapiens GN=NPTX1 PE=2 SV=2
0.27	4.2	5	P02452	CO1A1_HUMAN	Collagen alpha-1(I) chain OS=Homo sapiens GN=COL1A1 PE=1 SV=5
6.11	44.4	5	Q9UL83	Q9UL83_HUMAN	Myosin-reactive immunoglobulin light chain variable region (Fragment) OS=Homo sapiens PE=1 SV=1
6.56	28.6	5	Q3B7B1	Q3B7B1_HUMAN	PENK protein (Fragment) OS=Homo sapiens GN=PENK PE=2 SV=1
4.01	20	5	P35542	SAA4_HUMAN	Serum amyloid A-4 protein OS=Homo sapiens GN=SAA4 PE=1 SV=2
2	38.7	5	A2JA14	A2JA14_HUMAN	Anti-mucin1 heavy chain variable region (Fragment) OS=Homo sapiens PE=2 SV=1
2	17.1	5	P06331	HV209_HUMAN	Ig heavy chain V-II region ARH-77 OS=Homo sapiens PE=4 SV=1
4.03	36.8	5	A2MYD5	A2MYD5_HUMAN	V2-6 protein (Fragment) OS=Homo sapiens GN=V2-6 PE=4 SV=1
0.07	34	5	A2J1N5	A2J1N5_HUMAN	Rheumatoid factor RF-ET6 (Fragment) OS=Homo sapiens PE=2 SV=1
8.32	26.8	5	Q8NG19	Q8NG19_HUMAN	Multi-functional protein MFP OS=Homo sapiens PE=2 SV=1
8.05	7.1	5	D3DTX7	D3DTX7_HUMAN	Collagen, type I, alpha 1, isoform CRA_a OS=Homo sapiens GN=COL1A1 PE=4 SV=1
8.04	6.6	5	F8WE90	F8WE90_HUMAN	Probable E3 ubiquitin-protein ligase MYCBP2 OS=Homo sapiens GN=PAM PE=2 SV=1
2.34	29.3	5	A2MYD0	A2MYD0_HUMAN	V1-17 protein (Fragment) OS=Homo sapiens GN=V1-17 PE=4 SV=1
10.27	12	5	B2R6M6	B2R6M6_HUMAN	cDNA, FLJ93024, highly similar to Homo sapiens EGF-containing fibulin-like extracellular matrix protein 1 (EFEMP1), transcript variant 1, mRNA OS=Homo sapiens PE=2 SV=1
3.13	31.9	5	A0N5G1	A0N5G1_HUMAN	Rheumatoid factor C6 light chain (Fragment) OS=Homo sapiens GN=V<kappa>1 PE=2 SV=1
7.16	19.6	5	P24592	IBP6_HUMAN	Insulin-like growth factor-binding protein 6 OS=Homo sapiens GN=IGFBP6 PE=1 SV=1
8.88	43.9	5	J3KMY5	J3KMY5_HUMAN	Epididymal secretory protein E1 OS=Homo sapiens GN=NPC2 PE=4 SV=1
5.8	13.3	5	Q53FV4	Q53FV4_HUMAN	Lumican variant (Fragment) OS=Homo sapiens PE=2 SV=1
3.19	15.5	5	G3V357	G3V357_HUMAN	Ribonuclease pancreatic OS=Homo sapiens GN=RNASE1 PE=2 SV=1
6.52	11.4	5	B7ZM33	B7ZM33_HUMAN	Peptidoglycan recognition protein 2 OS=Homo sapiens GN=PGLYRP2 PE=2 SV=1
4.07	39	4	K7ERI9	K7ERI9_HUMAN	Truncated apolipoprotein C-I (Fragment) OS=Homo sapiens GN=APOC1 PE=4 SV=1
6	13.8	4	B7Z9J9	B7Z9J9_HUMAN	cDNA, FLJ78863, highly similar to Neurotrimin OS=Homo sapiens PE=2 SV=1
8.15	9.9	4	Q6UXB8	PI16_HUMAN	Peptidase inhibitor 16 OS=Homo sapiens GN=PI16 PE=1 SV=1
8.05	1.8	4	J3KQ66	J3KQ66_HUMAN	Reelin OS=Homo sapiens GN=RELN PE=4 SV=1
7.48	28.7	4	P07360	CO8G_HUMAN	Complement component C8 gamma chain OS=Homo sapiens GN=C8G PE=1 SV=3
4.2	38.5	4	B0YIW2	B0YIW2_HUMAN	Apolipoprotein C-III OS=Homo sapiens GN=APOC3 PE=2 SV=1
6.39	30	4	Q6FGX5	Q6FGX5_HUMAN	TIMP metallopeptidase inhibitor 1, isoform CRA_a OS=Homo sapiens GN=TIMP1 PE=2 SV=1
6.04	5.8	4	Q06481	APLP2_HUMAN	Amyloid-like protein 2 OS=Homo sapiens GN=APLP2 PE=1 SV=2
5.02	31.7	4	A8K6C9	A8K6C9_HUMAN	cDNA FLJ78037, highly similar to Homo sapiens insulin-like growth factor 2 (somatomedin A), mRNA OS=Homo sapiens PE=2 SV=1
5.74	18.1	4	P22352	GPX3_HUMAN	Glutathione peroxidase 3 OS=Homo sapiens GN=GPX3 PE=1 SV=2
4.71	16.5	4	H3BLU2	H3BLU2_HUMAN	Limbic system-associated membrane protein (Fragment) OS=Homo sapiens GN=LSAMP PE=2 SV=1
4.33	10.7	4	Q53HB8	Q53HB8_HUMAN	Oligodendrocyte myelin glycoprotein variant (Fragment) OS=Homo sapiens PE=2 SV=1
7.72	27.6	4	Q59GA0	Q59GA0_HUMAN	Thy-1 cell surface antigen variant (Fragment) OS=Homo sapiens PE=2 SV=1
8	9.9	4	B3KNN9	B3KNN9_HUMAN	cDNA FLJ30070 fis, clone ASTRO2000046, highly similar to CD166 ANTIGEN OS=Homo sapiens PE=2 SV=1
2.01	32.8	4	P01762	HV301_HUMAN	Ig heavy chain V-III region TRO OS=Homo sapiens PE=1 SV=1
6.2	2.9	4	P12259	FA5_HUMAN	Coagulation factor V OS=Homo sapiens GN=F5 PE=1 SV=4
5.84	6.4	4	P22792	CPN2_HUMAN	Carboxypeptidase N subunit 2 OS=Homo sapiens GN=CPN2 PE=1 SV=3
2.69	16.7	4	P04430	KV122_HUMAN	Ig kappa chain V-I region BAN OS=Homo sapiens PE=1 SV=1
6	32.5	4	Q53HV6	Q53HV6_HUMAN	Niemann-Pick disease, type C2 variant (Fragment) OS=Homo sapiens PE=2 SV=1
4.17	7.8	4	P09603	CSF1_HUMAN	Macrophage colony-stimulating factor 1 OS=Homo sapiens GN=CSF1 PE=1 SV=2
2.09	35.7	4	P01767	HV306_HUMAN	Ig heavy chain V-III region BUT OS=Homo sapiens PE=1 SV=1
8	16.2	4	Q8NFZ8	CADM4_HUMAN	Cell adhesion molecule 4 OS=Homo sapiens GN=CADM4 PE=1 SV=1
8.05	14.1	4	P35527	K1C9_HUMAN	Keratin, type I cytoskeletal 9 OS=Homo sapiens GN=KRT9 PE=1 SV=3
4.87	14.4	4	Q5U077	Q5U077_HUMAN	L-lactate dehydrogenase OS=Homo sapiens GN=LDHB PE=2 SV=1
7.22	4.2	4	J3QSX2	J3QSX2_HUMAN	Neurofascin OS=Homo sapiens GN=NFASC PE=4 SV=1
6.29	41	4	G4XXL9	G4XXL9_HUMAN	Cytochrome c OS=Homo sapiens GN=CYCS PE=2 SV=1
2	6.4	4	P35908	K22E_HUMAN	Keratin, type II cytoskeletal 2 epidermal OS=Homo sapiens GN=KRT2 PE=1 SV=2
6.76	3.7	4	C9JFM0	C9JFM0_HUMAN	Receptor-type tyrosine-protein phosphatase zeta OS=Homo sapiens GN=PTPRZ1 PE=2 SV=1
6.93	24.8	4	P60174	TPIS_HUMAN	Triosephosphate isomerase OS=Homo sapiens GN=TPI1 PE=1 SV=3
5.6	28.5	4	D6RD17	D6RD17_HUMAN	Immunoglobulin J chain (Fragment) OS=Homo sapiens GN=IGJ PE=2 SV=1
3.38	17.7	4	D3DQB3	D3DQB3_HUMAN	Sparc/osteonectin, cwcv and kazal-like domains proteoglycan (Testican) 1, isoform CRA_a OS=Homo sapiens GN=SPOCK1 PE=2 SV=1
6.52	38.1	4	D3JV41	D3JV41_HUMAN	Thrombocidin-2 antimicrobial variant (Fragment) OS=Homo sapiens PE=2 SV=1
2	25.2	4	P01780	HV319_HUMAN	Ig heavy chain V-III region JON OS=Homo sapiens PE=1 SV=1
6	3.9	4	Q92954	PRG4_HUMAN	Proteoglycan 4 OS=Homo sapiens GN=PRG4 PE=1 SV=2
2	11.7	4	B2R701	B2R701_HUMAN	cDNA, FLJ93202, Homo sapiens protease inhibitor 16 (PI16), mRNA OS=Homo sapiens PE=2 SV=1
6.58	57.5	4	Q96MH4	Q96MH4_HUMAN	cDNA FLJ32377 fis, clone SKMUS1000014, highly similar to Polyubiquitin 9 OS=Homo sapiens PE=2 SV=1
4.41	32.7	4	A2NB45	A2NB45_HUMAN	Cold agglutinin FS-1 L-chain (Fragment) OS=Homo sapiens PE=2 SV=1
2	7.8	4	H6VRG2	H6VRG2_HUMAN	Keratin 1 OS=Homo sapiens GN=KRT1 PE=3 SV=1
6	32.2	4	Q0ZCH9	Q0ZCH9_HUMAN	Immunglobulin heavy chain variable region (Fragment) OS=Homo sapiens PE=4 SV=1
2.33	35.6	4	A0N5G5	A0N5G5_HUMAN	Rheumatoid factor D5 light chain (Fragment) OS=Homo sapiens GN=V<kappa>3 PE=2 SV=1
7.44	7.8	4	H6VRG3	H6VRG3_HUMAN	Keratin 1 OS=Homo sapiens GN=KRT1 PE=3 SV=1
8.1	21.8	4	P05452	TETN_HUMAN	Tetranectin OS=Homo sapiens GN=CLEC3B PE=1 SV=3
0.51	46.9	4	A2J1N0	A2J1N0_HUMAN	Rheumatoid factor RF-IP14 (Fragment) OS=Homo sapiens PE=2 SV=1
4.56	9.1	4	Q59G97	Q59G97_HUMAN	EGF-containing fibulin-like extracellular matrix protein 1 isoform b variant (Fragment) OS=Homo sapiens PE=4 SV=1
5.28	11.8	3	Q8N126	CADM3_HUMAN	Cell adhesion molecule 3 OS=Homo sapiens GN=CADM3 PE=1 SV=1
6.16	25.1	3	D9IAI1	D9IAI1_HUMAN	Phosphatidylethanolamine-binding protein 1 OS=Homo sapiens PE=2 SV=1
5.52	12.9	3	H0YDW7	H0YDW7_HUMAN	CD44 antigen (Fragment) OS=Homo sapiens GN=CD44 PE=2 SV=1
4.63	17.6	3	Q96S96	PEBP4_HUMAN	Phosphatidylethanolamine-binding protein 4 OS=Homo sapiens GN=PEBP4 PE=1 SV=3
3.06	15.6	3	Q6FHD0	Q6FHD0_HUMAN	SGNE1 protein (Fragment) OS=Homo sapiens GN=SGNE1 PE=2 SV=1
5.09	5.9	3	A8K144	A8K144_HUMAN	cDNA FLJ76746, highly similar to Homo sapiens brevican (BCAN), transcript variant 1, mRNA OS=Homo sapiens PE=2 SV=1
3.68	5.6	3	B2R642	B2R642_HUMAN	cDNA, FLJ92775, highly similar to Homo sapiens melanoma cell adhesion molecule (MCAM), mRNA OS=Homo sapiens PE=2 SV=1
5.37	10.5	3	H3BTN5	H3BTN5_HUMAN	Pyruvate kinase (Fragment) OS=Homo sapiens GN=PKM PE=2 SV=1
6	4.5	3	H0YNG5	H0YNG5_HUMAN	Alpha-mannosidase 2x OS=Homo sapiens GN=MAN2A2 PE=2 SV=1
5.55	6.4	3	P33908	MA1A1_HUMAN	Mannosyl-oligosaccharide 1,2-alpha-mannosidase IA OS=Homo sapiens GN=MAN1A1 PE=1 SV=3
2.47	38.9	3	P01611	KV119_HUMAN	Ig kappa chain V-I region Wes OS=Homo sapiens PE=1 SV=1
5.16	33	3	O60888	CUTA_HUMAN	Protein CutA OS=Homo sapiens GN=CUTA PE=1 SV=2
2	16.5	3	P01612	KV120_HUMAN	Ig kappa chain V-I region Mev OS=Homo sapiens PE=1 SV=1
0.68	31.8	3	A2JA16	A2JA16_HUMAN	Anti-mucin1 light chain variable region (Fragment) OS=Homo sapiens PE=2 SV=1
4.44	4.8	3	Q6MZW2	FSTL4_HUMAN	Follistatin-related protein 4 OS=Homo sapiens GN=FSTL4 PE=2 SV=3
4	30.4	3	P01613	KV121_HUMAN	Ig kappa chain V-I region Ni OS=Homo sapiens PE=1 SV=1
4	4.2	3	Q6EMK4	VASN_HUMAN	Vasorin OS=Homo sapiens GN=VASN PE=1 SV=1
4.07	3.7	3	Q53EL9	SEZ6_HUMAN	Seizure protein 6 homolog OS=Homo sapiens GN=SEZ6 PE=1 SV=2
5.47	5	3	H0YAC1	H0YAC1_HUMAN	Plasma kallikrein heavy chain (Fragment) OS=Homo sapiens GN=KLKB1 PE=3 SV=1
4.14	10	3	D6REX5	D6REX5_HUMAN	Selenoprotein P (Fragment) OS=Homo sapiens GN=SEPP1 PE=4 SV=1
6	14.2	3	B4DF70	B4DF70_HUMAN	cDNA FLJ60461, highly similar to Peroxiredoxin-2 (EC 1.11.1.15) OS=Homo sapiens PE=2 SV=1
6	6.2	3	O00391	QSOX1_HUMAN	Sulfhydryl oxidase 1 OS=Homo sapiens GN=QSOX1 PE=1 SV=3
6.04	7.6	3	Q8TAY0	Q8TAY0_HUMAN	Insulin-like growth factor binding protein, acid labile subunit OS=Homo sapiens GN=IGFALS PE=2 SV=1
4.98	11.8	3	D6RDX1	D6RDX1_HUMAN	Vesicular integral-membrane protein VIP36 (Fragment) OS=Homo sapiens GN=LMAN2 PE=2 SV=1
5.93	16.3	3	P02747	C1QC_HUMAN	Complement C1q subcomponent subunit C OS=Homo sapiens GN=C1QC PE=1 SV=3
4.69	9.7	3	B7Z2R9	B7Z2R9_HUMAN	Lysosome-associated membrane glycoprotein 2 OS=Homo sapiens GN=LAMP2 PE=2 SV=1
5.92	7.6	3	Q8IZZ5	Q8IZZ5_HUMAN	Coagulation factor XII-Mie OS=Homo sapiens PE=2 SV=1
5.7	9.7	3	Q6FHG6	Q6FHG6_HUMAN	PRELP protein (Fragment) OS=Homo sapiens GN=PRELP PE=2 SV=1
4.7	10	3	B7Z3K9	B7Z3K9_HUMAN	Fructose-bisphosphate aldolase OS=Homo sapiens PE=2 SV=1
5.89	16.4	3	Q96FE7	P3IP1_HUMAN	Phosphoinositide-3-kinase-interacting protein 1 OS=Homo sapiens GN=PIK3IP1 PE=1 SV=2
2.03	7	3	Q2TU84	Q2TU84_HUMAN	Aspartate aminotransferase OS=Homo sapiens GN=GIG18 PE=2 SV=1
4.57	9	3	G3V0F0	G3V0F0_HUMAN	Putative uncharacterized protein MGC45438 OS=Homo sapiens GN=C16orf89 PE=2 SV=1
2.13	32.2	3	A0N5G3	A0N5G3_HUMAN	Rheumatoid factor G9 light chain (Fragment) OS=Homo sapiens GN=V<lambda>3 PE=2 SV=1
2.34	30.9	3	A2NXP8	A2NXP8_HUMAN	Heavy chain variable region (Fragment) OS=Homo sapiens PE=2 SV=1
5.66	13.6	3	A2VDK1	A2VDK1_HUMAN	LRRC4B protein (Fragment) OS=Homo sapiens GN=LRRC4B PE=2 SV=1
2	17	3	A2NYV4	A2NYV4_HUMAN	Light chain Fab (Fragment) OS=Homo sapiens PE=2 SV=1
4	5	3	A8K6K8	A8K6K8_HUMAN	cDNA FLJ77325 OS=Homo sapiens PE=2 SV=1
1.3	4.4	3	B1AP59	B1AP59_HUMAN	Carboxypeptidase N, polypeptide 1, 50kD OS=Homo sapiens GN=CPN1 PE=2 SV=1
5.89	3.2	3	Q59H90	Q59H90_HUMAN	Protein tyrosine phosphatase, receptor type, D isoform 4 variant (Fragment) OS=Homo sapiens PE=2 SV=1
1.78	6.6	3	G3V5Q9	G3V5Q9_HUMAN	Plasma serine protease inhibitor (Fragment) OS=Homo sapiens GN=SERPINA5 PE=2 SV=1
4.66	6.5	3	F5H7G1	F5H7G1_HUMAN	Complement component C8 beta chain OS=Homo sapiens GN=C8B PE=2 SV=1
0.8	18	3	Q0ZCI2	Q0ZCI2_HUMAN	Immunglobulin heavy chain variable region (Fragment) OS=Homo sapiens PE=4 SV=1
0.94	19.2	3	Q5NV84	Q5NV84_HUMAN	V1-3 protein (Fragment) OS=Homo sapiens GN=IGLV2-11 PE=4 SV=1
4.79	14.8	3	C9JRR0	C9JRR0_HUMAN	Augurin (Fragment) OS=Homo sapiens GN=C2orf40 PE=2 SV=1
2.03	2.1	3	Q9ULB1-3	NRX1A_HUMAN	Isoform 3a of Neurexin-1 OS=Homo sapiens GN=NRXN1
2.46	2.9	3	P48058	GRIA4_HUMAN	Glutamate receptor 4 OS=Homo sapiens GN=GRIA4 PE=2 SV=2
3.54	22.5	3	Q96FE7-4	P3IP1_HUMAN	Isoform 4 of Phosphoinositide-3-kinase-interacting protein 1 OS=Homo sapiens GN=PIK3IP1
2.6	0.3	3	Q14204	DYHC1_HUMAN	REVERSED Cytoplasmic dynein 1 heavy chain 1 OS=Homo sapiens GN=DYNC1H1 PE=1 SV=5
2.95	9.7	3	P41271-2	NBL1_HUMAN	Isoform 2 of Neuroblastoma suppressor of tumorigenicity 1 OS=Homo sapiens GN=NBL1
3.01	9.9	3	D3DP13	D3DP13_HUMAN	Fibrinogen beta chain, isoform CRA_e OS=Homo sapiens GN=FGB PE=2 SV=1
3.74	2.6	2	B7Z5L4	B7Z5L4_HUMAN	cDNA FLJ61340, highly similar to Homo sapiens seizure related 6 homolog-like 2 (SEZ6L2), transcript variant 2, mRNA OS=Homo sapiens PE=2 SV=1
3.37	5.2	2	B4E367	B4E367_HUMAN	cDNA FLJ61564, highly similar to Plexin domain-containing protein 2 OS=Homo sapiens PE=2 SV=1
4.05	0.7	2	E9PCV6	E9PCV6_HUMAN	Collagen alpha-3(VI) chain OS=Homo sapiens GN=COL6A3 PE=2 SV=1
2	1.7	2	Q9BTE3	MCMBP_HUMAN	Mini-chromosome maintenance complex-binding protein OS=Homo sapiens GN=MCMBP PE=1 SV=2
2.81	18	2	K7ER74	K7ER74_HUMAN	Apolipoprotein C-II OS=Homo sapiens GN=APOC2 PE=4 SV=1
4.03	15.5	2	P16035	TIMP2_HUMAN	Metalloproteinase inhibitor 2 OS=Homo sapiens GN=TIMP2 PE=1 SV=2
4.01	7.2	2	B4DTZ8	B4DTZ8_HUMAN	cDNA FLJ52277, highly similar to Follistatin-related protein 1 OS=Homo sapiens PE=2 SV=1
2.87	2.6	2	G3XAE6	G3XAE6_HUMAN	Extracellular sulfatase Sulf-2 OS=Homo sapiens GN=SULF2 PE=2 SV=1
2	16.8	2	Q0ZCH6	Q0ZCH6_HUMAN	Immunglobulin heavy chain variable region (Fragment) OS=Homo sapiens PE=4 SV=1
2.46	9.4	2	P02745	C1QA_HUMAN	Complement C1q subcomponent subunit A OS=Homo sapiens GN=C1QA PE=1 SV=2
2.18	2.7	2	D3DSC5	D3DSC5_HUMAN	Neural cell adhesion molecule 2, isoform CRA_a (Fragment) OS=Homo sapiens GN=NCAM2 PE=2 SV=1
0.42	2.3	2	Q9NWK9	BCD1_HUMAN	Box C/D snoRNA protein 1 OS=Homo sapiens GN=ZNHIT6 PE=1 SV=1
2	1.4	2	B4DYV8	B4DYV8_HUMAN	Roundabout homolog 4 OS=Homo sapiens GN=ROBO4 PE=2 SV=1
2.54	23.3	2	P04434	KV310_HUMAN	Ig kappa chain V-III region VH (Fragment) OS=Homo sapiens PE=4 SV=1
4	8.3	2	B4E1J3	B4E1J3_HUMAN	cDNA FLJ53615, highly similar to Fibromodulin OS=Homo sapiens PE=2 SV=1
2.02	0.1	2	D3DPG0	D3DPG0_HUMAN	Titin, isoform CRA_a OS=Homo sapiens GN=TTN PE=4 SV=1
2.03	5.2	2	B4DWF9	B4DWF9_HUMAN	cDNA FLJ60358, highly similar to Regulator of G-protein signaling 3 OS=Homo sapiens PE=2 SV=1
3.49	9.6	2	A0A4Z1	A0A4Z1_HUMAN	CADM1 protein OS=Homo sapiens GN=CADM1 PE=2 SV=1
2	10.8	2	C9J0J0	C9J0J0_HUMAN	Coiled-coil domain-containing protein 126 (Fragment) OS=Homo sapiens GN=CCDC126 PE=2 SV=1
3.01	0.5	2	Q9NYQ8	FAT2_HUMAN	Protocadherin Fat 2 OS=Homo sapiens GN=FAT2 PE=1 SV=2
2	0.8	2	G3XAI2	G3XAI2_HUMAN	Laminin subunit beta-1 OS=Homo sapiens GN=LAMB1 PE=2 SV=1
0.07	10.7	2	Q562M3	Q562M3_HUMAN	Actin-like protein (Fragment) OS=Homo sapiens GN=ACT PE=3 SV=1
0.65	4.7	2	Q13228	SBP1_HUMAN	Selenium-binding protein 1 OS=Homo sapiens GN=SELENBP1 PE=1 SV=2
4.09	5.9	2	B5MBX2	B5MBX2_HUMAN	Transcobalamin-2 OS=Homo sapiens GN=TCN2 PE=2 SV=1
2.89	7.7	2	J3KNF6	J3KNF6_HUMAN	RGM domain family member B OS=Homo sapiens GN=RGMB PE=4 SV=1
4	8.5	2	Q53HP2	Q53HP2_HUMAN	Tripeptidyl-peptidase I variant (Fragment) OS=Homo sapiens PE=2 SV=1
0.61	20.7	2	Q96JD0	Q96JD0_HUMAN	Amyloid lambda 6 light chain variable region SAR (Fragment) OS=Homo sapiens PE=1 SV=1
1.21	3.7	2	Q6FHV6	Q6FHV6_HUMAN	ENO2 protein OS=Homo sapiens GN=ENO2 PE=2 SV=1
3.07	7.4	2	B2R7N9	B2R7N9_HUMAN	cDNA, FLJ93532, highly similar to Homo sapiens osteomodulin (OMD), mRNA OS=Homo sapiens PE=2 SV=1
4	4.1	2	Q59HE0	Q59HE0_HUMAN	Colony stimulating factor 1 receptor variant (Fragment) OS=Homo sapiens PE=2 SV=1
2.01	9.5	2	Q8NCE1	Q8NCE1_HUMAN	cDNA FLJ90312 fis, clone NT2RP2001276, moderately similar to NPDC-1 PROTEIN OS=Homo sapiens PE=2 SV=1
2	12.4	2	P01824	HV206_HUMAN	Ig heavy chain V-II region WAH OS=Homo sapiens PE=1 SV=1
2	2.4	2	Q86Y38	XYLT1_HUMAN	Xylosyltransferase 1 OS=Homo sapiens GN=XYLT1 PE=1 SV=1
2.54	3.5	2	Q03167	TGBR3_HUMAN	Transforming growth factor beta receptor type 3 OS=Homo sapiens GN=TGFBR3 PE=1 SV=3
3.27	5.6	2	B2R672	B2R672_HUMAN	Extracellular link domain containing 1 OS=Homo sapiens GN=XLKD1 PE=2 SV=1
1.02	10.4	2	P23435	CBLN1_HUMAN	Cerebellin-1 OS=Homo sapiens GN=CBLN1 PE=1 SV=1
0.05	0.4	2	Q6IE36	OVOS2_HUMAN	REVERSED Ovostatin homolog 2 OS=Homo sapiens GN=OVOS2 PE=2 SV=2
4	20.4	2	H0YN67	H0YN67_HUMAN	Immunoglobulin superfamily-containing leucine-rich repeat protein (Fragment) OS=Homo sapiens GN=ISLR PE=2 SV=1
0.35	7.9	2	Q5J875	Q5J875_HUMAN	GUGU gamma form OS=Homo sapiens GN=GUGU PE=2 SV=1
3.02	5.8	2	P08253	MMP2_HUMAN	72 kDa type IV collagenase OS=Homo sapiens GN=MMP2 PE=1 SV=2
2.24	2	2	P08123	CO1A2_HUMAN	Collagen alpha-2(I) chain OS=Homo sapiens GN=COL1A2 PE=1 SV=7
2.01	10.5	2	P22692	IBP4_HUMAN	Insulin-like growth factor-binding protein 4 OS=Homo sapiens GN=IGFBP4 PE=1 SV=2
2.64	7.7	2	B1AKG0	B1AKG0_HUMAN	Complement factor H-related protein 1 OS=Homo sapiens GN=CFHR1 PE=2 SV=1
2	16.4	2	A0N7J6	A0N7J6_HUMAN	REV25-2 (Fragment) OS=Homo sapiens PE=2 SV=1
2.2	9.6	2	P00918	CAH2_HUMAN	Carbonic anhydrase 2 OS=Homo sapiens GN=CA2 PE=1 SV=2
4.09	6.5	2	Q2KHQ6	Q2KHQ6_HUMAN	APOL1 protein OS=Homo sapiens GN=APOL1 PE=2 SV=2
2	19.5	2	F2Z337	F2Z337_HUMAN	Myoglobin (Fragment) OS=Homo sapiens GN=MB PE=2 SV=1
0.1	2.9	2	B4E240	B4E240_HUMAN	REVERSED cDNA FLJ58827, highly similar to UBX domain-containing protein 2 OS=Homo sapiens PE=2 SV=1
4.02	4.6	2	E7END6	E7END6_HUMAN	Vitamin K-dependent protein C heavy chain OS=Homo sapiens GN=PROC PE=2 SV=1
1.74	4.7	2	B3KNK9	B3KNK9_HUMAN	Golgi phosphoprotein 2, isoform CRA_a OS=Homo sapiens GN=GOLPH2 PE=2 SV=1
2	13.4	2	A2NW97	A2NW97_HUMAN	Rheumatoid factor Vh I region (Fragment) OS=Homo sapiens PE=2 SV=1
3	2.7	2	B4DZ36	B4DZ36_HUMAN	cDNA FLJ58441, highly similar to Attractin OS=Homo sapiens PE=2 SV=1
1.39	1.1	2	Q5SYB0	FRPD1_HUMAN	FERM and PDZ domain-containing protein 1 OS=Homo sapiens GN=FRMPD1 PE=1 SV=1
3.59	10.9	2	Q5SRP5	Q5SRP5_HUMAN	Apolipoprotein M OS=Homo sapiens GN=APOM PE=2 SV=1
2.22	3.4	2	Q59GL7	Q59GL7_HUMAN	Glutamate receptor, ionotrophic variant (Fragment) OS=Homo sapiens PE=4 SV=1
0.96	24.5	2	F5H6W8	F5H6W8_HUMAN	L-lactate dehydrogenase A chain OS=Homo sapiens GN=LDHA PE=2 SV=1
2	0.5	2	Q9C0G6	DYH6_HUMAN	Dynein heavy chain 6, axonemal OS=Homo sapiens GN=DNAH6 PE=1 SV=3
1.46	5.2	2	Q1HP67	Q1HP67_HUMAN	Lipoprotein, Lp(A) OS=Homo sapiens GN=LPA PE=3 SV=1
2.45	4.7	2	Q86SE4	Q86SE4_HUMAN	L1 cell adhesion molecule (Fragment) OS=Homo sapiens GN=L1CAM PE=2 SV=1
0.1	6.2	2	A2NV54	A2NV54_HUMAN	Precursor (AA -19 to 108) (Fragment) OS=Homo sapiens PE=2 SV=1
2	0.1	2	B5ME49	B5ME49_HUMAN	Mucin-16 OS=Homo sapiens GN=MUC16 PE=2 SV=2
2	27.3	2	Q5NV63	Q5NV63_HUMAN	V1-4 protein (Fragment) OS=Homo sapiens GN=V1-4 PE=4 SV=1
1.82	9.2	2	P01773	HV312_HUMAN	Ig heavy chain V-III region BUR OS=Homo sapiens PE=1 SV=1
4	4.2	2	Q96N46	TTC14_HUMAN	Tetratricopeptide repeat protein 14 OS=Homo sapiens GN=TTC14 PE=1 SV=1
4	4.1	2	P05160	F13B_HUMAN	Coagulation factor XIII B chain OS=Homo sapiens GN=F13B PE=1 SV=3
4	3.2	2	Q9ULB4	CADH9_HUMAN	Cadherin-9 OS=Homo sapiens GN=CDH9 PE=2 SV=2
4	10	2	Q5T0Y8	Q5T0Y8_HUMAN	Acid sphingomyelinase-like phosphodiesterase 3b (Fragment) OS=Homo sapiens GN=SMPDL3B PE=2 SV=1
0.56	25	2	P01778	HV317_HUMAN	Ig heavy chain V-III region ZAP OS=Homo sapiens PE=1 SV=1
4	11.9	2	C9JLV0	C9JLV0_HUMAN	Probable serine carboxypeptidase CPVL (Fragment) OS=Homo sapiens GN=CPVL PE=2 SV=1
2.14	1.8	2	B7ZLX5	B7ZLX5_HUMAN	PTPRG protein OS=Homo sapiens GN=PTPRG PE=2 SV=1
0.09	4.4	2	B3KY43	B3KY43_HUMAN	cDNA FLJ46798 fis, clone TRACH3031660, highly similar to cAMP-dependent protein kinase type II-beta regulatory subunit OS=Homo sapiens PE=2 SV=1
4	3.2	2	A8K604	A8K604_HUMAN	cDNA FLJ77469, highly similar to Homo sapiens protein tyrosine phosphatase, receptor type, N, mRNA OS=Homo sapiens PE=2 SV=1
2.91	1.1	2	O00468	AGRIN_HUMAN	Agrin OS=Homo sapiens GN=AGRN PE=1 SV=5
2.01	5.3	2	Q56UX9	Q56UX9_HUMAN	MOG beta-3 (Fragment) OS=Homo sapiens PE=2 SV=1
3.44	13.8	2	Q6UY50	Q6UY50_HUMAN	NL3 OS=Homo sapiens GN=UNQ172 PE=2 SV=1
2.85	14.6	2	B2R5G8	B2R5G8_HUMAN	Serum amyloid A protein OS=Homo sapiens PE=2 SV=1
0.17	6.5	2	Q59GC4	Q59GC4_HUMAN	Transcription factor E2F5 variant (Fragment) OS=Homo sapiens PE=2 SV=1
0.14	3	2	P08174-5	DAF_HUMAN	Isoform 5 of Complement decay-accelerating factor OS=Homo sapiens GN=CD55
1.64	9.4	2	A2N011	A2N011_HUMAN	Vh1-D-J3-region (Fragment) OS=Homo sapiens PE=2 SV=1
1.74	2.9	2	Q5JP69	Q5JP69_HUMAN	Complement component 2, isoform CRA_b OS=Homo sapiens GN=C2 PE=2 SV=1
2.75	0.9	2	P23471	PTPRZ_HUMAN	Receptor-type tyrosine-protein phosphatase zeta OS=Homo sapiens GN=PTPRZ1 PE=1 SV=4
0.83	1.7	2	B4DRY1	B4DRY1_HUMAN	cDNA FLJ54428, highly similar to SLIT and NTRK-like protein 1 OS=Homo sapiens PE=2 SV=1
0.29	2.3	2	B1AMR4	B1AMR4_HUMAN	Rho guanine nucleotide exchange factor 9 OS=Homo sapiens GN=ARHGEF9 PE=2 SV=1
2.01	1	2	Q59GJ0	Q59GJ0_HUMAN	Eukaryotic translation initiation factor 4 gamma, 3 variant (Fragment) OS=Homo sapiens PE=2 SV=1
1.19	2.3	2	P19021-5	AMD_HUMAN	Isoform 5 of Peptidyl-glycine alpha-amidating monooxygenase OS=Homo sapiens GN=PAM
3.68	6.8	2	O14498	ISLR_HUMAN	Immunoglobulin superfamily containing leucine-rich repeat protein OS=Homo sapiens GN=ISLR PE=1 SV=1
1.1	29.6	2	Q5T4B6	Q5T4B6_HUMAN	HCG1780554 OS=Homo sapiens GN=TMSB4XP4 PE=4 SV=1
2.16	0	2	Q8WZ42-12	TITIN_HUMAN	REVERSED Isoform 12 of Titin OS=Homo sapiens GN=TTN
0.37	19.5	2	A2NWW1	A2NWW1_HUMAN	VH-3 family (VH26)D/J protein (Fragment) OS=Homo sapiens GN=VH-3 family (VH26)D/J PE=4 SV=1
4	18.4	2	Q9UL95	Q9UL95_HUMAN	Myosin-reactive immunoglobulin heavy chain variable region (Fragment) OS=Homo sapiens PE=2 SV=1
4.09	2.3	2	A8K1S0	A8K1S0_HUMAN	cDNA FLJ75250, highly similar to Homo sapiens contactin 2 (axonal) (CNTN2), mRNA OS=Homo sapiens PE=2 SV=1
0.79	0.7	2	F8W6L6	F8W6L6_HUMAN	Myosin-10 OS=Homo sapiens GN=MYH10 PE=2 SV=1
4	14.2	2	P01210	PENK_HUMAN	Proenkephalin-A OS=Homo sapiens GN=PENK PE=1 SV=1
2	21.3	2	P01593	KV101_HUMAN	Ig kappa chain V-I region AG OS=Homo sapiens PE=1 SV=1
1.14	4.8	2	F5H7E1	F5H7E1_HUMAN	Inter-alpha-trypsin inhibitor heavy chain H1 OS=Homo sapiens GN=ITIH1 PE=2 SV=1
0.21	5.5	1	Q6B0I4	Q6B0I4_HUMAN	Opioid binding protein/cell adhesion molecule-like OS=Homo sapiens GN=OPCML PE=2 SV=1
1.77	6.2	1	J3KQI0	J3KQI0_HUMAN	Lymphocyte antigen 6H OS=Homo sapiens GN=LY6H PE=4 SV=1
0.11	1.6	1	B3KS46	B3KS46_HUMAN	REVERSED cDNA FLJ35454 fis, clone SMINT2004473, highly similar to Homo sapiens aarF domain containing kinase 5 (ADCK5), mRNA OS=Homo sapiens PE=2 SV=1
2.07	6.4	1	K7ES70	K7ES70_HUMAN	Microfibril-associated glycoprotein 4 OS=Homo sapiens GN=MFAP4 PE=4 SV=1
2	5.4	1	F8W8J5	F8W8J5_HUMAN	V-set and transmembrane domain-containing protein 2A OS=Homo sapiens GN=VSTM2A PE=2 SV=1
2.02	2.4	1	Q99574	NEUS_HUMAN	Neuroserpin OS=Homo sapiens GN=SERPINI1 PE=1 SV=1
0.3	4.3	1	B7ZLI0	B7ZLI0_HUMAN	Reticulon 4 receptor-like 2 OS=Homo sapiens GN=RTN4RL2 PE=2 SV=1
0.18	5.3	1	Q9NSI1	Q9NSI1_HUMAN	REVERSED HCG401283 OS=Homo sapiens GN=PRED57 PE=4 SV=1
2	1.4	1	E9PG71	E9PG71_HUMAN	Ephrin type-A receptor 4 OS=Homo sapiens GN=EPHA4 PE=2 SV=1
2	12.9	1	Q8N9F6	Q8N9F6_HUMAN	cDNA FLJ37453 fis, clone BRAWH2010754 OS=Homo sapiens PE=2 SV=1
2.02	2.1	1	J3KQ60	J3KQ60_HUMAN	Inter-alpha-trypsin inhibitor heavy chain H5 OS=Homo sapiens GN=ITIH5 PE=4 SV=1
0.9	9.5	1	Q16568	CART_HUMAN	Cocaine- and amphetamine-regulated transcript protein OS=Homo sapiens GN=CARTPT PE=1 SV=1
2.03	5.8	1	Q8N8F1	Q8N8F1_HUMAN	Exostoses (Multiple)-like 2, isoform CRA_b OS=Homo sapiens GN=EXTL2 PE=2 SV=1
1.92	3	1	Q6FHC9	Q6FHC9_HUMAN	STC2 protein (Fragment) OS=Homo sapiens GN=STC2 PE=2 SV=1
2	2.3	1	Q14520	HABP2_HUMAN	Hyaluronan-binding protein 2 OS=Homo sapiens GN=HABP2 PE=1 SV=1
2	3.8	1	J3KPS3	J3KPS3_HUMAN	Fructose-bisphosphate aldolase OS=Homo sapiens GN=ALDOA PE=3 SV=1
1.01	4	1	Q8TCF0	Q8TCF0_HUMAN	LBP protein OS=Homo sapiens GN=LBP PE=2 SV=1
2	3.7	1	Q53G71	Q53G71_HUMAN	Calreticulin variant (Fragment) OS=Homo sapiens PE=2 SV=1
2	4.9	1	A6NLU5	VTM2B_HUMAN	V-set and transmembrane domain-containing protein 2B OS=Homo sapiens GN=VSTM2B PE=2 SV=2
1.42	14.8	1	K7EQU5	K7EQU5_HUMAN	Poliovirus receptor (Fragment) OS=Homo sapiens GN=PVR PE=4 SV=1
2.01	12	1	Q6IB39	Q6IB39_HUMAN	RNASE6 protein OS=Homo sapiens GN=RNASE6 PE=2 SV=1
2	1.4	1	Q8TAM9	Q8TAM9_HUMAN	Intercellular adhesion molecule 5, telencephalin OS=Homo sapiens GN=ICAM5 PE=2 SV=1
0.19	4.8	1	P04438	HV208_HUMAN	Ig heavy chain V-II region SESS OS=Homo sapiens PE=2 SV=1
2	2.8	1	Q96IY4	CBPB2_HUMAN	Carboxypeptidase B2 OS=Homo sapiens GN=CPB2 PE=1 SV=2
2	2.4	1	Q5CAQ5	Q5CAQ5_HUMAN	Tumor rejection antigen (Gp96) 1 OS=Homo sapiens GN=TRA1 PE=2 SV=1
2	2.3	1	Q9NY97	B3GN2_HUMAN	UDP-GlcNAc:betaGal beta-1,3-N-acetylglucosaminyltransferase 2 OS=Homo sapiens GN=B3GNT2 PE=1 SV=2
2	2.3	1	Q9NZ53	PDXL2_HUMAN	Podocalyxin-like protein 2 OS=Homo sapiens GN=PODXL2 PE=1 SV=1
2	2.1	1	Q53GN8	Q53GN8_HUMAN	Macrophage stimulating 1 (Hepatocyte growth factor-like) variant (Fragment) OS=Homo sapiens PE=2 SV=1
1.1	6.6	1	Q99674	CGRE1_HUMAN	Cell growth regulator with EF hand domain protein 1 OS=Homo sapiens GN=CGREF1 PE=2 SV=2
0.15	4.6	1	Q9BVJ8	Q9BVJ8_HUMAN	HEXA protein (Fragment) OS=Homo sapiens GN=HEXA PE=2 SV=2
0.4	3.8	1	Q6FHI7	Q6FHI7_HUMAN	CA4 protein OS=Homo sapiens GN=CA4 PE=2 SV=1
2	1.7	1	Q9ULF5	S39AA_HUMAN	Zinc transporter ZIP10 OS=Homo sapiens GN=SLC39A10 PE=1 SV=2
2	16	1	R4GMW4	R4GMW4_HUMAN	Splicing factor, arginine/serine-rich 19 (Fragment) OS=Homo sapiens GN=SRA1 PE=4 SV=1
2	3.9	1	Q6IBC3	Q6IBC3_HUMAN	CTSH protein OS=Homo sapiens GN=CTSH PE=2 SV=1
1.92	4.1	1	H0Y3T6	H0Y3T6_HUMAN	45 kDa calcium-binding protein (Fragment) OS=Homo sapiens GN=SDF4 PE=4 SV=1
2	6.5	1	P21246	PTN_HUMAN	Pleiotrophin OS=Homo sapiens GN=PTN PE=1 SV=1
0.2	5.1	1	P23284	PPIB_HUMAN	Peptidyl-prolyl cis-trans isomerase B OS=Homo sapiens GN=PPIB PE=1 SV=2
2	4.5	1	H0YCY8	H0YCY8_HUMAN	Dipeptidyl peptidase 1 exclusion domain chain (Fragment) OS=Homo sapiens GN=CTSC PE=4 SV=1
2	0.8	1	Q2M1J3	Q2M1J3_HUMAN	ROBO1 protein OS=Homo sapiens GN=ROBO1 PE=2 SV=1
0.15	2.6	1	P47972	NPTX2_HUMAN	Neuronal pentraxin-2 OS=Homo sapiens GN=NPTX2 PE=1 SV=2
1.64	8.2	1	J3QS03	J3QS03_HUMAN	Twisted gastrulation protein homolog 1 OS=Homo sapiens GN=TWSG1 PE=4 SV=1
2	12.1	1	Q6NVI1	Q6NVI1_HUMAN	MARCKS protein (Fragment) OS=Homo sapiens GN=MARCKS PE=2 SV=1
2	1.9	1	B7Z9U4	B7Z9U4_HUMAN	cDNA, FLJ78958, highly similar to Calsyntenin-3 OS=Homo sapiens PE=2 SV=1
2	2.1	1	K4DIA0	K4DIA0_HUMAN	ICOS ligand OS=Homo sapiens GN=ICOSLG PE=4 SV=1
0.21	9.3	1	P10153	RNAS2_HUMAN	Non-secretory ribonuclease OS=Homo sapiens GN=RNASE2 PE=1 SV=2
2	8.8	1	Q53XB4	Q53XB4_HUMAN	Full-length cDNA clone CS0DF032YM23 of Fetal brain of Homo sapiens (human) OS=Homo sapiens GN=hCG_2044782 PE=2 SV=1
2	5.3	1	C9J8Z4	C9J8Z4_HUMAN	Immunoglobulin superfamily member 8 (Fragment) OS=Homo sapiens GN=IGSF8 PE=2 SV=1
2	1.9	1	H0YDE5	H0YDE5_HUMAN	UPF0606 protein KIAA1549L (Fragment) OS=Homo sapiens GN=KIAA1549L PE=4 SV=1
2	13.4	1	A4D158	A4D158_HUMAN	Neuropeptide Y OS=Homo sapiens GN=NPY PE=2 SV=1
2	6	1	Q9NYX4	CALY_HUMAN	Neuron-specific vesicular protein calcyon OS=Homo sapiens GN=CALY PE=1 SV=1
1.32	2.6	1	Q86TV4	Q86TV4_HUMAN	Full-length cDNA clone CS0DI085YI08 of Placenta of Homo sapiens (human) (Fragment) OS=Homo sapiens PE=2 SV=1
2	9.2	1	Q5NV83	Q5NV83_HUMAN	V3-3 protein (Fragment) OS=Homo sapiens GN=IGLV7-46 PE=4 SV=1
2	2	1	P29120	NEC1_HUMAN	Neuroendocrine convertase 1 OS=Homo sapiens GN=PCSK1 PE=1 SV=2
1.03	9.2	1	Q5U058	Q5U058_HUMAN	Growth associated protein 43 OS=Homo sapiens GN=GAP43 PE=2 SV=1
2	2.3	1	Q5JVE7	Q5JVE7_HUMAN	Coagulation factor X OS=Homo sapiens GN=F10 PE=2 SV=1
0.21	2.1	1	H7C215	H7C215_HUMAN	Reticulon-4 receptor (Fragment) OS=Homo sapiens GN=RTN4R PE=4 SV=1
2	3.3	1	Q2TSD0	Q2TSD0_HUMAN	Glyceraldehyde-3-phosphate dehydrogenase OS=Homo sapiens PE=2 SV=1
0.53	2.5	1	J3KP07	J3KP07_HUMAN	Growth arrest-specific protein 6 OS=Homo sapiens GN=GAS6 PE=4 SV=1
2	12.6	1	C7DJS2	C7DJS2_HUMAN	Glutathione S-transferase pi (Fragment) OS=Homo sapiens GN=GSTP1 PE=2 SV=1
2	2.4	1	B2RBG3	B2RBG3_HUMAN	cDNA, FLJ95493, highly similar to Homo sapiens fucosidase, alpha-L- 1, tissue (FUCA1), mRNA OS=Homo sapiens PE=2 SV=1
2	3.2	1	Q5JTD5	Q5JTD5_HUMAN	cDNA FLJ50818, highly similar to Protein YIPF3 OS=Homo sapiens PE=2 SV=1
1.89	19.3	1	F5H7R9	F5H7R9_HUMAN	Parathymosin (Fragment) OS=Homo sapiens GN=PTMS PE=2 SV=1
1.47	4.9	1	P30043	BLVRB_HUMAN	Flavin reductase (NADPH) OS=Homo sapiens GN=BLVRB PE=1 SV=3
2	9.1	1	P01771	HV310_HUMAN	Ig heavy chain V-III region HIL OS=Homo sapiens PE=1 SV=1
0.52	6.1	1	R4GMY4	R4GMY4_HUMAN	Neuroblastoma suppressor of tumorigenicity 1 (Fragment) OS=Homo sapiens GN=NBL1 PE=4 SV=1
2.02	1.8	1	Q5FWE3	PRRT3_HUMAN	Proline-rich transmembrane protein 3 OS=Homo sapiens GN=PRRT3 PE=1 SV=3
1.64	14.2	1	A2IPI6	A2IPI6_HUMAN	HRV Fab 027-VL (Fragment) OS=Homo sapiens PE=2 SV=1
1.34	16.5	1	Q5NV70	Q5NV70_HUMAN	V1-11 protein (Fragment) OS=Homo sapiens GN=V1-11 PE=4 SV=1
2	4.1	1	B3KXJ2	B3KXJ2_HUMAN	cDNA FLJ45536 fis, clone BRTHA2031917, highly similar to Ciliary neurotrophic factor receptor alpha OS=Homo sapiens PE=2 SV=1
2.04	1.7	1	Q06033	ITIH3_HUMAN	Inter-alpha-trypsin inhibitor heavy chain H3 OS=Homo sapiens GN=ITIH3 PE=1 SV=2
2	2.6	1	Q53FL7	Q53FL7_HUMAN	Vascular cell adhesion molecule 1 isoform a variant (Fragment) OS=Homo sapiens PE=2 SV=1
0.09	2.3	1	O75628	REM1_HUMAN	REVERSED GTP-binding protein REM 1 OS=Homo sapiens GN=REM1 PE=1 SV=2
2	2.1	1	Q53HU8	Q53HU8_HUMAN	Vimentin variant (Fragment) OS=Homo sapiens PE=2 SV=1
2	1.4	1	Q17RA0	Q17RA0_HUMAN	Interleukin 6 signal transducer (Gp130, oncostatin M receptor) OS=Homo sapiens GN=IL6ST PE=2 SV=1
1.07	3.2	1	Q5STZ8	Q5STZ8_HUMAN	ATP-binding cassette sub-family F member 1 (Fragment) OS=Homo sapiens GN=ABCF1 PE=2 SV=2
2	14.3	1	P23582	ANFC_HUMAN	C-type natriuretic peptide OS=Homo sapiens GN=NPPC PE=1 SV=1
2	1.1	1	P39059	COFA1_HUMAN	Collagen alpha-1(XV) chain OS=Homo sapiens GN=COL15A1 PE=1 SV=2
0.93	1.3	1	Q9UN70	PCDGK_HUMAN	Protocadherin gamma-C3 OS=Homo sapiens GN=PCDHGC3 PE=1 SV=1
2	5.6	1	P20851	C4BPB_HUMAN	C4b-binding protein beta chain OS=Homo sapiens GN=C4BPB PE=1 SV=1
2	1.3	1	P14543	NID1_HUMAN	Nidogen-1 OS=Homo sapiens GN=NID1 PE=1 SV=3
0.86	3.3	1	Q5HYM1	Q5HYM1_HUMAN	Putative uncharacterized protein DKFZp686O1553 (Fragment) OS=Homo sapiens GN=DKFZp686O1553 PE=1 SV=1
2	1.7	1	D6RAR4	D6RAR4_HUMAN	Hepatocyte growth factor activator OS=Homo sapiens GN=HGFAC PE=2 SV=1
1.66	6.5	1	A6XND1	A6XND1_HUMAN	Insulin-like growth factor binding protein 3 isoform b OS=Homo sapiens PE=2 SV=1
0.17	0.7	1	Q6P9G8	Q6P9G8_HUMAN	Family with sequence similarity 184, member A OS=Homo sapiens GN=FAM184A PE=2 SV=2
2	3.9	1	Q8N7M0	TC1D1_HUMAN	REVERSED Tctex1 domain-containing protein 1 OS=Homo sapiens GN=TCTEX1D1 PE=2 SV=2
2.12	10.6	1	Q9NPD7	NRN1_HUMAN	Neuritin OS=Homo sapiens GN=NRN1 PE=1 SV=1
2	2.6	1	Q6ZNA0	Q6ZNA0_HUMAN	cDNA FLJ16290 fis, clone OCBBF2019684, highly similar to ZINC FINGER PROTEIN 29 OS=Homo sapiens PE=2 SV=1
0.61	1.7	1	Q6AW96	Q6AW96_HUMAN	Putative uncharacterized protein DKFZp686A20205 OS=Homo sapiens GN=DKFZp686A20205 PE=2 SV=1
2	1.6	1	Q15375	EPHA7_HUMAN	Ephrin type-A receptor 7 OS=Homo sapiens GN=EPHA7 PE=1 SV=3
1.17	10.5	1	Q5BLP8	CD048_HUMAN	Neuropeptide-like protein C4orf48 OS=Homo sapiens GN=C4orf48 PE=1 SV=3
2	2.1	1	O60462-5	NRP2_HUMAN	Isoform B5 of Neuropilin-2 OS=Homo sapiens GN=NRP2
0.72	4.9	1	B5MCZ9	B5MCZ9_HUMAN	Glutaminyl-peptide cyclotransferase (Fragment) OS=Homo sapiens GN=QPCT PE=2 SV=1
2	6.9	1	C9J8S2	C9J8S2_HUMAN	Retinoic acid receptor responder protein 2 (Fragment) OS=Homo sapiens GN=RARRES2 PE=2 SV=1
2.01	1.6	1	Q5VST3	Q5VST3_HUMAN	Protein O-linked-mannose beta-1,2-N-acetylglucosaminyltransferase 1 OS=Homo sapiens GN=POMGNT1 PE=2 SV=1
2	5.6	1	B8ZWD9	B8ZWD9_HUMAN	Diazepam binding inhibitor, splice form 1D(2) OS=Homo sapiens GN=DBI PE=2 SV=1
0.11	2.7	1	Q15223	PVRL1_HUMAN	Poliovirus receptor-related protein 1 OS=Homo sapiens GN=PVRL1 PE=1 SV=3
2	1	1	Q1L838	Q1L838_HUMAN	GTBP-ALT OS=Homo sapiens GN=GTBP PE=3 SV=1
0.17	0.5	1	P49454	CENPF_HUMAN	Centromere protein F OS=Homo sapiens GN=CENPF PE=1 SV=2
2	5.7	1	Q9NSI5	IGSF5_HUMAN	Immunoglobulin superfamily member 5 OS=Homo sapiens GN=IGSF5 PE=2 SV=2
1.17	2.3	1	P16499	PDE6A_HUMAN	Rod cGMP-specific 3',5'-cyclic phosphodiesterase subunit alpha OS=Homo sapiens GN=PDE6A PE=1 SV=4
2	0.8	1	J3KQ96	J3KQ96_HUMAN	Treacle protein (Fragment) OS=Homo sapiens GN=TCOF1 PE=4 SV=1
2	1.1	1	Q8IV28	Q8IV28_HUMAN	NID2 protein OS=Homo sapiens GN=NID2 PE=2 SV=1
2	3.4	1	Q96KC0	Q96KC0_HUMAN	cDNA FLJ14373 fis, clone HEMBA1001595, highly similar to SEPTIN 2 HOMOLOG OS=Homo sapiens PE=2 SV=1
0.8	2.4	1	B3KQE3	B3KQE3_HUMAN	cDNA FLJ90319 fis, clone NT2RP2001538, highly similar to Paired amphipathic helix protein Sin3a OS=Homo sapiens PE=2 SV=1
2.01	8.9	1	P02776	PLF4_HUMAN	Platelet factor 4 OS=Homo sapiens GN=PF4 PE=1 SV=2
2	21.1	1	Q14645	Q14645_HUMAN	REVERSED Interferon alpha-2' (Fragment) OS=Homo sapiens PE=3 SV=1
2.02	1.1	1	A9X9L0	A9X9L0_HUMAN	Desmocollin 2 OS=Homo sapiens GN=DSC2 PE=2 SV=1
0.91	7.6	1	A2NB43	A2NB43_HUMAN	Cold agglutinin FS-1 H-chain (Fragment) OS=Homo sapiens GN=IGH@ PE=2 SV=1
2	2.7	1	Q9NZU7	CABP1_HUMAN	Calcium-binding protein 1 OS=Homo sapiens GN=CABP1 PE=1 SV=5
0.06	13.4	1	P01616	KV203_HUMAN	Ig kappa chain V-II region MIL OS=Homo sapiens PE=1 SV=1
2	3.2	1	Q59EM4	Q59EM4_HUMAN	Dipeptidyl-peptidase II variant (Fragment) OS=Homo sapiens PE=2 SV=1
0.09	5.9	1	Q9UL73	Q9UL73_HUMAN	Myosin-reactive immunoglobulin heavy chain variable region (Fragment) OS=Homo sapiens PE=2 SV=1
0.13	3.9	1	Q5JP01	Q5JP01_HUMAN	Histone-binding protein RBBP7 (Fragment) OS=Homo sapiens GN=RBBP7 PE=2 SV=1
0.12	0.8	1	E9PD53	E9PD53_HUMAN	REVERSED Structural maintenance of chromosomes protein OS=Homo sapiens GN=SMC4 PE=2 SV=1
2	1.1	1	G3V4V5	G3V4V5_HUMAN	E3 ubiquitin-protein ligase HECTD1 (Fragment) OS=Homo sapiens GN=HECTD1 PE=2 SV=1
0.15	7.3	1	Q7Z6V2	Q7Z6V2_HUMAN	Plasma alpha-L-fucosidase (Fragment) OS=Homo sapiens GN=FUCA2 PE=2 SV=1
0.15	1	1	B5MEF5	B5MEF5_HUMAN	REVERSED Sushi, nidogen and EGF-like domain-containing protein 1 OS=Homo sapiens GN=SNED1 PE=2 SV=2
2	1.5	1	Q53EY9	Q53EY9_HUMAN	F-box only protein 22 isoform a variant (Fragment) OS=Homo sapiens PE=2 SV=1
2	1.2	1	B4DTV8	B4DTV8_HUMAN	cDNA FLJ61399, highly similar to Spectrin alpha chain, brain OS=Homo sapiens PE=2 SV=1
2	1.3	1	Q68CS5	Q68CS5_HUMAN	Putative uncharacterized protein DKFZp781L0846 OS=Homo sapiens GN=DKFZp781L0846 PE=2 SV=1
0.25	6.1	1	B4E200	B4E200_HUMAN	cDNA FLJ57929, moderately similar to Peptidyl-prolyl cis-trans isomerase C (EC5.2.1.8) OS=Homo sapiens PE=2 SV=1
2	1	1	Q8IZC4	RTKN2_HUMAN	REVERSED Rhotekin-2 OS=Homo sapiens GN=RTKN2 PE=2 SV=1
0.46	5.7	1	A6NJ16	IV4F8_HUMAN	Putative V-set and immunoglobulin domain-containing-like protein IGHV4OR15-8 OS=Homo sapiens GN=IGHV4OR15-8 PE=5 SV=2
0.09	1.6	1	F5GYH2	F5GYH2_HUMAN	Lysine-specific demethylase 4C OS=Homo sapiens GN=KDM4C PE=2 SV=1
2	2.5	1	B4DRS4	B4DRS4_HUMAN	cDNA FLJ60139, highly similar to Homo sapiens HIV TAT specific factor 1 (HTATSF1), mRNA OS=Homo sapiens PE=2 SV=1
2	0.7	1	Q5TB80	CE162_HUMAN	Centrosomal protein of 162 kDa OS=Homo sapiens GN=KIAA1009 PE=1 SV=2
2	1.9	1	Q8IYW5	RN168_HUMAN	E3 ubiquitin-protein ligase RNF168 OS=Homo sapiens GN=RNF168 PE=1 SV=1
1	1.1	1	Q9UPM8	AP4E1_HUMAN	AP-4 complex subunit epsilon-1 OS=Homo sapiens GN=AP4E1 PE=1 SV=2
0.22	1.7	1	P13667	PDIA4_HUMAN	REVERSED Protein disulfide-isomerase A4 OS=Homo sapiens GN=PDIA4 PE=1 SV=2
1.21	9.4	1	J3KST8	J3KST8_HUMAN	Cytokine receptor-like factor 3 OS=Homo sapiens GN=CRLF3 PE=4 SV=1
2	7.2	1	Q9UJ94	CU104_HUMAN	Putative uncharacterized protein encoded C21orf104 OS=Homo sapiens GN=LINC00527 PE=5 SV=2
2	1.2	1	P42702	LIFR_HUMAN	Leukemia inhibitory factor receptor OS=Homo sapiens GN=LIFR PE=1 SV=1
2	8	1	Q6PI41	Q6PI41_HUMAN	AURKAIP1 protein (Fragment) OS=Homo sapiens GN=AURKAIP1 PE=2 SV=1
2.01	0.5	1	Q6NUR1	Q6NUR1_HUMAN	Non-SMC condensin I complex, subunit G OS=Homo sapiens GN=NCAPG PE=2 SV=1
2	0.3	1	K9MS24	K9MS24_HUMAN	Beta-spectrin non-erythrocytic 1 OS=Homo sapiens GN=SPTBN1 PE=2 SV=1
2	0.7	1	J3KTN9	J3KTN9_HUMAN	Probable E3 ubiquitin-protein ligase MARCH10 OS=Homo sapiens GN=MARCH10 PE=4 SV=1
0.77	3.5	1	B7Z856	B7Z856_HUMAN	GDNF family receptor alpha-1 OS=Homo sapiens GN=GFRA1 PE=2 SV=1
0.15	1.8	1	Q9BYG8	GSDMC_HUMAN	Gasdermin-C OS=Homo sapiens GN=GSDMC PE=2 SV=3
0.5	1.2	1	F5H0N2	F5H0N2_HUMAN	Neuregulin-2 OS=Homo sapiens GN=NRG2 PE=2 SV=1
2	3.2	1	Q9H2S6	TNMD_HUMAN	REVERSED Tenomodulin OS=Homo sapiens GN=TNMD PE=2 SV=1
2	3.4	1	H3BLU9	H3BLU9_HUMAN	REVERSED Tetratricopeptide repeat protein 24 (Fragment) OS=Homo sapiens GN=TTC24 PE=4 SV=1
2.01	0.2	1	Q13813-2	SPTN1_HUMAN	REVERSED Isoform 2 of Spectrin alpha chain, non-erythrocytic 1 OS=Homo sapiens GN=SPTAN1
0.5	1.4	1	G3V5P6	G3V5P6_HUMAN	Papilin OS=Homo sapiens GN=PAPLN PE=2 SV=1
2	6.1	1	B2R773	B2R773_HUMAN	cDNA, FLJ93312, highly similar to Homo sapiens adipose most abundant gene transcript 1 (APM1), mRNA OS=Homo sapiens PE=2 SV=1
2	5	1	J3QLK5	J3QLK5_HUMAN	Serine/threonine-protein kinase tousled-like 2 OS=Homo sapiens GN=TLK2 PE=4 SV=1
0.18	2.8	1	Q2YD88	Q2YD88_HUMAN	FAM129B protein (Fragment) OS=Homo sapiens GN=FAM129B PE=2 SV=1
2	6.4	1	Q6P3S4	Q6P3S4_HUMAN	CEBPA protein OS=Homo sapiens PE=2 SV=1
0.48	13.4	1	I3L3R4	I3L3R4_HUMAN	REVERSED Smoothelin-like protein 2 (Fragment) OS=Homo sapiens GN=SMTNL2 PE=2 SV=1
2	2.7	1	A0PJE0	A0PJE0_HUMAN	EHMT1 protein (Fragment) OS=Homo sapiens GN=EHMT1 PE=2 SV=1
0.41	2.6	1	A6NCF6	MA13P_HUMAN	Putative MAGE domain-containing protein MAGEA13P OS=Homo sapiens GN=MAGEA13P PE=5 SV=1
0.26	0.4	1	H0Y6I0	H0Y6I0_HUMAN	Golgin subfamily A member 4 (Fragment) OS=Homo sapiens GN=GOLGA4 PE=2 SV=1
2	4.5	1	F5GXS5	F5GXS5_HUMAN	Apolipoprotein F OS=Homo sapiens GN=APOF PE=2 SV=1
2	0.5	1	H0YFN7	H0YFN7_HUMAN	REVERSED Protein RIC1 homolog (Fragment) OS=Homo sapiens GN=KIAA1432 PE=4 SV=1
1.21	7.6	1	Q16192	Q16192_HUMAN	Orf3 5' of PD-ECGF/TP protein OS=Homo sapiens GN=orf3 5' of PD-ECGF/TP PE=2 SV=1
0.15	2.8	1	Q9BYV8-5	CEP41_HUMAN	Isoform 5 of Centrosomal protein of 41 kDa OS=Homo sapiens GN=CEP41
0.56	0.6	1	P08F94	PKHD1_HUMAN	Fibrocystin OS=Homo sapiens GN=PKHD1 PE=1 SV=1
2	0.7	1	E9PHY8	E9PHY8_HUMAN	Maestro heat-like repeat-containing protein family member 1 OS=Homo sapiens GN=MROH1 PE=2 SV=1
2	6.3	1	Q2VIL4	Q2VIL4_HUMAN	RcDNAJ9 (Fragment) OS=Homo sapiens PE=4 SV=1
2	1.7	1	H0YDE2	H0YDE2_HUMAN	Pleckstrin homology domain-containing family A member 7 (Fragment) OS=Homo sapiens GN=PLEKHA7 PE=4 SV=1
2	7	1	Q59GA9	Q59GA9_HUMAN	Phosphodiesterase 1B, calmodulin-dependent variant (Fragment) OS=Homo sapiens PE=2 SV=1
0.68	11.7	1	P01707	LV204_HUMAN	Ig lambda chain V-II region TRO OS=Homo sapiens PE=1 SV=1
1.59	2.3	1	H9KV63	H9KV63_HUMAN	Tudor domain-containing protein 1 OS=Homo sapiens GN=TDRD1 PE=2 SV=1
0.16	2.4	1	C9JC36	C9JC36_HUMAN	REVERSED Serine palmitoyltransferase 3 OS=Homo sapiens GN=SPTLC3 PE=2 SV=2
1.34	7.1	1	A2NYU7	A2NYU7_HUMAN	Heavy chain Fab (Fragment) OS=Homo sapiens PE=2 SV=1
2	0.8	1	Q9Y4D7	PLXD1_HUMAN	Plexin-D1 OS=Homo sapiens GN=PLXND1 PE=1 SV=3
2	1.7	1	Q53FR6	Q53FR6_HUMAN	Cartilage oligomeric matrix protein variant (Fragment) OS=Homo sapiens PE=2 SV=1
2	2.7	1	D1MER9	D1MER9_HUMAN	Glycoprotein V (Platelet) OS=Homo sapiens GN=GP5 PE=2 SV=1
2	7.6	1	Q8TBD0	Q8TBD0_HUMAN	Uncharacterized protein (Fragment) OS=Homo sapiens PE=2 SV=1
0.11	41.4	1	C6GLX9	C6GLX9_HUMAN	Putative uncharacterized protein OS=Homo sapiens PE=4 SV=1
2	0.9	1	Q9HC39	Q9HC39_HUMAN	REVERSED Putative uncharacterized protein OS=Homo sapiens PE=2 SV=1
0.39	2	1	B4DJB3	B4DJB3_HUMAN	cDNA FLJ55979, highly similar to Homo sapiens AE binding protein 1 (AEBP1), mRNA OS=Homo sapiens PE=2 SV=1
2	3.2	1	Q15554	TERF2_HUMAN	Telomeric repeat-binding factor 2 OS=Homo sapiens GN=TERF2 PE=1 SV=2
2	8.7	1	J3QKX8	J3QKX8_HUMAN	Src kinase-associated phosphoprotein 1 OS=Homo sapiens GN=SKAP1 PE=4 SV=1
0.19	1.4	1	C9J6G4	C9J6G4_HUMAN	WAP, Kazal, immunoglobulin, Kunitz and NTR domain-containing protein 2 OS=Homo sapiens GN=WFIKKN2 PE=2 SV=1
2	0.7	1	Q24JP5	T132A_HUMAN	Transmembrane protein 132A OS=Homo sapiens GN=TMEM132A PE=2 SV=1
0.26	0.4	1	Q59FG9	Q59FG9_HUMAN	Chondroitin sulfate proteoglycan 2 (Versican) variant (Fragment) OS=Homo sapiens PE=2 SV=1
1.2	7.1	1	Q6FGG5	Q6FGG5_HUMAN	SCRG1 protein OS=Homo sapiens GN=SCRG1 PE=2 SV=1
0.07	0.5	1	Q4LE67	Q4LE67_HUMAN	CSPG3 variant protein (Fragment) OS=Homo sapiens GN=CSPG3 variant protein PE=2 SV=1
0.81	4.1	1	H0YEB6	H0YEB6_HUMAN	REVERSED Sjoegren syndrome/scleroderma autoantigen 1 (Fragment) OS=Homo sapiens GN=SSSCA1 PE=2 SV=1
2	2	1	A8K5A9	A8K5A9_HUMAN	cDNA FLJ77532, highly similar to Homo sapiens zinc finger and SCAN domain containing 2 (ZSCAN2), transcript variant 1, mRNA OS=Homo sapiens PE=2 SV=1
0.38	7.4	1	Q99969	RARR2_HUMAN	Retinoic acid receptor responder protein 2 OS=Homo sapiens GN=RARRES2 PE=1 SV=1
2	0.4	1	Q9Y2E4	DIP2C_HUMAN	Disco-interacting protein 2 homolog C OS=Homo sapiens GN=DIP2C PE=2 SV=2
1.75	2.5	1	F5H4W9	F5H4W9_HUMAN	Serum paraoxonase/arylesterase 1 OS=Homo sapiens GN=PON1 PE=2 SV=1
2.14	3.1	1	B4DLJ9	B4DLJ9_HUMAN	Biotinidase OS=Homo sapiens GN=BTD PE=2 SV=1
2.01	6.6	1	Q6FHW3	Q6FHW3_HUMAN	DF protein OS=Homo sapiens GN=DF PE=2 SV=1
2.01	1.1	1	Q66GS9	CP135_HUMAN	REVERSED Centrosomal protein of 135 kDa OS=Homo sapiens GN=CEP135 PE=1 SV=2
0.06	2	1	J3KRK0	J3KRK0_HUMAN	Serine/threonine-protein kinase tousled-like 2 (Fragment) OS=Homo sapiens GN=TLK2 PE=3 SV=1
2	0.4	1	Q9HCE0	EPG5_HUMAN	REVERSED Ectopic P granules protein 5 homolog OS=Homo sapiens GN=EPG5 PE=2 SV=2
0.22	1.6	1	A4D0Y6	A4D0Y6_HUMAN	G protein-coupled receptor 37 (Endothelin receptor type B-like) OS=Homo sapiens GN=GPR37 PE=2 SV=1
0.38	1.8	1	B3KMI3	B3KMI3_HUMAN	Spastic paraplegia 20, spartin (Troyer syndrome), isoform CRA_b OS=Homo sapiens GN=SPG20 PE=2 SV=1
2	2.2	1	P07205	PGK2_HUMAN	Phosphoglycerate kinase 2 OS=Homo sapiens GN=PGK2 PE=1 SV=3
0.21	2.3	1	B4DSR1	B4DSR1_HUMAN	REVERSED cDNA FLJ58730 OS=Homo sapiens PE=2 SV=1
2	3.5	1	J3KQW6	J3KQW6_HUMAN	Tripartite motif-containing protein 73 OS=Homo sapiens GN=TRIM73 PE=4 SV=1
2	1.1	1	Q8NCM2	KCNH5_HUMAN	Potassium voltage-gated channel subfamily H member 5 OS=Homo sapiens GN=KCNH5 PE=1 SV=3
1.01	8.5	1	G3V0Z9	G3V0Z9_HUMAN	HCG2043033, isoform CRA_b OS=Homo sapiens GN=LYNX1 PE=2 SV=1
2	5.2	1	J3KQY1	J3KQY1_HUMAN	REVERSED 39S ribosomal protein L22, mitochondrial OS=Homo sapiens GN=MRPL22 PE=3 SV=1
2	0.3	1	Q9UKA4	AKA11_HUMAN	A-kinase anchor protein 11 OS=Homo sapiens GN=AKAP11 PE=1 SV=1
0.2	4.6	1	Q53GA9	Q53GA9_HUMAN	Transmembrane 4 superfamily member 3 variant (Fragment) OS=Homo sapiens PE=2 SV=1
2	5.1	1	B3KNT3	B3KNT3_HUMAN	Steroid receptor RNA activator 1, isoform CRA_a OS=Homo sapiens GN=SRA1 PE=2 SV=1
0.51	3.5	1	A1XBS5	F92A1_HUMAN	Protein FAM92A1 OS=Homo sapiens GN=FAM92A1 PE=2 SV=2
0.48	0.4	1	H7BZ41	H7BZ41_HUMAN	Lipoxygenase homology domain-containing protein 1 OS=Homo sapiens GN=LOXHD1 PE=4 SV=2
2	2.1	1	B7ZMD6	B7ZMD6_HUMAN	IRGQ protein OS=Homo sapiens GN=IRGQ PE=2 SV=1
0.25	1.5	1	D6RDG4	D6RDG4_HUMAN	REVERSED Centrosomal protein POC5 OS=Homo sapiens GN=POC5 PE=2 SV=1
0.46	0.1	1	Q8WXI7	MUC16_HUMAN	Mucin-16 OS=Homo sapiens GN=MUC16 PE=1 SV=2
0.22	0.9	1	Q9BYX2	TBD2A_HUMAN	TBC1 domain family member 2A OS=Homo sapiens GN=TBC1D2 PE=1 SV=3
0.2	9.5	1	P61278	SMS_HUMAN	Somatostatin OS=Homo sapiens GN=SST PE=1 SV=1
0.21	6	1	C9JR52	C9JR52_HUMAN	Pleiotrophin OS=Homo sapiens GN=PTN PE=2 SV=1
2	0.6	1	Q86W24	NAL14_HUMAN	NACHT, LRR and PYD domains-containing protein 14 OS=Homo sapiens GN=NLRP14 PE=2 SV=1
2	5	1	D3DVS7	D3DVS7_HUMAN	DNA segment on chromosome 4 (Unique) 234 expressed sequence, isoform CRA_a OS=Homo sapiens GN=D4S234E PE=2 SV=1
0.1	0.5	1	D3YTG3	D3YTG3_HUMAN	Target of Nesh-SH3 OS=Homo sapiens GN=ABI3BP PE=2 SV=1
0.2	4	1	H7C1Q2	H7C1Q2_HUMAN	REVERSED SET domain-containing protein 5 (Fragment) OS=Homo sapiens GN=SETD5 PE=4 SV=1
2	2.2	1	A8MUV8	ZN727_HUMAN	Putative zinc finger protein 727 OS=Homo sapiens GN=ZNF727 PE=5 SV=3
2	0.7	1	Q7Z2Z1	TICRR_HUMAN	Treslin OS=Homo sapiens GN=TICRR PE=1 SV=2
0.49	10	1	P81605	DCD_HUMAN	Dermcidin OS=Homo sapiens GN=DCD PE=1 SV=2
2	2	1	Q5TA95	Q5TA95_HUMAN	Tetratricopeptide repeat domain 4, isoform CRA_a OS=Homo sapiens GN=TTC4 PE=2 SV=1
0.06	0.2	1	B1WB49	B1WB49_HUMAN	BDP1 protein (Fragment) OS=Homo sapiens GN=BDP1 PE=2 SV=1
0.2	1.9	1	P23352	KALM_HUMAN	Anosmin-1 OS=Homo sapiens GN=KAL1 PE=1 SV=3
0.2	5.7	1	L8E8V8	L8E8V8_HUMAN	REVERSED Alternative protein C1orf106 OS=Homo sapiens GN=C1orf106 PE=4 SV=1
0.2	1.2	1	P35251	RFC1_HUMAN	Replication factor C subunit 1 OS=Homo sapiens GN=RFC1 PE=1 SV=4
0.18	0.5	1	Q149M9-3	NWD1_HUMAN	REVERSED Isoform 3 of NACHT and WD repeat domain-containing protein 1 OS=Homo sapiens GN=NWD1
0.3	4.7	1	Q8TBP5	F174A_HUMAN	Membrane protein FAM174A OS=Homo sapiens GN=FAM174A PE=2 SV=1
0.86	13.6	1	H3BQX6	H3BQX6_HUMAN	Metallothionein OS=Homo sapiens GN=MT3 PE=2 SV=1
0.19	1.2	1	A8K1Z4	A8K1Z4_HUMAN	cDNA FLJ76704, highly similar to Homo sapiens leukemia inhibitory factor receptor (LIFR), mRNA OS=Homo sapiens PE=2 SV=1
0.43	14.5	1	L0R8D2	L0R8D2_HUMAN	Alternative protein RCOR1 OS=Homo sapiens GN=RCOR1 PE=4 SV=1
2	2.7	1	B5A940	B5A940_HUMAN	Soluble MET variant 12 OS=Homo sapiens GN=MET PE=2 SV=1
2	6	1	Q53HE2	Q53HE2_HUMAN	Triosephosphate isomerase (Fragment) OS=Homo sapiens PE=2 SV=1
0.06	0.6	1	R4GNA2	R4GNA2_HUMAN	REVERSED Ankyrin repeat domain-containing protein 30A OS=Homo sapiens GN=ANKRD30A PE=4 SV=1
2	1.6	1	B3KPF3	B3KPF3_HUMAN	REVERSED cDNA FLJ31722 fis, clone NT2RI2006679, highly similar to Homo sapiens follistatin-like 4 (FSTL4), mRNA OS=Homo sapiens PE=2 SV=1
0.05	0.6	1	Q9BZQ8	NIBAN_HUMAN	REVERSED Protein Niban OS=Homo sapiens GN=FAM129A PE=1 SV=1
1.41	2	1	Q7Z7B1	PIGW_HUMAN	REVERSED Phosphatidylinositol-glycan biosynthesis class W protein OS=Homo sapiens GN=PIGW PE=2 SV=1
0.16	2	1	B3KWF4	B3KWF4_HUMAN	cDNA FLJ42944 fis, clone BRSTN2004863, highly similar to PolypeptideN-acetylgalactosaminyltransferase 11 (EC 2.4.1.41) OS=Homo sapiens PE=2 SV=1
0.46	2.3	1	B4DVX1	B4DVX1_HUMAN	cDNA FLJ56555, highly similar to Wiskott-Aldrich syndrome protein-interacting protein OS=Homo sapiens PE=2 SV=1
2	1.2	1	Q15283	RASA2_HUMAN	REVERSED Ras GTPase-activating protein 2 OS=Homo sapiens GN=RASA2 PE=2 SV=3
0.26	2.3	1	Q92743	HTRA1_HUMAN	Serine protease HTRA1 OS=Homo sapiens GN=HTRA1 PE=1 SV=1
2	14.1	1	Q6FHK1	Q6FHK1_HUMAN	MRPL28 protein (Fragment) OS=Homo sapiens GN=MRPL28 PE=2 SV=1
2	5.7	1	F8WFD9	F8WFD9_HUMAN	Protein shisa-5 OS=Homo sapiens GN=SHISA5 PE=2 SV=1
2	10.7	1	H3BQD0	H3BQD0_HUMAN	Cerebellin OS=Homo sapiens GN=CBLN1 PE=2 SV=1
0.08	0.9	1	Q5SSJ5	HP1B3_HUMAN	Heterochromatin protein 1-binding protein 3 OS=Homo sapiens GN=HP1BP3 PE=1 SV=1
2	1.3	1	H0Y4I5	H0Y4I5_HUMAN	Chondroadherin-like protein (Fragment) OS=Homo sapiens GN=CHADL PE=4 SV=1
2	3.3	1	B4E2S7	B4E2S7_HUMAN	Lysosome-associated membrane glycoprotein 2 OS=Homo sapiens GN=LAMP2 PE=2 SV=1
2.1	10.7	1	A2NJV5	A2NJV5_HUMAN	Kappa light chain variable region (Fragment) OS=Homo sapiens GN=IGKV A18 PE=4 SV=1
2	6.3	1	F1T0L6	F1T0L6_HUMAN	Complexin 4, isoform CRA_b OS=Homo sapiens GN=CPLX4 PE=2 SV=1
0.74	5.3	1	Q9H2P1	Q9H2P1_HUMAN	DC16 OS=Homo sapiens PE=2 SV=1
0.54	1	1	Q59FU1	Q59FU1_HUMAN	Protein tyrosine phosphatase, receptor type, N variant (Fragment) OS=Homo sapiens PE=2 SV=1
2	1	1	Q6PCC8	Q6PCC8_HUMAN	URB2 protein (Fragment) OS=Homo sapiens GN=URB2 PE=2 SV=1

## Sheet: Schizophrenia
Unused	% Cov (95)	Peptides(95%)	Accession No.	Uniprot ID	Protein Name
439.03	92	2295	P02768	ALBU_HUMAN	Serum albumin OS=Homo sapiens GN=ALB PE=1 SV=2
2	90	2175	B2RBS8	B2RBS8_HUMAN	cDNA, FLJ95666, highly similar to Homo sapiens albumin (ALB), mRNA OS=Homo sapiens PE=2 SV=1
2	95.7	2127	F6KPG5	F6KPG5_HUMAN	Albumin (Fragment) OS=Homo sapiens PE=2 SV=1
4	88.9	1751	B4DPR2	B4DPR2_HUMAN	cDNA FLJ50830, highly similar to Serum albumin OS=Homo sapiens PE=2 SV=1
6	90.2	1716	Q56G89	Q56G89_HUMAN	Serum albumin OS=Homo sapiens PE=2 SV=1
173.28	77.5	569	P02787	TRFE_HUMAN	Serotransferrin OS=Homo sapiens GN=TF PE=1 SV=3
6	75.1	546	B4E1B2	B4E1B2_HUMAN	cDNA FLJ53691, highly similar to Serotransferrin OS=Homo sapiens PE=2 SV=1
4.21	73.1	332	Q6N089	Q6N089_HUMAN	Putative uncharacterized protein DKFZp686P15220 OS=Homo sapiens GN=DKFZp686P15220 PE=1 SV=1
86.88	69.5	330	Q6GMX6	Q6GMX6_HUMAN	IGH@ protein OS=Homo sapiens GN=IGH@ PE=1 SV=1
2.02	71.7	323	Q6MZV7	Q6MZV7_HUMAN	Putative uncharacterized protein DKFZp686C11235 OS=Homo sapiens GN=DKFZp686C11235 PE=1 SV=1
119.7	85.2	299	E9KL23	E9KL23_HUMAN	Epididymis secretory sperm binding protein Li 44a OS=Homo sapiens PE=2 SV=1
7.12	67.6	299	Q6MZQ6	Q6MZQ6_HUMAN	Putative uncharacterized protein DKFZp686G11190 OS=Homo sapiens GN=DKFZp686G11190 PE=1 SV=1
2	60.4	290	Q7Z351	Q7Z351_HUMAN	Putative uncharacterized protein DKFZp686N02209 OS=Homo sapiens GN=DKFZp686N02209 PE=2 SV=1
205.08	72.7	285	P01024	CO3_HUMAN	Complement C3 OS=Homo sapiens GN=C3 PE=1 SV=2
6.07	64.6	263	Q6N094	Q6N094_HUMAN	Putative uncharacterized protein DKFZp686O01196 OS=Homo sapiens GN=DKFZp686O01196 PE=1 SV=1
6.23	68.8	250	Q6N093	Q6N093_HUMAN	Putative uncharacterized protein DKFZp686I04196 (Fragment) OS=Homo sapiens GN=DKFZp686I04196 PE=1 SV=1
35.3	65.1	232	Q6PJF2	Q6PJF2_HUMAN	IGK@ protein OS=Homo sapiens GN=IGK@ PE=1 SV=1
11.95	80.4	228	P01861	IGHG4_HUMAN	Ig gamma-4 chain C region OS=Homo sapiens GN=IGHG4 PE=1 SV=1
4	52.8	227	Q68CN4	Q68CN4_HUMAN	Putative uncharacterized protein DKFZp686E23209 OS=Homo sapiens GN=DKFZp686E23209 PE=1 SV=2
0.3	44.9	225	Q7Z3Y4	Q7Z3Y4_HUMAN	Uncharacterized protein OS=Homo sapiens PE=1 SV=1
0.23	78.8	220	P01859	IGHG2_HUMAN	Ig gamma-2 chain C region OS=Homo sapiens GN=IGHG2 PE=1 SV=2
0.51	64.2	217	Q6MZU6	Q6MZU6_HUMAN	Putative uncharacterized protein DKFZp686C15213 OS=Homo sapiens GN=DKFZp686C15213 PE=1 SV=1
32.54	52.5	215	Q6GMX0	Q6GMX0_HUMAN	Uncharacterized protein OS=Homo sapiens PE=2 SV=1
0.05	56.4	211	Q6PIL8	Q6PIL8_HUMAN	IGK@ protein OS=Homo sapiens GN=IGK@ PE=1 SV=1
36.11	85.9	198	D1MGQ2	D1MGQ2_HUMAN	Alpha-2 globin chain OS=Homo sapiens GN=HBA2 PE=2 SV=1
25.5	52.9	163	Q6MZX7	Q6MZX7_HUMAN	Putative uncharacterized protein DKFZp686M24218 OS=Homo sapiens GN=DKFZp686M24218 PE=1 SV=1
20.45	55.7	162	Q5EBM2	Q5EBM2_HUMAN	Uncharacterized protein OS=Homo sapiens PE=2 SV=1
8.17	57.4	162	B0UZ83	B0UZ83_HUMAN	Complement C4 beta chain OS=Homo sapiens GN=C4A PE=2 SV=1
156.4	55.9	160	P0C0L5	CO4B_HUMAN	Complement C4-B OS=Homo sapiens GN=C4B PE=1 SV=2
147.68	65.9	160	P01023	A2MG_HUMAN	Alpha-2-macroglobulin OS=Homo sapiens GN=A2M PE=1 SV=3
2	57.1	156	Q6N030	Q6N030_HUMAN	Putative uncharacterized protein DKFZp686I15212 OS=Homo sapiens GN=DKFZp686I15212 PE=1 SV=1
42.55	79.6	146	E9KL36	E9KL36_HUMAN	Epididymis tissue sperm binding protein Li 4a OS=Homo sapiens PE=2 SV=1
38.71	84.7	129	P41222	PTGDS_HUMAN	Prostaglandin-H2 D-isomerase OS=Homo sapiens GN=PTGDS PE=1 SV=1
56.89	76.4	128	P02647	APOA1_HUMAN	Apolipoprotein A-I OS=Homo sapiens GN=APOA1 PE=1 SV=1
66.63	66.9	123	P02790	HEMO_HUMAN	Hemopexin OS=Homo sapiens GN=HPX PE=1 SV=2
6	49.6	118	P0C0L4	CO4A_HUMAN	Complement C4-A OS=Homo sapiens GN=C4A PE=1 SV=2
57.64	52.8	114	P10909	CLUS_HUMAN	Clusterin OS=Homo sapiens GN=CLU PE=1 SV=1
37.72	93.9	114	D9YZU5	D9YZU5_HUMAN	Hemoglobin, beta OS=Homo sapiens GN=HBB PE=2 SV=1
47.16	66.9	109	P02649	APOE_HUMAN	Apolipoprotein E OS=Homo sapiens GN=APOE PE=1 SV=1
47.92	52.4	98	Q86U78	Q86U78_HUMAN	Angiotensinogen (Serine (Or cysteine) proteinase inhibitor, clade A (Alpha-1 antiproteinase, antitrypsin), member 8) OS=Homo sapiens PE=2 SV=1
99.55	63.4	87	A5PL27	A5PL27_HUMAN	CP protein OS=Homo sapiens GN=CP PE=2 SV=1
57.79	53	84	Q8N4S1	Q8N4S1_HUMAN	Proliferation-inducing protein 33 OS=Homo sapiens GN=SPARCL1 PE=2 SV=1
25.88	54.1	84	Q8N5F4	Q8N5F4_HUMAN	IGL@ protein OS=Homo sapiens GN=IGL@ PE=1 SV=1
0.14	54.2	83	Q6GMX4	Q6GMX4_HUMAN	IGL@ protein OS=Homo sapiens GN=IGL@ PE=1 SV=1
2	53	82	Q14515	SPRL1_HUMAN	SPARC-like protein 1 OS=Homo sapiens GN=SPARCL1 PE=1 SV=2
4.28	40.2	82	Q6NS95	Q6NS95_HUMAN	IGL@ protein OS=Homo sapiens GN=IGL@ PE=2 SV=1
31.13	67.1	81	P01034	CYTC_HUMAN	Cystatin-C OS=Homo sapiens GN=CST3 PE=1 SV=1
56.92	60.1	81	D6RF35	D6RF35_HUMAN	Vitamin D-binding protein OS=Homo sapiens GN=GC PE=2 SV=1
50.31	58	79	G3V5I3	G3V5I3_HUMAN	Alpha-1-antichymotrypsin OS=Homo sapiens GN=SERPINA3 PE=2 SV=1
57.36	66	77	P00738	HPT_HUMAN	Haptoglobin OS=Homo sapiens GN=HP PE=1 SV=1
29.82	47.8	71	P02763	A1AG1_HUMAN	Alpha-1-acid glycoprotein 1 OS=Homo sapiens GN=ORM1 PE=1 SV=1
10.91	91.2	69	A0N071	A0N071_HUMAN	Delta globin OS=Homo sapiens GN=HBD PE=2 SV=1
39.43	47.4	65	P36955	PEDF_HUMAN	Pigment epithelium-derived factor OS=Homo sapiens GN=SERPINF1 PE=1 SV=4
51.63	47.3	64	P06396	GELS_HUMAN	Gelsolin OS=Homo sapiens GN=GSN PE=1 SV=1
6.13	45.1	64	Q6PIK1	Q6PIK1_HUMAN	IGL@ protein OS=Homo sapiens GN=IGL@ PE=2 SV=1
2	45.1	63	Q6GMW4	Q6GMW4_HUMAN	IGL@ protein OS=Homo sapiens GN=IGL@ PE=2 SV=1
18.73	67	62	P02652	APOA2_HUMAN	Apolipoprotein A-II OS=Homo sapiens GN=APOA2 PE=1 SV=1
89.56	30.9	61	P02751	FINC_HUMAN	Fibronectin OS=Homo sapiens GN=FN1 PE=1 SV=4
2	32.3	61	B7ZLE5	B7ZLE5_HUMAN	FN1 protein OS=Homo sapiens GN=FN1 PE=2 SV=1
76.17	52.6	60	E7EUF1	E7EUF1_HUMAN	Ectonucleotide pyrophosphatase/phosphodiesterase family member 2 OS=Homo sapiens GN=ENPP2 PE=2 SV=1
48.46	44.3	60	P05060	SCG1_HUMAN	Secretogranin-1 OS=Homo sapiens GN=CHGB PE=1 SV=2
43.31	47.6	59	P01008	ANT3_HUMAN	Antithrombin-III OS=Homo sapiens GN=SERPINC1 PE=1 SV=1
36.79	41.2	58	E9KL26	E9KL26_HUMAN	Epididymis tissue protein Li 173 OS=Homo sapiens PE=2 SV=1
45.44	56.9	56	Q96K68	Q96K68_HUMAN	cDNA FLJ14473 fis, clone MAMMA1001080, highly similar to Homo sapiens SNC73 protein (SNC73) mRNA OS=Homo sapiens PE=2 SV=1
0.16	44.4	56	Q5FWF9	Q5FWF9_HUMAN	IGL@ protein OS=Homo sapiens GN=IGL@ PE=2 SV=1
4	89.1	55	Q4TZM4	Q4TZM4_HUMAN	Hemoglobin beta chain (Fragment) OS=Homo sapiens GN=HBB PE=3 SV=1
20.21	50.7	55	P02765	FETUA_HUMAN	Alpha-2-HS-glycoprotein OS=Homo sapiens GN=AHSG PE=1 SV=1
4	45.2	53	B4DEA7	B4DEA7_HUMAN	cDNA FLJ58131, highly similar to Secretogranin-1 OS=Homo sapiens PE=2 SV=1
14.01	47.8	52	P19652	A1AG2_HUMAN	Alpha-1-acid glycoprotein 2 OS=Homo sapiens GN=ORM2 PE=1 SV=2
2.06	85.9	52	I1VZV6	I1VZV6_HUMAN	Hemoglobin alpha 1 OS=Homo sapiens GN=HBA1 PE=3 SV=1
70.17	34	51	B4E1Z4	B4E1Z4_HUMAN	Complement factor B OS=Homo sapiens GN=CFB PE=2 SV=1
32.64	40.8	51	P51693	APLP1_HUMAN	Amyloid-like protein 1 OS=Homo sapiens GN=APLP1 PE=1 SV=3
0.54	26.5	51	Q569I7	Q569I7_HUMAN	Uncharacterized protein OS=Homo sapiens PE=2 SV=1
2	62.2	49	B7Z1F8	B7Z1F8_HUMAN	cDNA FLJ53025, highly similar to Complement C4-B OS=Homo sapiens PE=2 SV=1
26.98	58	47	Q9UBP4	DKK3_HUMAN	Dickkopf-related protein 3 OS=Homo sapiens GN=DKK3 PE=1 SV=2
2	53.8	46	Q6N092	Q6N092_HUMAN	Putative uncharacterized protein DKFZp686K18196 (Fragment) OS=Homo sapiens GN=DKFZp686K18196 PE=1 SV=1
2	44	45	P08603	CFAH_HUMAN	Complement factor H OS=Homo sapiens GN=CFH PE=1 SV=4
71.79	44	45	A8K5T0	A8K5T0_HUMAN	cDNA FLJ75416, highly similar to Homo sapiens complement factor H (CFH), mRNA OS=Homo sapiens PE=2 SV=1
51.81	33.3	45	Q92823	NRCAM_HUMAN	Neuronal cell adhesion molecule OS=Homo sapiens GN=NRCAM PE=1 SV=3
37.63	58.8	44	P04217	A1BG_HUMAN	Alpha-1B-glycoprotein OS=Homo sapiens GN=A1BG PE=1 SV=4
4	54.6	44	Q6PQ81	Q6PQ81_HUMAN	Putative tumor suppressor Dkk-3/REIC OS=Homo sapiens GN=DKK3 PE=2 SV=1
10.73	61.5	43	F5H6I0	F5H6I0_HUMAN	Beta-2-microglobulin form pI 5.3 OS=Homo sapiens GN=B2M PE=2 SV=1
57.8	40.7	42	B3KX75	B3KX75_HUMAN	cDNA FLJ44930 fis, clone BRAMY3015549, highly similar to Neural cell adhesion molecule L1-like protein (Fragment) OS=Homo sapiens PE=2 SV=1
40.82	62.7	42	A8K1K1	A8K1K1_HUMAN	cDNA FLJ76342, highly similar to Homo sapiens carnosine dipeptidase 1 (metallopeptidase M20 family)(CNDP1), mRNA OS=Homo sapiens PE=2 SV=1
35.66	37.1	41	P05067	A4_HUMAN	Amyloid beta A4 protein OS=Homo sapiens GN=APP PE=1 SV=3
39.91	60.4	40	P06727	APOA4_HUMAN	Apolipoprotein A-IV OS=Homo sapiens GN=APOA4 PE=1 SV=3
4	65.1	40	A0M8Q6	LAC7_HUMAN	Ig lambda-7 chain C region OS=Homo sapiens GN=IGLC7 PE=1 SV=2
18.62	39.5	39	C9JF17	C9JF17_HUMAN	Apolipoprotein D (Fragment) OS=Homo sapiens GN=APOD PE=2 SV=1
1.77	47.1	39	Q9NPP6	Q9NPP6_HUMAN	Immunoglobulin heavy chain variant (Fragment) OS=Homo sapiens PE=2 SV=1
18.47	48.1	38	C9JV77	C9JV77_HUMAN	Alpha-2-HS-glycoprotein OS=Homo sapiens GN=AHSG PE=2 SV=1
3.7	93.3	37	Q3LR79	Q3LR79_HUMAN	Hemoglobin beta (Fragment) OS=Homo sapiens GN=HBB PE=3 SV=1
43.81	34.9	35	O94985-2	CSTN1_HUMAN	Isoform 2 of Calsyntenin-1 OS=Homo sapiens GN=CLSTN1
28.4	49.7	34	P10645	CMGA_HUMAN	Chromogranin-A OS=Homo sapiens GN=CHGA PE=1 SV=7
48.75	35.3	34	Q12860	CNTN1_HUMAN	Contactin-1 OS=Homo sapiens GN=CNTN1 PE=1 SV=1
16.39	36.3	34	F2YQ21	F2YQ21_HUMAN	Osteopontin-D OS=Homo sapiens PE=2 SV=1
4	46.1	34	Q86TT1	Q86TT1_HUMAN	Full-length cDNA clone CS0DD006YL02 of Neuroblastoma of Homo sapiens (human) OS=Homo sapiens PE=2 SV=1
37.6	32.5	33	B7ZKJ8	B7ZKJ8_HUMAN	35 kDa inter-alpha-trypsin inhibitor heavy chain H4 OS=Homo sapiens GN=ITIH4 PE=2 SV=1
8.28	43.3	33	Q7Z379	Q7Z379_HUMAN	Putative uncharacterized protein DKFZp686K04218 (Fragment) OS=Homo sapiens GN=DKFZp686K04218 PE=1 SV=1
26.6	42.6	31	P25311	ZA2G_HUMAN	Zinc-alpha-2-glycoprotein OS=Homo sapiens GN=AZGP1 PE=1 SV=2
15.57	60.4	30	P00441	SODC_HUMAN	Superoxide dismutase [Cu-Zn] OS=Homo sapiens GN=SOD1 PE=1 SV=2
49.19	47.8	30	P00734	THRB_HUMAN	Prothrombin OS=Homo sapiens GN=F2 PE=1 SV=2
37.25	29	30	P13591	NCAM1_HUMAN	Neural cell adhesion molecule 1 OS=Homo sapiens GN=NCAM1 PE=1 SV=3
26.09	55.2	28	D9IWP9	D9IWP9_HUMAN	Beta-2-glycoprotein I (Fragment) OS=Homo sapiens PE=2 SV=1
30.52	35	28	P23142	FBLN1_HUMAN	Fibulin-1 OS=Homo sapiens GN=FBLN1 PE=1 SV=4
20.37	69.7	27	Q92876	KLK6_HUMAN	Kallikrein-6 OS=Homo sapiens GN=KLK6 PE=1 SV=1
43.14	42.4	27	P00747	PLMN_HUMAN	Plasminogen OS=Homo sapiens GN=PLG PE=1 SV=2
2	25.3	26	Q6N041	Q6N041_HUMAN	Putative uncharacterized protein DKFZp686O16217 (Fragment) OS=Homo sapiens GN=DKFZp686O16217 PE=2 SV=1
38.3	41.9	25	Q8WXD2	SCG3_HUMAN	Secretogranin-3 OS=Homo sapiens GN=SCG3 PE=1 SV=3
8.45	32.5	25	B4DUV1	B4DUV1_HUMAN	cDNA FLJ53207, highly similar to Homo sapiens fibulin 1 (FBLN1), transcript variant C, mRNA OS=Homo sapiens PE=2 SV=1
38.63	26.9	25	Q14CA1	Q14CA1_HUMAN	NRCAM protein OS=Homo sapiens GN=NRCAM PE=2 SV=1
30.46	42.3	24	B2R8I2	B2R8I2_HUMAN	cDNA, FLJ93914, highly similar to Homo sapiens histidine-rich glycoprotein (HRG), mRNA OS=Homo sapiens PE=2 SV=1
16	39.7	24	Q16270	IBP7_HUMAN	Insulin-like growth factor-binding protein 7 OS=Homo sapiens GN=IGFBP7 PE=1 SV=1
2	30.8	24	P00739	HPTR_HUMAN	Haptoglobin-related protein OS=Homo sapiens GN=HPR PE=1 SV=2
0.5	51.1	24	B4DID6	B4DID6_HUMAN	cDNA FLJ52545, highly similar to Dickkopf-related protein 3 OS=Homo sapiens PE=2 SV=1
2	43.3	23	D3DNU8	D3DNU8_HUMAN	Kininogen 1, isoform CRA_a OS=Homo sapiens GN=KNG1 PE=4 SV=1
20.93	31.6	22	P08697	A2AP_HUMAN	Alpha-2-antiplasmin OS=Homo sapiens GN=SERPINF2 PE=1 SV=3
22.81	35.7	22	B4DI63	B4DI63_HUMAN	cDNA FLJ59205, highly similar to Mimecan OS=Homo sapiens PE=2 SV=1
30.57	29.5	22	B4E1C2	B4E1C2_HUMAN	Kininogen 1, isoform CRA_b OS=Homo sapiens GN=KNG1 PE=2 SV=1
34.1	34.7	21	P43652	AFAM_HUMAN	Afamin OS=Homo sapiens GN=AFM PE=1 SV=1
24.36	42.4	20	O15240	VGF_HUMAN	Neurosecretory protein VGF OS=Homo sapiens GN=VGF PE=1 SV=2
6	28.2	20	P07998	RNAS1_HUMAN	Ribonuclease pancreatic OS=Homo sapiens GN=RNASE1 PE=1 SV=4
25.99	24	20	B7Z625	B7Z625_HUMAN	cDNA FLJ55521, highly similar to Protein kinase C-binding protein NELL2 OS=Homo sapiens PE=2 SV=1
34.99	33.5	20	P10643	CO7_HUMAN	Complement component C7 OS=Homo sapiens GN=C7 PE=1 SV=2
16.17	48.7	20	A2KBC4	A2KBC4_HUMAN	Anti-TN-C scFv (Fragment) OS=Homo sapiens PE=2 SV=1
1.49	33.3	19	B2R6W1	B2R6W1_HUMAN	cDNA, FLJ93143, highly similar to Homo sapiens complement component 7 (C7), mRNA OS=Homo sapiens PE=2 SV=1
18.03	26.4	19	D9ZGG2	D9ZGG2_HUMAN	Vitronectin OS=Homo sapiens GN=VTN PE=2 SV=1
25.4	21.9	19	Q5T985	Q5T985_HUMAN	Inter-alpha-trypsin inhibitor heavy chain H2 OS=Homo sapiens GN=ITIH2 PE=2 SV=1
4.3	44.4	19	P01602	KV110_HUMAN	Ig kappa chain V-I region HK102 (Fragment) OS=Homo sapiens GN=IGKV1-5 PE=4 SV=1
22.13	46	19	O43505	B3GN1_HUMAN	N-acetyllactosaminide beta-1,3-N-acetylglucosaminyltransferase OS=Homo sapiens GN=B3GNT1 PE=1 SV=1
8.28	7	18	P02452	CO1A1_HUMAN	Collagen alpha-1(I) chain OS=Homo sapiens GN=COL1A1 PE=1 SV=5
18.04	40.3	18	A8K050	A8K050_HUMAN	cDNA FLJ75376, highly similar to Homo sapiens peptidoglycan recognition protein L (PGLYRP) mRNA OS=Homo sapiens PE=2 SV=1
11.27	50.9	18	Q9UL77	Q9UL77_HUMAN	Myosin-reactive immunoglobulin light chain variable region (Fragment) OS=Homo sapiens PE=1 SV=1
20.83	26.2	18	A8K3E4	A8K3E4_HUMAN	cDNA FLJ78367, highly similar to Homo sapiens fibrinogen, A alpha polypeptide (FGA), transcriptvariant alpha, mRNA OS=Homo sapiens PE=2 SV=1
33.8	5.4	18	C0JYY2	C0JYY2_HUMAN	Apolipoprotein B (Including Ag(X) antigen) OS=Homo sapiens GN=APOB PE=4 SV=1
25.55	33.5	18	B7Z549	B7Z549_HUMAN	cDNA FLJ56821, highly similar to Inter-alpha-trypsin inhibitor heavy chain H1 OS=Homo sapiens PE=2 SV=1
21.79	38.2	18	P51884	LUM_HUMAN	Lumican OS=Homo sapiens GN=LUM PE=1 SV=2
30.86	23.3	18	A1L3A3	A1L3A3_HUMAN	Contactin 2 (Axonal) OS=Homo sapiens GN=CNTN2 PE=2 SV=1
4.17	23	18	B1AHL2	B1AHL2_HUMAN	Fibulin-1 OS=Homo sapiens GN=FBLN1 PE=2 SV=1
22.21	29.4	17	B3KNX0	B3KNX0_HUMAN	cDNA FLJ30621 fis, clone CTONG2001681, highly similar to Complement C1s subcomponent (EC 3.4.21.42) OS=Homo sapiens PE=2 SV=1
17.42	33	17	O95502	NPTXR_HUMAN	Neuronal pentraxin receptor OS=Homo sapiens GN=NPTXR PE=2 SV=2
22.55	40.7	17	Q32Q65	Q32Q65_HUMAN	Fibrinogen beta chain OS=Homo sapiens GN=FGB PE=2 SV=1
24.76	29.2	16	P13521	SCG2_HUMAN	Secretogranin-2 OS=Homo sapiens GN=SCG2 PE=1 SV=2
20.2	36.4	16	P07339	CATD_HUMAN	Cathepsin D OS=Homo sapiens GN=CTSD PE=1 SV=1
22.76	38.4	16	F1C4A7	F1C4A7_HUMAN	Monocyte differentiation antigen CD14 OS=Homo sapiens GN=CD14 PE=3 SV=1
24.1	43.5	16	P16870	CBPE_HUMAN	Carboxypeptidase E OS=Homo sapiens GN=CPE PE=1 SV=1
24.34	30.3	16	Q8IVC0	Q8IVC0_HUMAN	Serpin peptidase inhibitor, clade D (Heparin cofactor), member 1 OS=Homo sapiens GN=SERPIND1 PE=2 SV=1
18	38.3	16	Q68CK4	Q68CK4_HUMAN	Leucine-rich alpha-2-glycoprotein OS=Homo sapiens GN=HMFT1766 PE=2 SV=1
25.6	30.3	16	B4DPQ0	B4DPQ0_HUMAN	cDNA FLJ54471, highly similar to Complement C1r subcomponent (EC 3.4.21.41) OS=Homo sapiens PE=2 SV=1
22.85	36.7	15	P01871	IGHM_HUMAN	Ig mu chain C region OS=Homo sapiens GN=IGHM PE=1 SV=3
24.87	10.6	15	Q9Y4C0	NRX3A_HUMAN	Neurexin-3 OS=Homo sapiens GN=NRXN3 PE=1 SV=4
24.4	16	15	Q9UIU0	Q9UIU0_HUMAN	Dihydropyridine receptor alpha 2 subunit OS=Homo sapiens GN=CACNA2D1 PE=4 SV=1
26.42	37.5	15	B2R815	B2R815_HUMAN	cDNA, FLJ93695, highly similar to Homo sapiens serpin peptidase inhibitor, clade A (alpha-1 antiproteinase, antitrypsin), member 4 (SERPINA4), mRNA OS=Homo sapiens PE=2 SV=1
12.23	54.2	15	P08294	SODE_HUMAN	Extracellular superoxide dismutase [Cu-Zn] OS=Homo sapiens GN=SOD3 PE=1 SV=2
25.41	16.8	15	P12109	CO6A1_HUMAN	Collagen alpha-1(VI) chain OS=Homo sapiens GN=COL6A1 PE=1 SV=3
27.26	29.8	15	B4DVE1	B4DVE1_HUMAN	cDNA FLJ53478, highly similar to Galectin-3-binding protein OS=Homo sapiens PE=2 SV=1
2	28.5	15	H6VRG1	H6VRG1_HUMAN	Keratin 1 OS=Homo sapiens GN=KRT1 PE=2 SV=1
14.02	66.7	15	D3GKD8	D3GKD8_HUMAN	A-gamma globin Osilo variant OS=Homo sapiens GN=HBG1 PE=3 SV=1
22.31	31	14	P02748	CO9_HUMAN	Complement component C9 OS=Homo sapiens GN=C9 PE=1 SV=2
19.24	15.9	14	Q14118	DAG1_HUMAN	Dystroglycan OS=Homo sapiens GN=DAG1 PE=1 SV=2
26.02	4.4	14	P98160	PGBM_HUMAN	Basement membrane-specific heparan sulfate proteoglycan core protein OS=Homo sapiens GN=HSPG2 PE=1 SV=4
8	26.3	14	B4DQI1	B4DQI1_HUMAN	Complement C2b fragment OS=Homo sapiens GN=C2 PE=2 SV=1
8	41.3	14	Q0ZCH9	Q0ZCH9_HUMAN	Immunglobulin heavy chain variable region (Fragment) OS=Homo sapiens PE=4 SV=1
22.6	18.3	14	P19021	AMD_HUMAN	Peptidyl-glycine alpha-amidating monooxygenase OS=Homo sapiens GN=PAM PE=1 SV=2
2	44.9	14	B7Z556	B7Z556_HUMAN	cDNA FLJ56822, highly similar to Alpha-2-HS-glycoprotein OS=Homo sapiens PE=2 SV=1
20.88	28	14	A8KAJ3	A8KAJ3_HUMAN	cDNA FLJ77823, highly similar to Homo sapiens EGF-containing fibulin-like extracellular matrix protein 1, transcript variant 3, mRNA OS=Homo sapiens PE=2 SV=1
10.01	19.5	13	B2R9F2	B2R9F2_HUMAN	cDNA, FLJ94361, highly similar to Homo sapiens serine (or cysteine) proteinase inhibitor, clade A(alpha-1 antiproteinase, antitrypsin), member 6 (SERPINA6), mRNA OS=Homo sapiens PE=2 SV=1
18.88	36.4	13	P02760	AMBP_HUMAN	Protein AMBP OS=Homo sapiens GN=AMBP PE=1 SV=1
21.21	12	13	Q92859	NEO1_HUMAN	Neogenin OS=Homo sapiens GN=NEO1 PE=1 SV=2
26.31	5.4	13	Q9Y6R7	FCGBP_HUMAN	IgGFc-binding protein OS=Homo sapiens GN=FCGBP PE=1 SV=3
24.97	36.9	13	C9JEU5	C9JEU5_HUMAN	Fibrinogen gamma chain OS=Homo sapiens GN=FGG PE=2 SV=1
20.82	27.1	13	G3XAM2	G3XAM2_HUMAN	Complement factor I light chain OS=Homo sapiens GN=CFI PE=2 SV=1
2	38.3	13	P02750	A2GL_HUMAN	Leucine-rich alpha-2-glycoprotein OS=Homo sapiens GN=LRG1 PE=1 SV=2
16.31	55.2	13	P00915	CAH1_HUMAN	Carbonic anhydrase 1 OS=Homo sapiens GN=CA1 PE=1 SV=2
8.09	30.3	13	F8VYK9	F8VYK9_HUMAN	Insulin-like growth factor-binding protein 6 OS=Homo sapiens GN=IGFBP6 PE=2 SV=1
16.14	20.2	13	A0PJJ4	A0PJJ4_HUMAN	LRRC4B protein (Fragment) OS=Homo sapiens GN=LRRC4B PE=2 SV=1
2	14.8	13	Q65ZC8	Q65ZC8_HUMAN	Single-chain Fv (Fragment) OS=Homo sapiens GN=scFv PE=2 SV=1
24.02	21.8	12	O75326	SEM7A_HUMAN	Semaphorin-7A OS=Homo sapiens GN=SEMA7A PE=1 SV=1
15.97	20.6	12	Q9NSD0	Q9NSD0_HUMAN	Protein S OS=Homo sapiens PE=2 SV=1
23.6	30.5	12	A4D2D2	A4D2D2_HUMAN	Procollagen C-endopeptidase enhancer OS=Homo sapiens GN=PCOLCE PE=4 SV=1
16.95	67.3	12	Q5VY30	Q5VY30_HUMAN	Plasma retinol-binding protein(1-182) OS=Homo sapiens GN=RBP4 PE=2 SV=1
20	24.2	12	B3KUE5	B3KUE5_HUMAN	Phospholipid transfer protein OS=Homo sapiens GN=PLTP PE=2 SV=1
20.93	30.7	12	Q9NQ79	CRAC1_HUMAN	Cartilage acidic protein 1 OS=Homo sapiens GN=CRTAC1 PE=1 SV=2
16.24	15.3	12	P13671	CO6_HUMAN	Complement component C6 OS=Homo sapiens GN=C6 PE=1 SV=3
2	27.8	12	P01609	KV117_HUMAN	Ig kappa chain V-I region Scw OS=Homo sapiens PE=1 SV=1
14.01	40.6	12	B2R582	B2R582_HUMAN	cDNA, FLJ92374, highly similar to Homo sapiens C-type lectin domain family 3, member B (CLEC3B), mRNA OS=Homo sapiens PE=2 SV=1
15.27	19.3	12	Q53GU8	Q53GU8_HUMAN	Transforming growth factor, beta-induced, 68kDa variant (Fragment) OS=Homo sapiens PE=2 SV=1
0.08	25.8	12	A2N7P4	A2N7P4_HUMAN	Immunoglobulin mu-chain D-J4-region (Fragment) OS=Homo sapiens GN=IGHM PE=4 SV=1
8.34	56.7	12	Q0ZCJ4	Q0ZCJ4_HUMAN	Immunglobulin heavy chain variable region (Fragment) OS=Homo sapiens PE=4 SV=1
19.85	38.8	12	B3KQQ7	B3KQQ7_HUMAN	cDNA PSEC0037 fis, clone NT2RP1000800, highly similar to N-acetyllactosaminidebeta-1,3-N-acetylglucosaminyltransferase OS=Homo sapiens PE=2 SV=1
20.83	4.7	11	J3KQ66	J3KQ66_HUMAN	Reelin OS=Homo sapiens GN=RELN PE=4 SV=1
8.18	21	11	Q86XR1	Q86XR1_HUMAN	Major prion protein (Fragment) OS=Homo sapiens GN=PRNP PE=2 SV=1
20.57	6.5	11	Q7Z7M0	MEGF8_HUMAN	Multiple epidermal growth factor-like domains protein 8 OS=Homo sapiens GN=MEGF8 PE=1 SV=2
20.87	22.9	11	O00391	QSOX1_HUMAN	Sulfhydryl oxidase 1 OS=Homo sapiens GN=QSOX1 PE=1 SV=3
2	14.5	11	Q96QS0	Q96QS0_HUMAN	Putative matrix cell adhesion molecule-3 OS=Homo sapiens PE=1 SV=1
4	32.5	11	P01743	HV102_HUMAN	Ig heavy chain V-I region HG3 OS=Homo sapiens PE=4 SV=1
2.21	36.7	11	A2J1M2	A2J1M2_HUMAN	Rheumatoid factor RF-IP9 (Fragment) OS=Homo sapiens PE=2 SV=1
16.63	19.9	11	Q53HU9	Q53HU9_HUMAN	Complement component 1, r subcomponent variant (Fragment) OS=Homo sapiens PE=2 SV=1
4.05	24.5	11	D9YZU8	D9YZU8_HUMAN	Hemoglobin, gamma A OS=Homo sapiens GN=HBG1 PE=2 SV=1
17.26	36.8	10	D3DQH8	D3DQH8_HUMAN	Secreted protein, acidic, cysteine-rich (Osteonectin), isoform CRA_a OS=Homo sapiens GN=SPARC PE=2 SV=1
16.21	31.9	10	P36222	CH3L1_HUMAN	Chitinase-3-like protein 1 OS=Homo sapiens GN=CHI3L1 PE=1 SV=2
14.58	15.7	10	Q59EN5	Q59EN5_HUMAN	Prosaposin variant (Fragment) OS=Homo sapiens PE=2 SV=1
15.61	18.7	10	Q16610	ECM1_HUMAN	Extracellular matrix protein 1 OS=Homo sapiens GN=ECM1 PE=1 SV=2
13.46	42.7	10	Q92520	FAM3C_HUMAN	Protein FAM3C OS=Homo sapiens GN=FAM3C PE=1 SV=1
18.47	6.2	10	P12259	FA5_HUMAN	Coagulation factor V OS=Homo sapiens GN=F5 PE=1 SV=4
14	21.9	10	P05543	THBG_HUMAN	Thyroxine-binding globulin OS=Homo sapiens GN=SERPINA7 PE=1 SV=2
15.3	26.8	10	Q53HP2	Q53HP2_HUMAN	Tripeptidyl-peptidase I variant (Fragment) OS=Homo sapiens PE=2 SV=1
14.83	7.5	10	P01031	CO5_HUMAN	Complement C5 OS=Homo sapiens GN=C5 PE=1 SV=4
2	6	10	Q59EG0	Q59EG0_HUMAN	Basement membrane-specific heparan sulfate proteoglycan core protein variant (Fragment) OS=Homo sapiens PE=2 SV=1
2	36.1	10	Q9Y509	Q9Y509_HUMAN	VH3 protein (Fragment) OS=Homo sapiens GN=VH3 PE=1 SV=1
14	21.4	10	P05154	IPSP_HUMAN	Plasma serine protease inhibitor OS=Homo sapiens GN=SERPINA5 PE=1 SV=3
2	20.5	10	P23083	HV103_HUMAN	Ig heavy chain V-I region V35 OS=Homo sapiens PE=1 SV=1
18.79	26.6	10	B4DRT3	B4DRT3_HUMAN	Pyruvate kinase OS=Homo sapiens PE=2 SV=1
14.53	8.8	10	E7ERL8	E7ERL8_HUMAN	Neurexin-1-beta OS=Homo sapiens GN=NRXN1 PE=2 SV=1
0.52	50.6	10	E9PHK0	E9PHK0_HUMAN	Tetranectin OS=Homo sapiens GN=CLEC3B PE=2 SV=1
2.01	33.3	10	P01766	HV305_HUMAN	Ig heavy chain V-III region BRO OS=Homo sapiens PE=1 SV=1
16.08	39.6	9	Q9UHG2	PCSK1_HUMAN	ProSAAS OS=Homo sapiens GN=PCSK1N PE=1 SV=1
15.93	16.3	9	Q06481	APLP2_HUMAN	Amyloid-like protein 2 OS=Homo sapiens GN=APLP2 PE=1 SV=2
15.38	16.4	9	D3DSC5	D3DSC5_HUMAN	Neural cell adhesion molecule 2, isoform CRA_a (Fragment) OS=Homo sapiens GN=NCAM2 PE=2 SV=1
4	50.4	9	P04433	KV309_HUMAN	Ig kappa chain V-III region VG (Fragment) OS=Homo sapiens PE=1 SV=1
10.14	9.5	9	P08123	CO1A2_HUMAN	Collagen alpha-2(I) chain OS=Homo sapiens GN=COL1A2 PE=1 SV=7
11.61	4.8	9	C9JFM0	C9JFM0_HUMAN	Receptor-type tyrosine-protein phosphatase zeta OS=Homo sapiens GN=PTPRZ1 PE=2 SV=1
2	36.2	9	P01779	HV318_HUMAN	Ig heavy chain V-III region TUR OS=Homo sapiens PE=1 SV=1
17.33	50	9	K7ERG9	K7ERG9_HUMAN	Complement factor D OS=Homo sapiens GN=CFD PE=3 SV=1
8.01	22.7	9	D6R934	D6R934_HUMAN	Complement C1q subcomponent subunit B OS=Homo sapiens GN=C1QB PE=2 SV=1
0.06	12.2	9	A2J1M4	A2J1M4_HUMAN	Rheumatoid factor RF-ET7 (Fragment) OS=Homo sapiens PE=2 SV=1
15.58	15.5	9	F8VVB6	F8VVB6_HUMAN	Protein kinase C-binding protein NELL2 OS=Homo sapiens GN=NELL2 PE=2 SV=1
8	21.3	9	O95973	O95973_HUMAN	VH4 heavy chain variable region (Fragment) OS=Homo sapiens GN=IGM PE=1 SV=1
2.06	15.7	9	D9YZU7	D9YZU7_HUMAN	Hemoglobin, epsilon 1 OS=Homo sapiens GN=HBE1 PE=2 SV=1
12.84	7	9	F5GYC7	F5GYC7_HUMAN	Neurexin-1-beta OS=Homo sapiens GN=NRXN1 PE=2 SV=1
8.2	5.6	8	G5E9G7	G5E9G7_HUMAN	Neurexin 2, isoform CRA_a OS=Homo sapiens GN=NRXN2 PE=2 SV=1
8.13	44.3	8	Q9UL90	Q9UL90_HUMAN	Myosin-reactive immunoglobulin heavy chain variable region (Fragment) OS=Homo sapiens PE=2 SV=1
10.08	22.3	8	H3BLU2	H3BLU2_HUMAN	Limbic system-associated membrane protein (Fragment) OS=Homo sapiens GN=LSAMP PE=2 SV=1
14.1	24.8	8	Q15818	NPTX1_HUMAN	Neuronal pentraxin-1 OS=Homo sapiens GN=NPTX1 PE=2 SV=2
10.74	28.6	8	Q3B7B1	Q3B7B1_HUMAN	PENK protein (Fragment) OS=Homo sapiens GN=PENK PE=2 SV=1
7.74	43.7	8	Q53HV6	Q53HV6_HUMAN	Niemann-Pick disease, type C2 variant (Fragment) OS=Homo sapiens PE=2 SV=1
12.06	15.4	8	P35527	K1C9_HUMAN	Keratin, type I cytoskeletal 9 OS=Homo sapiens GN=KRT9 PE=1 SV=3
14.24	16.2	8	P08253	MMP2_HUMAN	72 kDa type IV collagenase OS=Homo sapiens GN=MMP2 PE=1 SV=2
0.13	36.8	8	A2MYD5	A2MYD5_HUMAN	V2-6 protein (Fragment) OS=Homo sapiens GN=V2-6 PE=4 SV=1
14.17	40.9	8	P60174	TPIS_HUMAN	Triosephosphate isomerase OS=Homo sapiens GN=TPI1 PE=1 SV=3
14	17.6	8	B7ZA94	B7ZA94_HUMAN	cDNA, FLJ79108, highly similar to Complement component C8 beta chain OS=Homo sapiens PE=2 SV=1
0.75	33.6	8	P01596	KV104_HUMAN	Ig kappa chain V-I region CAR OS=Homo sapiens PE=1 SV=1
6.05	31.3	8	P06314	KV404_HUMAN	Ig kappa chain V-IV region B17 OS=Homo sapiens PE=2 SV=1
2	47.9	8	A2MYE2	A2MYE2_HUMAN	A30 protein (Fragment) OS=Homo sapiens GN=A30 PE=4 SV=1
2	33.3	8	Q9UL70	Q9UL70_HUMAN	Myosin-reactive immunoglobulin light chain variable region (Fragment) OS=Homo sapiens PE=1 SV=1
7.16	8.3	7	B7Z9B1	B7Z9B1_HUMAN	cDNA FLJ52398, highly similar to Cadherin-13 OS=Homo sapiens PE=2 SV=1
12.6	3.5	7	E9PCV6	E9PCV6_HUMAN	Collagen alpha-3(VI) chain OS=Homo sapiens GN=COL6A3 PE=2 SV=1
10.48	13.7	7	P13645	K1C10_HUMAN	Keratin, type I cytoskeletal 10 OS=Homo sapiens GN=KRT10 PE=1 SV=6
12.06	17.2	7	J3KQ60	J3KQ60_HUMAN	Inter-alpha-trypsin inhibitor heavy chain H5 OS=Homo sapiens GN=ITIH5 PE=4 SV=1
14	56.2	7	D9IAI1	D9IAI1_HUMAN	Phosphatidylethanolamine-binding protein 1 OS=Homo sapiens PE=2 SV=1
11.35	21.8	7	D3DVW9	D3DVW9_HUMAN	Protein tyrosine phosphatase, non-receptor type substrate 1, isoform CRA_a OS=Homo sapiens GN=PTPNS1 PE=4 SV=1
14.57	19.3	7	Q53GX6	Q53GX6_HUMAN	Nucleobindin 1 variant (Fragment) OS=Homo sapiens PE=2 SV=1
7.02	30.8	7	Q6FHD0	Q6FHD0_HUMAN	SGNE1 protein (Fragment) OS=Homo sapiens GN=SGNE1 PE=2 SV=1
6.86	27.6	7	Q59GA0	Q59GA0_HUMAN	Thy-1 cell surface antigen variant (Fragment) OS=Homo sapiens PE=2 SV=1
10.13	40.9	7	P17900	SAP3_HUMAN	Ganglioside GM2 activator OS=Homo sapiens GN=GM2A PE=1 SV=4
10.26	31.7	7	P18065	IBP2_HUMAN	Insulin-like growth factor-binding protein 2 OS=Homo sapiens GN=IGFBP2 PE=1 SV=2
11.16	18.4	7	Q13228	SBP1_HUMAN	Selenium-binding protein 1 OS=Homo sapiens GN=SELENBP1 PE=1 SV=2
12.83	17.5	7	Q8TAY0	Q8TAY0_HUMAN	Insulin-like growth factor binding protein, acid labile subunit OS=Homo sapiens GN=IGFALS PE=2 SV=1
2.86	42.2	7	P01781	HV320_HUMAN	Ig heavy chain V-III region GAL OS=Homo sapiens PE=1 SV=1
12.25	16.4	7	F8W1Q3	F8W1Q3_HUMAN	Biotinidase OS=Homo sapiens GN=BTD PE=2 SV=1
13.05	8.8	7	P49641	MA2A2_HUMAN	Alpha-mannosidase 2x OS=Homo sapiens GN=MAN2A2 PE=2 SV=3
2.17	46.8	7	P01623	KV305_HUMAN	Ig kappa chain V-III region WOL OS=Homo sapiens PE=1 SV=1
11.31	23.2	7	A8MVZ9	A8MVZ9_HUMAN	Fructose-bisphosphate aldolase OS=Homo sapiens GN=ALDOC PE=2 SV=1
8.35	25.8	7	D6RA08	D6RA08_HUMAN	Complement C1q subcomponent subunit B (Fragment) OS=Homo sapiens GN=C1QB PE=2 SV=1
10	13	6	Q6UXB8	PI16_HUMAN	Peptidase inhibitor 16 OS=Homo sapiens GN=PI16 PE=1 SV=1
11.82	16.4	6	P04180	LCAT_HUMAN	Phosphatidylcholine-sterol acyltransferase OS=Homo sapiens GN=LCAT PE=1 SV=1
6.25	22	6	Q7Z3B1	NEGR1_HUMAN	Neuronal growth regulator 1 OS=Homo sapiens GN=NEGR1 PE=1 SV=3
11.29	8.3	6	P19022	CADH2_HUMAN	Cadherin-2 OS=Homo sapiens GN=CDH2 PE=1 SV=4
10.02	15	6	Q9H0C7	Q9H0C7_HUMAN	Putative uncharacterized protein DKFZp434B0535 OS=Homo sapiens GN=DKFZp434B0535 PE=2 SV=1
12.03	15.5	6	B3KNN9	B3KNN9_HUMAN	cDNA FLJ30070 fis, clone ASTRO2000046, highly similar to CD166 ANTIGEN OS=Homo sapiens PE=2 SV=1
8	40.8	6	O60888	CUTA_HUMAN	Protein CutA OS=Homo sapiens GN=CUTA PE=1 SV=2
2	26.6	6	P01612	KV120_HUMAN	Ig kappa chain V-I region Mev OS=Homo sapiens PE=1 SV=1
0.2	42.1	6	A2JA16	A2JA16_HUMAN	Anti-mucin1 light chain variable region (Fragment) OS=Homo sapiens PE=2 SV=1
7.85	3.8	6	G3XAI2	G3XAI2_HUMAN	Laminin subunit beta-1 OS=Homo sapiens GN=LAMB1 PE=2 SV=1
2.03	29.2	6	P35542	SAA4_HUMAN	Serum amyloid A-4 protein OS=Homo sapiens GN=SAA4 PE=1 SV=2
8	7	6	Q53EL9	SEZ6_HUMAN	Seizure protein 6 homolog OS=Homo sapiens GN=SEZ6 PE=1 SV=2
2	30.7	6	A2JA14	A2JA14_HUMAN	Anti-mucin1 heavy chain variable region (Fragment) OS=Homo sapiens PE=2 SV=1
8.79	25.1	6	B4DF70	B4DF70_HUMAN	cDNA FLJ60461, highly similar to Peroxiredoxin-2 (EC 1.11.1.15) OS=Homo sapiens PE=2 SV=1
11.39	20.4	6	Q8NFZ8	CADM4_HUMAN	Cell adhesion molecule 4 OS=Homo sapiens GN=CADM4 PE=1 SV=1
12	16.8	6	Q8IZZ5	Q8IZZ5_HUMAN	Coagulation factor XII-Mie OS=Homo sapiens PE=2 SV=1
4.77	10.6	6	H7C215	H7C215_HUMAN	Reticulon-4 receptor (Fragment) OS=Homo sapiens GN=RTN4R PE=4 SV=1
10.61	23.2	6	Q2TU84	Q2TU84_HUMAN	Aspartate aminotransferase OS=Homo sapiens GN=GIG18 PE=2 SV=1
4.14	14.3	6	D3DQB3	D3DQB3_HUMAN	Sparc/osteonectin, cwcv and kazal-like domains proteoglycan (Testican) 1, isoform CRA_a OS=Homo sapiens GN=SPOCK1 PE=2 SV=1
8.03	14.4	6	Q9UHL4	DPP2_HUMAN	Dipeptidyl peptidase 2 OS=Homo sapiens GN=DPP7 PE=1 SV=3
10.15	15.8	6	O94919	ENDD1_HUMAN	Endonuclease domain-containing 1 protein OS=Homo sapiens GN=ENDOD1 PE=1 SV=2
2	42.1	6	Q8TCZ8	Q8TCZ8_HUMAN	Apolipoprotein E (Fragment) OS=Homo sapiens GN=APOE PE=4 SV=1
2	36.6	6	Q9HCC1	Q9HCC1_HUMAN	Single chain Fv (Fragment) OS=Homo sapiens PE=1 SV=1
0.41	24.1	6	P01608	KV116_HUMAN	Ig kappa chain V-I region Roy OS=Homo sapiens PE=1 SV=1
2	31.5	6	P01594	KV102_HUMAN	Ig kappa chain V-I region AU OS=Homo sapiens PE=1 SV=1
9.16	26.2	6	O43866	CD5L_HUMAN	CD5 antigen-like OS=Homo sapiens GN=CD5L PE=1 SV=1
10	6.2	5	B7Z5L4	B7Z5L4_HUMAN	cDNA FLJ61340, highly similar to Homo sapiens seizure related 6 homolog-like 2 (SEZ6L2), transcript variant 2, mRNA OS=Homo sapiens PE=2 SV=1
10	22.5	5	B7Z9J9	B7Z9J9_HUMAN	cDNA, FLJ78863, highly similar to Neurotrimin OS=Homo sapiens PE=2 SV=1
4	28.1	5	Q6FHM9	Q6FHM9_HUMAN	CD59 antigen, complement regulatory protein, isoform CRA_b OS=Homo sapiens GN=CD59 PE=2 SV=1
6.89	30.5	5	P16035	TIMP2_HUMAN	Metalloproteinase inhibitor 2 OS=Homo sapiens GN=TIMP2 PE=1 SV=2
9.87	22	5	Q8WVW5	Q8WVW5_HUMAN	Putative uncharacterized protein (Fragment) OS=Homo sapiens PE=2 SV=1
8.55	40.1	5	Q6FGX5	Q6FGX5_HUMAN	TIMP metallopeptidase inhibitor 1, isoform CRA_a OS=Homo sapiens GN=TIMP1 PE=2 SV=1
8.21	19.5	5	P22352	GPX3_HUMAN	Glutathione peroxidase 3 OS=Homo sapiens GN=GPX3 PE=1 SV=2
8.49	11	5	A8K144	A8K144_HUMAN	cDNA FLJ76746, highly similar to Homo sapiens brevican (BCAN), transcript variant 1, mRNA OS=Homo sapiens PE=2 SV=1
2.07	48.6	5	A2JA19	A2JA19_HUMAN	Anti-mucin1 light chain variable region (Fragment) OS=Homo sapiens PE=2 SV=1
8.46	14.9	5	B5MBX2	B5MBX2_HUMAN	Transcobalamin-2 OS=Homo sapiens GN=TCN2 PE=2 SV=1
6	7.8	5	P09603	CSF1_HUMAN	Macrophage colony-stimulating factor 1 OS=Homo sapiens GN=CSF1 PE=1 SV=2
2.04	26.1	5	P01767	HV306_HUMAN	Ig heavy chain V-III region BUT OS=Homo sapiens PE=1 SV=1
6.24	35.4	5	H0YN67	H0YN67_HUMAN	Immunoglobulin superfamily-containing leucine-rich repeat protein (Fragment) OS=Homo sapiens GN=ISLR PE=2 SV=1
9.7	12.8	5	P07357	CO8A_HUMAN	Complement component C8 alpha chain OS=Homo sapiens GN=C8A PE=1 SV=2
8	21.3	5	C9J8Z4	C9J8Z4_HUMAN	Immunoglobulin superfamily member 8 (Fragment) OS=Homo sapiens GN=IGSF8 PE=2 SV=1
8.42	4.4	5	J3QSX2	J3QSX2_HUMAN	Neurofascin OS=Homo sapiens GN=NFASC PE=4 SV=1
10.02	17.3	5	Q6FHG6	Q6FHG6_HUMAN	PRELP protein (Fragment) OS=Homo sapiens GN=PRELP PE=2 SV=1
0.11	23.4	5	A2J1N5	A2J1N5_HUMAN	Rheumatoid factor RF-ET6 (Fragment) OS=Homo sapiens PE=2 SV=1
10.04	23.1	5	P27169	PON1_HUMAN	Serum paraoxonase/arylesterase 1 OS=Homo sapiens GN=PON1 PE=1 SV=3
10.01	3.3	5	O00468-6	AGRIN_HUMAN	Isoform 6 of Agrin OS=Homo sapiens GN=AGRN
8.05	7.4	5	Q24JP5	T132A_HUMAN	Transmembrane protein 132A OS=Homo sapiens GN=TMEM132A PE=2 SV=1
3.56	1.3	5	Q59FG9	Q59FG9_HUMAN	Chondroitin sulfate proteoglycan 2 (Versican) variant (Fragment) OS=Homo sapiens PE=2 SV=1
10.12	27.6	5	D6RHI9	D6RHI9_HUMAN	Ribonuclease T2 (Fragment) OS=Homo sapiens GN=RNASET2 PE=2 SV=1
8.02	1.2	5	Q07954	LRP1_HUMAN	Prolow-density lipoprotein receptor-related protein 1 OS=Homo sapiens GN=LRP1 PE=1 SV=2
8.87	9.6	5	Q58F15	Q58F15_HUMAN	EPHA4 protein OS=Homo sapiens GN=EPHA4 PE=2 SV=1
7.47	4.8	5	G8JL96	G8JL96_HUMAN	Receptor-type tyrosine-protein phosphatase S OS=Homo sapiens GN=PTPRS PE=2 SV=1
10.01	4.5	5	Q7Z3Z9	Q7Z3Z9_HUMAN	L1 cell adhesion molecule (Fragment) OS=Homo sapiens GN=L1CAM PE=2 SV=1
6	36.8	5	P01625	KV402_HUMAN	Ig kappa chain V-IV region Len OS=Homo sapiens PE=1 SV=2
5.04	1.8	5	P22105	TENX_HUMAN	Tenascin-X OS=Homo sapiens GN=TNXB PE=1 SV=3
8.05	7.1	5	D3DTX7	D3DTX7_HUMAN	Collagen, type I, alpha 1, isoform CRA_a OS=Homo sapiens GN=COL1A1 PE=4 SV=1
8.04	6.6	5	F8WE90	F8WE90_HUMAN	Probable E3 ubiquitin-protein ligase MYCBP2 OS=Homo sapiens GN=PAM PE=2 SV=1
2.34	29.3	5	A2MYD0	A2MYD0_HUMAN	V1-17 protein (Fragment) OS=Homo sapiens GN=V1-17 PE=4 SV=1
10.27	12	5	B2R6M6	B2R6M6_HUMAN	cDNA, FLJ93024, highly similar to Homo sapiens EGF-containing fibulin-like extracellular matrix protein 1 (EFEMP1), transcript variant 1, mRNA OS=Homo sapiens PE=2 SV=1
5.89	8.5	4	B4E367	B4E367_HUMAN	cDNA FLJ61564, highly similar to Plexin domain-containing protein 2 OS=Homo sapiens PE=2 SV=1
6	11.3	4	Q8N126	CADM3_HUMAN	Cell adhesion molecule 3 OS=Homo sapiens GN=CADM3 PE=1 SV=1
8	28.7	4	P07360	CO8G_HUMAN	Complement component C8 gamma chain OS=Homo sapiens GN=C8G PE=1 SV=3
8	27.3	4	Q96S96	PEBP4_HUMAN	Phosphatidylethanolamine-binding protein 4 OS=Homo sapiens GN=PEBP4 PE=1 SV=3
4.57	10.9	4	Q53HB8	Q53HB8_HUMAN	Oligodendrocyte myelin glycoprotein variant (Fragment) OS=Homo sapiens PE=2 SV=1
4.45	6.7	4	B2R642	B2R642_HUMAN	cDNA, FLJ92775, highly similar to Homo sapiens melanoma cell adhesion molecule (MCAM), mRNA OS=Homo sapiens PE=2 SV=1
2	24.1	4	P01611	KV119_HUMAN	Ig kappa chain V-I region Wes OS=Homo sapiens PE=1 SV=1
8	6.5	4	Q6MZW2	FSTL4_HUMAN	Follistatin-related protein 4 OS=Homo sapiens GN=FSTL4 PE=2 SV=3
4	30.4	4	P01613	KV121_HUMAN	Ig kappa chain V-I region Ni OS=Homo sapiens PE=1 SV=1
2	16.7	4	P04430	KV122_HUMAN	Ig kappa chain V-I region BAN OS=Homo sapiens PE=1 SV=1
3.8	4.2	4	Q6EMK4	VASN_HUMAN	Vasorin OS=Homo sapiens GN=VASN PE=1 SV=1
7.96	16.2	4	B2R7N9	B2R7N9_HUMAN	cDNA, FLJ93532, highly similar to Homo sapiens osteomodulin (OMD), mRNA OS=Homo sapiens PE=2 SV=1
6.5	12.9	4	D6REX5	D6REX5_HUMAN	Selenoprotein P (Fragment) OS=Homo sapiens GN=SEPP1 PE=4 SV=1
4.54	11.6	4	P47972	NPTX2_HUMAN	Neuronal pentraxin-2 OS=Homo sapiens GN=NPTX2 PE=1 SV=2
5.2	17.1	4	P23435	CBLN1_HUMAN	Cerebellin-1 OS=Homo sapiens GN=CBLN1 PE=1 SV=1
6.64	16.7	4	D6RDX1	D6RDX1_HUMAN	Vesicular integral-membrane protein VIP36 (Fragment) OS=Homo sapiens GN=LMAN2 PE=2 SV=1
7.66	16.3	4	P22692	IBP4_HUMAN	Insulin-like growth factor-binding protein 4 OS=Homo sapiens GN=IGFBP4 PE=1 SV=2
5.31	17.1	4	Q5U077	Q5U077_HUMAN	L-lactate dehydrogenase OS=Homo sapiens GN=LDHB PE=2 SV=1
6.03	34.3	4	G4XXL9	G4XXL9_HUMAN	Cytochrome c OS=Homo sapiens GN=CYCS PE=2 SV=1
5.33	9.7	4	B7Z2R9	B7Z2R9_HUMAN	Lysosome-associated membrane glycoprotein 2 OS=Homo sapiens GN=LAMP2 PE=2 SV=1
2	6.9	4	P35908	K22E_HUMAN	Keratin, type II cytoskeletal 2 epidermal OS=Homo sapiens GN=KRT2 PE=1 SV=2
8	17.1	4	Q96FE7	P3IP1_HUMAN	Phosphoinositide-3-kinase-interacting protein 1 OS=Homo sapiens GN=PIK3IP1 PE=1 SV=2
6.12	17.6	4	Q8NG19	Q8NG19_HUMAN	Multi-functional protein MFP OS=Homo sapiens PE=2 SV=1
4.12	9.3	4	C9J6G4	C9J6G4_HUMAN	WAP, Kazal, immunoglobulin, Kunitz and NTR domain-containing protein 2 OS=Homo sapiens GN=WFIKKN2 PE=2 SV=1
7.7	4.7	4	Q4LE67	Q4LE67_HUMAN	CSPG3 variant protein (Fragment) OS=Homo sapiens GN=CSPG3 variant protein PE=2 SV=1
8.02	15.4	4	A8K335	A8K335_HUMAN	cDNA FLJ76254, highly similar to Homo sapiens gamma-glutamyl hydrolase (GGH), mRNA OS=Homo sapiens PE=2 SV=1
6.61	4.6	4	J3KNT4	J3KNT4_HUMAN	Fibroblast growth factor receptor OS=Homo sapiens GN=FGFR1 PE=3 SV=1
4.19	23.9	4	Q99969	RARR2_HUMAN	Retinoic acid receptor responder protein 2 OS=Homo sapiens GN=RARRES2 PE=1 SV=1
0.05	26.3	4	P01763	HV302_HUMAN	Ig heavy chain V-III region WEA OS=Homo sapiens PE=1 SV=1
6.54	2.8	4	O15031	PLXB2_HUMAN	Plexin-B2 OS=Homo sapiens GN=PLXNB2 PE=1 SV=3
6.01	3.4	4	Q8WX98	Q8WX98_HUMAN	Cell recognition protein CASPR4 OS=Homo sapiens GN=CASPR4 PE=2 SV=1
8	3.5	4	P23470	PTPRG_HUMAN	Receptor-type tyrosine-protein phosphatase gamma OS=Homo sapiens GN=PTPRG PE=1 SV=4
8	3.6	4	Q8IUX7	AEBP1_HUMAN	Adipocyte enhancer-binding protein 1 OS=Homo sapiens GN=AEBP1 PE=1 SV=1
8	7.6	4	Q96IA0	Q96IA0_HUMAN	PTPRN protein (Fragment) OS=Homo sapiens GN=PTPRN PE=2 SV=2
7.28	10.3	4	Q9BTY2	FUCO2_HUMAN	Plasma alpha-L-fucosidase OS=Homo sapiens GN=FUCA2 PE=1 SV=2
6.16	9	4	Q08AL8	Q08AL8_HUMAN	ADAM metallopeptidase domain 22 OS=Homo sapiens GN=ADAM22 PE=2 SV=1
8	44.3	4	J3QTR3	J3QTR3_HUMAN	Ubiquitin (Fragment) OS=Homo sapiens GN=RPS27A PE=1 SV=1
8.09	11.3	4	P48058-2	GRIA4_HUMAN	Isoform 2 of Glutamate receptor 4 OS=Homo sapiens GN=GRIA4
8.22	13	4	Q06828	FMOD_HUMAN	Fibromodulin OS=Homo sapiens GN=FMOD PE=1 SV=2
7.36	8.7	4	P11021	GRP78_HUMAN	78 kDa glucose-regulated protein OS=Homo sapiens GN=HSPA5 PE=1 SV=2
2.01	32.8	4	P01762	HV301_HUMAN	Ig heavy chain V-III region TRO OS=Homo sapiens PE=1 SV=1
5.6	28.5	4	D6RD17	D6RD17_HUMAN	Immunoglobulin J chain (Fragment) OS=Homo sapiens GN=IGJ PE=2 SV=1
2	25.2	4	P01780	HV319_HUMAN	Ig heavy chain V-III region JON OS=Homo sapiens PE=1 SV=1
6	3.9	4	Q92954	PRG4_HUMAN	Proteoglycan 4 OS=Homo sapiens GN=PRG4 PE=1 SV=2
2	11.7	4	B2R701	B2R701_HUMAN	cDNA, FLJ93202, Homo sapiens protease inhibitor 16 (PI16), mRNA OS=Homo sapiens PE=2 SV=1
6.58	57.5	4	Q96MH4	Q96MH4_HUMAN	cDNA FLJ32377 fis, clone SKMUS1000014, highly similar to Polyubiquitin 9 OS=Homo sapiens PE=2 SV=1
4.41	32.7	4	A2NB45	A2NB45_HUMAN	Cold agglutinin FS-1 L-chain (Fragment) OS=Homo sapiens PE=2 SV=1
5.68	24.8	3	J3KQI0	J3KQI0_HUMAN	Lymphocyte antigen 6H OS=Homo sapiens GN=LY6H PE=4 SV=1
6	6.9	3	P33908	MA1A1_HUMAN	Mannosyl-oligosaccharide 1,2-alpha-mannosidase IA OS=Homo sapiens GN=MAN1A1 PE=1 SV=3
5	10.4	3	B4DTZ8	B4DTZ8_HUMAN	cDNA FLJ52277, highly similar to Follistatin-related protein 1 OS=Homo sapiens PE=2 SV=1
6	12.9	3	H0YDW7	H0YDW7_HUMAN	CD44 antigen (Fragment) OS=Homo sapiens GN=CD44 PE=2 SV=1
4.21	37.6	3	B0YIW2	B0YIW2_HUMAN	Apolipoprotein C-III OS=Homo sapiens GN=APOC3 PE=2 SV=1
4.01	26.7	3	A8K6C9	A8K6C9_HUMAN	cDNA FLJ78037, highly similar to Homo sapiens insulin-like growth factor 2 (somatomedin A), mRNA OS=Homo sapiens PE=2 SV=1
3.42	9.6	3	F8W8J5	F8W8J5_HUMAN	V-set and transmembrane domain-containing protein 2A OS=Homo sapiens GN=VSTM2A PE=2 SV=1
3.33	11	3	Q99574	NEUS_HUMAN	Neuroserpin OS=Homo sapiens GN=SERPINI1 PE=1 SV=1
3.57	36.1	3	Q9UL83	Q9UL83_HUMAN	Myosin-reactive immunoglobulin light chain variable region (Fragment) OS=Homo sapiens PE=1 SV=1
2.18	11.7	3	J3KPS3	J3KPS3_HUMAN	Fructose-bisphosphate aldolase OS=Homo sapiens GN=ALDOA PE=3 SV=1
6.14	16.5	3	A0A4Z1	A0A4Z1_HUMAN	CADM1 protein OS=Homo sapiens GN=CADM1 PE=2 SV=1
2.66	39.7	3	Q96JD0	Q96JD0_HUMAN	Amyloid lambda 6 light chain variable region SAR (Fragment) OS=Homo sapiens PE=1 SV=1
5.24	9.2	3	Q6FHV6	Q6FHV6_HUMAN	ENO2 protein OS=Homo sapiens GN=ENO2 PE=2 SV=1
2.34	12.1	3	Q96IY4	CBPB2_HUMAN	Carboxypeptidase B2 OS=Homo sapiens GN=CPB2 PE=1 SV=2
4.02	6.9	3	H0YAC1	H0YAC1_HUMAN	Plasma kallikrein heavy chain (Fragment) OS=Homo sapiens GN=KLKB1 PE=3 SV=1
4.97	10.3	3	Q9BVJ8	Q9BVJ8_HUMAN	HEXA protein (Fragment) OS=Homo sapiens GN=HEXA PE=2 SV=2
2	17.1	3	P06331	HV209_HUMAN	Ig heavy chain V-II region ARH-77 OS=Homo sapiens PE=4 SV=1
5.17	14.4	3	P23284	PPIB_HUMAN	Peptidyl-prolyl cis-trans isomerase B OS=Homo sapiens GN=PPIB PE=1 SV=2
3.68	9	3	P02747	C1QC_HUMAN	Complement C1q subcomponent subunit C OS=Homo sapiens GN=C1QC PE=1 SV=3
5.52	8.5	3	B2RBG3	B2RBG3_HUMAN	cDNA, FLJ95493, highly similar to Homo sapiens fucosidase, alpha-L- 1, tissue (FUCA1), mRNA OS=Homo sapiens PE=2 SV=1
2	23.9	3	A2IPI6	A2IPI6_HUMAN	HRV Fab 027-VL (Fragment) OS=Homo sapiens PE=2 SV=1
6.09	9	3	G3V0F0	G3V0F0_HUMAN	Putative uncharacterized protein MGC45438 OS=Homo sapiens GN=C16orf89 PE=2 SV=1
6	14.6	3	P00918	CAH2_HUMAN	Carbonic anhydrase 2 OS=Homo sapiens GN=CA2 PE=1 SV=2
3.13	4.2	3	Q17RA0	Q17RA0_HUMAN	Interleukin 6 signal transducer (Gp130, oncostatin M receptor) OS=Homo sapiens GN=IL6ST PE=2 SV=1
5.82	3.2	3	P14543	NID1_HUMAN	Nidogen-1 OS=Homo sapiens GN=NID1 PE=1 SV=3
5.3	6.3	3	E7END6	E7END6_HUMAN	Vitamin K-dependent protein C heavy chain OS=Homo sapiens GN=PROC PE=2 SV=1
2.72	32.2	3	A0N5G3	A0N5G3_HUMAN	Rheumatoid factor G9 light chain (Fragment) OS=Homo sapiens GN=V<lambda>3 PE=2 SV=1
3.46	29.2	3	B2R5G8	B2R5G8_HUMAN	Serum amyloid A protein OS=Homo sapiens PE=2 SV=1
4.07	7.6	3	Q9Y646	CBPQ_HUMAN	Carboxypeptidase Q OS=Homo sapiens GN=CPQ PE=1 SV=1
3.47	6	3	Q9Y4I9	Q9Y4I9_HUMAN	Tyrosine phosphatase IA-2beta OS=Homo sapiens PE=2 SV=1
5.39	7.1	3	Q8NE26	Q8NE26_HUMAN	ADAM metallopeptidase with thrombospondin type 1 motif, 1 OS=Homo sapiens GN=ADAMTS1 PE=2 SV=1
2.53	2.9	3	O94910	LPHN1_HUMAN	Latrophilin-1 OS=Homo sapiens GN=LPHN1 PE=1 SV=1
3.86	6.7	3	M0R0W6	M0R0W6_HUMAN	Tyrosine-protein kinase receptor UFO OS=Homo sapiens GN=AXL PE=3 SV=1
4	2.5	3	B2RCH4	B2RCH4_HUMAN	cDNA, FLJ96073, highly similar to Homo sapiens contactin associated protein-like 2 (CNTNAP2), mRNA OS=Homo sapiens PE=2 SV=1
6.01	13.3	3	B7Z7Q6	B7Z7Q6_HUMAN	Lysosomal Pro-X carboxypeptidase OS=Homo sapiens GN=PRCP PE=2 SV=1
4.64	12.4	3	A8K2H4	A8K2H4_HUMAN	cDNA FLJ78235 OS=Homo sapiens PE=2 SV=1
3.45	15.8	3	Q9NX12	Q9NX12_HUMAN	cDNA FLJ20496 fis, clone KAT08729 OS=Homo sapiens PE=2 SV=1
2.01	7.9	3	A2NB44	A2NB44_HUMAN	Cold agglutinin FS-2 H-chain (Fragment) OS=Homo sapiens GN=IGH@ PE=2 SV=1
2.25	4.1	3	Q8IYG5	Q8IYG5_HUMAN	MOG protein OS=Homo sapiens GN=MOG PE=2 SV=1
2.64	4	3	O95428	PPN_HUMAN	Papilin OS=Homo sapiens GN=PAPLN PE=2 SV=4
4.3	1.8	3	Q92673	SORL_HUMAN	Sortilin-related receptor OS=Homo sapiens GN=SORL1 PE=1 SV=2
6	32.7	3	P01617	KV204_HUMAN	Ig kappa chain V-II region TEW OS=Homo sapiens PE=1 SV=1
6	5.4	3	E7EQ48	E7EQ48_HUMAN	Proteoglycan 4 OS=Homo sapiens GN=PRG4 PE=2 SV=1
0.22	0.6	3	Q13315	ATM_HUMAN	Serine-protein kinase ATM OS=Homo sapiens GN=ATM PE=1 SV=3
6	13.6	3	Q96RZ2	Q96RZ2_HUMAN	N-acetylglucosamine-1-phosphate transferase, gamma subunit, isoform CRA_b OS=Homo sapiens GN=RJD9 PE=2 SV=1
4.68	11.5	3	P00338	LDHA_HUMAN	L-lactate dehydrogenase A chain OS=Homo sapiens GN=LDHA PE=1 SV=2
1.27	11.1	3	Q7LDD5	Q7LDD5_HUMAN	Calcium/calmodulin-dependent protein kinase (CaM kinase) II alpha, isoform CRA_a OS=Homo sapiens GN=CAMK2A PE=2 SV=1
5.04	10.9	3	Q59FD0	Q59FD0_HUMAN	Huntingtin interacting protein-1-related (Fragment) OS=Homo sapiens PE=2 SV=1
2	12.6	3	Q8NHM4	TRY6_HUMAN	Putative trypsin-6 OS=Homo sapiens GN=TRY6 PE=5 SV=1
5.3	29.5	3	B4DM82	B4DM82_HUMAN	cDNA FLJ53060, moderately similar to Peptidyl-prolyl cis-trans isomerase A (EC 5.2.1.8) OS=Homo sapiens PE=2 SV=1
5.65	5.7	3	B4E1N8	B4E1N8_HUMAN	cDNA FLJ51183, highly similar to Extracellular matrix protein 2 OS=Homo sapiens PE=2 SV=1
4	23.6	3	B6EDE2	B6EDE2_HUMAN	Epididymis luminal protein 180 (Fragment) OS=Homo sapiens GN=HEL180 PE=2 SV=1
4.7	10	3	B7Z3K9	B7Z3K9_HUMAN	Fructose-bisphosphate aldolase OS=Homo sapiens PE=2 SV=1
5.37	10.5	3	H3BTN5	H3BTN5_HUMAN	Pyruvate kinase (Fragment) OS=Homo sapiens GN=PKM PE=2 SV=1
6	4.5	3	H0YNG5	H0YNG5_HUMAN	Alpha-mannosidase 2x OS=Homo sapiens GN=MAN2A2 PE=2 SV=1
2.34	30.9	3	A2NXP8	A2NXP8_HUMAN	Heavy chain variable region (Fragment) OS=Homo sapiens PE=2 SV=1
5.66	13.6	3	A2VDK1	A2VDK1_HUMAN	LRRC4B protein (Fragment) OS=Homo sapiens GN=LRRC4B PE=2 SV=1
2	17	3	A2NYV4	A2NYV4_HUMAN	Light chain Fab (Fragment) OS=Homo sapiens PE=2 SV=1
4	5	3	A8K6K8	A8K6K8_HUMAN	cDNA FLJ77325 OS=Homo sapiens PE=2 SV=1
1.3	4.4	3	B1AP59	B1AP59_HUMAN	Carboxypeptidase N, polypeptide 1, 50kD OS=Homo sapiens GN=CPN1 PE=2 SV=1
5.89	3.2	3	Q59H90	Q59H90_HUMAN	Protein tyrosine phosphatase, receptor type, D isoform 4 variant (Fragment) OS=Homo sapiens PE=2 SV=1
1.78	6.6	3	G3V5Q9	G3V5Q9_HUMAN	Plasma serine protease inhibitor (Fragment) OS=Homo sapiens GN=SERPINA5 PE=2 SV=1
4.66	6.5	3	F5H7G1	F5H7G1_HUMAN	Complement component C8 beta chain OS=Homo sapiens GN=C8B PE=2 SV=1
0.8	18	3	Q0ZCI2	Q0ZCI2_HUMAN	Immunglobulin heavy chain variable region (Fragment) OS=Homo sapiens PE=4 SV=1
0.94	19.2	3	Q5NV84	Q5NV84_HUMAN	V1-3 protein (Fragment) OS=Homo sapiens GN=IGLV2-11 PE=4 SV=1
4	26	2	K7ERI9	K7ERI9_HUMAN	Truncated apolipoprotein C-I (Fragment) OS=Homo sapiens GN=APOC1 PE=4 SV=1
2	11.8	2	K7ER74	K7ER74_HUMAN	Apolipoprotein C-II OS=Homo sapiens GN=APOC2 PE=4 SV=1
4	8.7	2	Q6B0I4	Q6B0I4_HUMAN	Opioid binding protein/cell adhesion molecule-like OS=Homo sapiens GN=OPCML PE=2 SV=1
4	2.6	2	G3XAE6	G3XAE6_HUMAN	Extracellular sulfatase Sulf-2 OS=Homo sapiens GN=SULF2 PE=2 SV=1
3.08	8.9	2	K7ES70	K7ES70_HUMAN	Microfibril-associated glycoprotein 4 OS=Homo sapiens GN=MFAP4 PE=4 SV=1
2	16.8	2	Q0ZCH6	Q0ZCH6_HUMAN	Immunglobulin heavy chain variable region (Fragment) OS=Homo sapiens PE=4 SV=1
3.85	23.3	2	Q16568	CART_HUMAN	Cocaine- and amphetamine-regulated transcript protein OS=Homo sapiens GN=CARTPT PE=1 SV=1
4	7.6	2	B7ZLI0	B7ZLI0_HUMAN	Reticulon 4 receptor-like 2 OS=Homo sapiens GN=RTN4RL2 PE=2 SV=1
1.18	23.3	2	P04434	KV310_HUMAN	Ig kappa chain V-III region VH (Fragment) OS=Homo sapiens PE=4 SV=1
4.01	6.5	2	Q8TCF0	Q8TCF0_HUMAN	LBP protein OS=Homo sapiens GN=LBP PE=2 SV=1
2.42	0.6	2	Q9NYQ8	FAT2_HUMAN	Protocadherin Fat 2 OS=Homo sapiens GN=FAT2 PE=1 SV=2
4	9.5	2	A6NLU5	VTM2B_HUMAN	V-set and transmembrane domain-containing protein 2B OS=Homo sapiens GN=VSTM2B PE=2 SV=2
4.11	18.7	2	Q6IB39	Q6IB39_HUMAN	RNASE6 protein OS=Homo sapiens GN=RNASE6 PE=2 SV=1
4	3.9	2	P22792	CPN2_HUMAN	Carboxypeptidase N subunit 2 OS=Homo sapiens GN=CPN2 PE=1 SV=3
2	28.2	2	Q562M3	Q562M3_HUMAN	Actin-like protein (Fragment) OS=Homo sapiens GN=ACT PE=3 SV=1
4	4.1	2	Q59HE0	Q59HE0_HUMAN	Colony stimulating factor 1 receptor variant (Fragment) OS=Homo sapiens PE=2 SV=1
0.5	7	2	P01824	HV206_HUMAN	Ig heavy chain V-II region WAH OS=Homo sapiens PE=1 SV=1
4	12.3	2	Q99674	CGRE1_HUMAN	Cell growth regulator with EF hand domain protein 1 OS=Homo sapiens GN=CGREF1 PE=2 SV=2
4	9.1	2	H0Y3T6	H0Y3T6_HUMAN	45 kDa calcium-binding protein (Fragment) OS=Homo sapiens GN=SDF4 PE=4 SV=1
2.95	3.8	2	Q03167	TGBR3_HUMAN	Transforming growth factor beta receptor type 3 OS=Homo sapiens GN=TGFBR3 PE=1 SV=3
4	1.6	2	Q2M1J3	Q2M1J3_HUMAN	ROBO1 protein OS=Homo sapiens GN=ROBO1 PE=2 SV=1
3.77	5.6	2	B2R672	B2R672_HUMAN	Extracellular link domain containing 1 OS=Homo sapiens GN=XLKD1 PE=2 SV=1
2.06	2.9	2	B7Z9U4	B7Z9U4_HUMAN	cDNA, FLJ78958, highly similar to Calsyntenin-3 OS=Homo sapiens PE=2 SV=1
1.46	4.6	2	Q86TV4	Q86TV4_HUMAN	Full-length cDNA clone CS0DI085YI08 of Placenta of Homo sapiens (human) (Fragment) OS=Homo sapiens PE=2 SV=1
0.9	8.1	2	B1AKG0	B1AKG0_HUMAN	Complement factor H-related protein 1 OS=Homo sapiens GN=CFHR1 PE=2 SV=1
3.07	4.2	2	J3KP07	J3KP07_HUMAN	Growth arrest-specific protein 6 OS=Homo sapiens GN=GAS6 PE=4 SV=1
3.46	8.1	2	B3KXJ2	B3KXJ2_HUMAN	cDNA FLJ45536 fis, clone BRTHA2031917, highly similar to Ciliary neurotrophic factor receptor alpha OS=Homo sapiens PE=2 SV=1
2.23	4.7	2	Q06033	ITIH3_HUMAN	Inter-alpha-trypsin inhibitor heavy chain H3 OS=Homo sapiens GN=ITIH3 PE=1 SV=2
3.8	6.5	2	Q2KHQ6	Q2KHQ6_HUMAN	APOL1 protein OS=Homo sapiens GN=APOL1 PE=2 SV=2
3.39	4.4	2	Q5VVQ8	Q5VVQ8_HUMAN	Complement component 4 binding protein, alpha, isoform CRA_c OS=Homo sapiens GN=C4BPA PE=2 SV=1
2	3.2	2	P08174-5	DAF_HUMAN	Isoform 5 of Complement decay-accelerating factor OS=Homo sapiens GN=CD55
4	22.9	2	P80723	BASP1_HUMAN	Brain acid soluble protein 1 OS=Homo sapiens GN=BASP1 PE=1 SV=2
1.8	4.9	2	Q9H606	CY017_HUMAN	Putative uncharacterized protein CYorf17 OS=Homo sapiens GN=CYorf17 PE=2 SV=1
1.92	9.4	2	A2N011	A2N011_HUMAN	Vh1-D-J3-region (Fragment) OS=Homo sapiens PE=2 SV=1
2.7	8.3	2	B4DGD7	B4DGD7_HUMAN	cDNA FLJ53595, highly similar to Iduronate 2-sulfatase (EC 3.1.6.13) OS=Homo sapiens PE=2 SV=1
4	19.3	2	Q8WWX9	SELM_HUMAN	Selenoprotein M OS=Homo sapiens GN=SELM PE=1 SV=3
4.11	7.5	2	Q9Y2T3	GUAD_HUMAN	Guanine deaminase OS=Homo sapiens GN=GDA PE=1 SV=1
4.01	5.2	2	K7ELL7	K7ELL7_HUMAN	Glucosidase 2 subunit beta OS=Homo sapiens GN=PRKCSH PE=4 SV=1
3.6	40.2	2	P04271	S100B_HUMAN	Protein S100-B OS=Homo sapiens GN=S100B PE=1 SV=2
2	4.3	2	Q9NZP8	C1RL_HUMAN	Complement C1r subcomponent-like protein OS=Homo sapiens GN=C1RL PE=1 SV=2
4	7.4	2	F8VWW8	F8VWW8_HUMAN	Acid sphingomyelinase-like phosphodiesterase 3b OS=Homo sapiens GN=SMPDL3B PE=2 SV=1
2	5.1	2	P24593	IBP5_HUMAN	Insulin-like growth factor-binding protein 5 OS=Homo sapiens GN=IGFBP5 PE=1 SV=1
2.38	2.3	2	F5GZZ9	F5GZZ9_HUMAN	Scavenger receptor cysteine-rich type 1 protein M130 OS=Homo sapiens GN=CD163 PE=2 SV=1
4.12	6.1	2	B3KW79	B3KW79_HUMAN	cDNA FLJ42481 fis, clone BRACE2032090, highly similar to Probable serine carboxypeptidase CPVL (EC 3.4.16.-) OS=Homo sapiens PE=2 SV=1
2	3	2	Q53GE4	Q53GE4_HUMAN	REVERSED Leucine rich repeat containing 19 variant (Fragment) OS=Homo sapiens PE=2 SV=1
2.04	10.3	2	Q8TCZ2	C99L2_HUMAN	CD99 antigen-like protein 2 OS=Homo sapiens GN=CD99L2 PE=1 SV=1
4	9.3	2	P52799	EFNB2_HUMAN	Ephrin-B2 OS=Homo sapiens GN=EFNB2 PE=1 SV=1
0.17	13.5	2	B2R4C5	B2R4C5_HUMAN	Lysozyme OS=Homo sapiens GN=LYZ PE=2 SV=1
4.09	6.2	2	B4DWK8	B4DWK8_HUMAN	Catalase OS=Homo sapiens PE=2 SV=1
4	16.2	2	P07108-5	ACBP_HUMAN	Isoform 5 of Acyl-CoA-binding protein OS=Homo sapiens GN=DBI
2.02	2.4	2	Q5VU97	CAHD1_HUMAN	VWFA and cache domain-containing protein 1 OS=Homo sapiens GN=CACHD1 PE=2 SV=2
2	0.3	2	D6RGG3	D6RGG3_HUMAN	Collagen alpha-1(XII) chain OS=Homo sapiens GN=COL12A1 PE=2 SV=1
0.13	2.8	2	Q504Y0	S39AC_HUMAN	Zinc transporter ZIP12 OS=Homo sapiens GN=SLC39A12 PE=2 SV=3
2.41	5.7	2	Q12787	Q12787_HUMAN	Receptor tyrosine kinase (Fragment) OS=Homo sapiens PE=2 SV=1
2.39	12.2	2	Q9HAU6	FKSG2_HUMAN	Putative apoptosis inhibitor FKSG2 OS=Homo sapiens GN=FKSG2 PE=5 SV=2
2.51	4.8	2	Q9UBX1	CATF_HUMAN	Cathepsin F OS=Homo sapiens GN=CTSF PE=1 SV=1
2.39	5.8	2	Q6ZMV9-4	KIF6_HUMAN	REVERSED Isoform 4 of Kinesin-like protein KIF6 OS=Homo sapiens GN=KIF6
4.02	4.6	2	Q6ZRP7	QSOX2_HUMAN	Sulfhydryl oxidase 2 OS=Homo sapiens GN=QSOX2 PE=1 SV=3
4	6	2	Q9BQ16	TICN3_HUMAN	Testican-3 OS=Homo sapiens GN=SPOCK3 PE=1 SV=2
3.37	4.5	2	Q9NX62	IMPA3_HUMAN	Inositol monophosphatase 3 OS=Homo sapiens GN=IMPAD1 PE=1 SV=1
2	2.5	2	Q59F71	Q59F71_HUMAN	Bone morphogenetic protein 1 isoform 1, variant (Fragment) OS=Homo sapiens PE=2 SV=1
2.72	6.9	2	Q16769	QPCT_HUMAN	Glutaminyl-peptide cyclotransferase OS=Homo sapiens GN=QPCT PE=1 SV=1
3.89	21.8	2	O95445	APOM_HUMAN	Apolipoprotein M OS=Homo sapiens GN=APOM PE=1 SV=2
3.06	27.8	2	Q96SB0	Q96SB0_HUMAN	Anti-streptococcal/anti-myosin immunoglobulin lambda light chain variable region (Fragment) OS=Homo sapiens PE=2 SV=1
4	7.5	2	P40925	MDHC_HUMAN	Malate dehydrogenase, cytoplasmic OS=Homo sapiens GN=MDH1 PE=1 SV=4
2	2.2	2	Q5HYL4	Q5HYL4_HUMAN	Putative uncharacterized protein DKFZp686E1893 OS=Homo sapiens GN=DKFZp686E1893 PE=2 SV=1
2	10.8	2	E9PJ29	E9PJ29_HUMAN	Out at first protein homolog OS=Homo sapiens GN=OAF PE=2 SV=1
1.75	2.7	2	F5GWR7	F5GWR7_HUMAN	Receptor-type tyrosine-protein phosphatase delta OS=Homo sapiens GN=PTPRD PE=2 SV=1
2	2.7	2	Q7Z3T9	Q7Z3T9_HUMAN	Putative uncharacterized protein DKFZp686J1169 OS=Homo sapiens GN=DKFZp686J1169 PE=2 SV=1
0.55	2	2	C9JVC9	C9JVC9_HUMAN	Voltage-dependent calcium channel subunit alpha-2/delta-2 OS=Homo sapiens GN=CACNA2D2 PE=2 SV=1
3.86	1.7	2	O75882	ATRN_HUMAN	Attractin OS=Homo sapiens GN=ATRN PE=1 SV=2
2	1.4	2	B4DYV8	B4DYV8_HUMAN	Roundabout homolog 4 OS=Homo sapiens GN=ROBO4 PE=2 SV=1
4	8.3	2	B4E1J3	B4E1J3_HUMAN	cDNA FLJ53615, highly similar to Fibromodulin OS=Homo sapiens PE=2 SV=1
2.02	0.1	2	D3DPG0	D3DPG0_HUMAN	Titin, isoform CRA_a OS=Homo sapiens GN=TTN PE=4 SV=1
2	13.4	2	A2NW97	A2NW97_HUMAN	Rheumatoid factor Vh I region (Fragment) OS=Homo sapiens PE=2 SV=1
3	2.7	2	B4DZ36	B4DZ36_HUMAN	cDNA FLJ58441, highly similar to Attractin OS=Homo sapiens PE=2 SV=1
1.39	1.1	2	Q5SYB0	FRPD1_HUMAN	FERM and PDZ domain-containing protein 1 OS=Homo sapiens GN=FRMPD1 PE=1 SV=1
3.59	10.9	2	Q5SRP5	Q5SRP5_HUMAN	Apolipoprotein M OS=Homo sapiens GN=APOM PE=2 SV=1
2.22	3.4	2	Q59GL7	Q59GL7_HUMAN	Glutamate receptor, ionotrophic variant (Fragment) OS=Homo sapiens PE=4 SV=1
0.96	24.5	2	F5H6W8	F5H6W8_HUMAN	L-lactate dehydrogenase A chain OS=Homo sapiens GN=LDHA PE=2 SV=1
2	0.5	2	Q9C0G6	DYH6_HUMAN	Dynein heavy chain 6, axonemal OS=Homo sapiens GN=DNAH6 PE=1 SV=3
1.46	5.2	2	Q1HP67	Q1HP67_HUMAN	Lipoprotein, Lp(A) OS=Homo sapiens GN=LPA PE=3 SV=1
2.45	4.7	2	Q86SE4	Q86SE4_HUMAN	L1 cell adhesion molecule (Fragment) OS=Homo sapiens GN=L1CAM PE=2 SV=1
0.1	6.2	2	A2NV54	A2NV54_HUMAN	Precursor (AA -19 to 108) (Fragment) OS=Homo sapiens PE=2 SV=1
2	0.1	2	B5ME49	B5ME49_HUMAN	Mucin-16 OS=Homo sapiens GN=MUC16 PE=2 SV=2
2	27.3	2	Q5NV63	Q5NV63_HUMAN	V1-4 protein (Fragment) OS=Homo sapiens GN=V1-4 PE=4 SV=1
1.82	9.2	2	P01773	HV312_HUMAN	Ig heavy chain V-III region BUR OS=Homo sapiens PE=1 SV=1
4	4.2	2	Q96N46	TTC14_HUMAN	Tetratricopeptide repeat protein 14 OS=Homo sapiens GN=TTC14 PE=1 SV=1
4	4.1	2	P05160	F13B_HUMAN	Coagulation factor XIII B chain OS=Homo sapiens GN=F13B PE=1 SV=3
4	3.2	2	Q9ULB4	CADH9_HUMAN	Cadherin-9 OS=Homo sapiens GN=CDH9 PE=2 SV=2
4	10	2	Q5T0Y8	Q5T0Y8_HUMAN	Acid sphingomyelinase-like phosphodiesterase 3b (Fragment) OS=Homo sapiens GN=SMPDL3B PE=2 SV=1
0.56	25	2	P01778	HV317_HUMAN	Ig heavy chain V-III region ZAP OS=Homo sapiens PE=1 SV=1
4	11.9	2	C9JLV0	C9JLV0_HUMAN	Probable serine carboxypeptidase CPVL (Fragment) OS=Homo sapiens GN=CPVL PE=2 SV=1
2.14	1.8	2	B7ZLX5	B7ZLX5_HUMAN	PTPRG protein OS=Homo sapiens GN=PTPRG PE=2 SV=1
0.09	4.4	2	B3KY43	B3KY43_HUMAN	cDNA FLJ46798 fis, clone TRACH3031660, highly similar to cAMP-dependent protein kinase type II-beta regulatory subunit OS=Homo sapiens PE=2 SV=1
4	3.2	2	A8K604	A8K604_HUMAN	cDNA FLJ77469, highly similar to Homo sapiens protein tyrosine phosphatase, receptor type, N, mRNA OS=Homo sapiens PE=2 SV=1
2.01	5.3	2	Q56UX9	Q56UX9_HUMAN	MOG beta-3 (Fragment) OS=Homo sapiens PE=2 SV=1
3.44	13.8	2	Q6UY50	Q6UY50_HUMAN	NL3 OS=Homo sapiens GN=UNQ172 PE=2 SV=1
2	1.7	1	Q9BTE3	MCMBP_HUMAN	Mini-chromosome maintenance complex-binding protein OS=Homo sapiens GN=MCMBP PE=1 SV=2
0.97	4.1	1	P02745	C1QA_HUMAN	Complement C1q subcomponent subunit A OS=Homo sapiens GN=C1QA PE=1 SV=2
2	2.1	1	Q9NWK9	BCD1_HUMAN	Box C/D snoRNA protein 1 OS=Homo sapiens GN=ZNHIT6 PE=1 SV=1
2	5.8	1	Q8N8F1	Q8N8F1_HUMAN	Exostoses (Multiple)-like 2, isoform CRA_b OS=Homo sapiens GN=EXTL2 PE=2 SV=1
2	3	1	Q6FHC9	Q6FHC9_HUMAN	STC2 protein (Fragment) OS=Homo sapiens GN=STC2 PE=2 SV=1
2	2.1	1	Q14520	HABP2_HUMAN	Hyaluronan-binding protein 2 OS=Homo sapiens GN=HABP2 PE=1 SV=1
2	2.1	1	B4DWF9	B4DWF9_HUMAN	cDNA FLJ60358, highly similar to Regulator of G-protein signaling 3 OS=Homo sapiens PE=2 SV=1
0.54	10.8	1	C9J0J0	C9J0J0_HUMAN	Coiled-coil domain-containing protein 126 (Fragment) OS=Homo sapiens GN=CCDC126 PE=2 SV=1
0.24	3.7	1	Q53G71	Q53G71_HUMAN	Calreticulin variant (Fragment) OS=Homo sapiens PE=2 SV=1
1.42	14.8	1	K7EQU5	K7EQU5_HUMAN	Poliovirus receptor (Fragment) OS=Homo sapiens GN=PVR PE=4 SV=1
1.73	4.5	1	P02743	SAMP_HUMAN	Serum amyloid P-component OS=Homo sapiens GN=APCS PE=1 SV=2
2	1.4	1	Q8TAM9	Q8TAM9_HUMAN	Intercellular adhesion molecule 5, telencephalin OS=Homo sapiens GN=ICAM5 PE=2 SV=1
2	4.8	1	P04438	HV208_HUMAN	Ig heavy chain V-II region SESS OS=Homo sapiens PE=2 SV=1
2	4	1	J3KNF6	J3KNF6_HUMAN	RGM domain family member B OS=Homo sapiens GN=RGMB PE=4 SV=1
2	4.3	1	Q8NCE1	Q8NCE1_HUMAN	cDNA FLJ90312 fis, clone NT2RP2001276, moderately similar to NPDC-1 PROTEIN OS=Homo sapiens PE=2 SV=1
2.02	2.4	1	Q5CAQ5	Q5CAQ5_HUMAN	Tumor rejection antigen (Gp96) 1 OS=Homo sapiens GN=TRA1 PE=2 SV=1
0.59	2.3	1	Q9NY97	B3GN2_HUMAN	UDP-GlcNAc:betaGal beta-1,3-N-acetylglucosaminyltransferase 2 OS=Homo sapiens GN=B3GNT2 PE=1 SV=2
2	2.3	1	Q9NZ53	PDXL2_HUMAN	Podocalyxin-like protein 2 OS=Homo sapiens GN=PODXL2 PE=1 SV=1
0.75	2.1	1	Q53GN8	Q53GN8_HUMAN	Macrophage stimulating 1 (Hepatocyte growth factor-like) variant (Fragment) OS=Homo sapiens PE=2 SV=1
2	3.8	1	Q6FHI7	Q6FHI7_HUMAN	CA4 protein OS=Homo sapiens GN=CA4 PE=2 SV=1
2	1.7	1	Q9ULF5	S39AA_HUMAN	Zinc transporter ZIP10 OS=Homo sapiens GN=SLC39A10 PE=1 SV=2
2	16	1	R4GMW4	R4GMW4_HUMAN	Splicing factor, arginine/serine-rich 19 (Fragment) OS=Homo sapiens GN=SRA1 PE=4 SV=1
2.04	3.9	1	Q6IBC3	Q6IBC3_HUMAN	CTSH protein OS=Homo sapiens GN=CTSH PE=2 SV=1
1.8	6.5	1	P21246	PTN_HUMAN	Pleiotrophin OS=Homo sapiens GN=PTN PE=1 SV=1
2.03	2	1	Q86Y38	XYLT1_HUMAN	Xylosyltransferase 1 OS=Homo sapiens GN=XYLT1 PE=1 SV=1
1.6	4.5	1	H0YCY8	H0YCY8_HUMAN	Dipeptidyl peptidase 1 exclusion domain chain (Fragment) OS=Homo sapiens GN=CTSC PE=4 SV=1
0.1	0.4	1	Q6IE36	OVOS2_HUMAN	REVERSED Ovostatin homolog 2 OS=Homo sapiens GN=OVOS2 PE=2 SV=2
2	8.2	1	J3QS03	J3QS03_HUMAN	Twisted gastrulation protein homolog 1 OS=Homo sapiens GN=TWSG1 PE=4 SV=1
2	2.5	1	Q5J875	Q5J875_HUMAN	GUGU gamma form OS=Homo sapiens GN=GUGU PE=2 SV=1
2	12.1	1	Q6NVI1	Q6NVI1_HUMAN	MARCKS protein (Fragment) OS=Homo sapiens GN=MARCKS PE=2 SV=1
2.01	2.1	1	K4DIA0	K4DIA0_HUMAN	ICOS ligand OS=Homo sapiens GN=ICOSLG PE=4 SV=1
2	9.3	1	P10153	RNAS2_HUMAN	Non-secretory ribonuclease OS=Homo sapiens GN=RNASE2 PE=1 SV=2
2	8.8	1	Q53XB4	Q53XB4_HUMAN	Full-length cDNA clone CS0DF032YM23 of Fetal brain of Homo sapiens (human) OS=Homo sapiens GN=hCG_2044782 PE=2 SV=1
2	1.9	1	H0YDE5	H0YDE5_HUMAN	UPF0606 protein KIAA1549L (Fragment) OS=Homo sapiens GN=KIAA1549L PE=4 SV=1
2	13.4	1	A4D158	A4D158_HUMAN	Neuropeptide Y OS=Homo sapiens GN=NPY PE=2 SV=1
2	6	1	Q9NYX4	CALY_HUMAN	Neuron-specific vesicular protein calcyon OS=Homo sapiens GN=CALY PE=1 SV=1
0.14	9.2	1	Q5NV83	Q5NV83_HUMAN	V3-3 protein (Fragment) OS=Homo sapiens GN=IGLV7-46 PE=4 SV=1
1.47	2	1	P29120	NEC1_HUMAN	Neuroendocrine convertase 1 OS=Homo sapiens GN=PCSK1 PE=1 SV=2
1.8	9.7	1	Q5U058	Q5U058_HUMAN	Growth associated protein 43 OS=Homo sapiens GN=GAP43 PE=2 SV=1
0.1	9.7	1	A0N7J6	A0N7J6_HUMAN	REV25-2 (Fragment) OS=Homo sapiens PE=2 SV=1
2	3.3	1	Q2TSD0	Q2TSD0_HUMAN	Glyceraldehyde-3-phosphate dehydrogenase OS=Homo sapiens PE=2 SV=1
2	12.6	1	C7DJS2	C7DJS2_HUMAN	Glutathione S-transferase pi (Fragment) OS=Homo sapiens GN=GSTP1 PE=2 SV=1
2	3.2	1	Q5JTD5	Q5JTD5_HUMAN	cDNA FLJ50818, highly similar to Protein YIPF3 OS=Homo sapiens PE=2 SV=1
1.51	19.3	1	F5H7R9	F5H7R9_HUMAN	Parathymosin (Fragment) OS=Homo sapiens GN=PTMS PE=2 SV=1
2	4.9	1	P30043	BLVRB_HUMAN	Flavin reductase (NADPH) OS=Homo sapiens GN=BLVRB PE=1 SV=3
0.13	9.1	1	P01771	HV310_HUMAN	Ig heavy chain V-III region HIL OS=Homo sapiens PE=1 SV=1
2	6.1	1	R4GMY4	R4GMY4_HUMAN	Neuroblastoma suppressor of tumorigenicity 1 (Fragment) OS=Homo sapiens GN=NBL1 PE=4 SV=1
2	1.8	1	Q5FWE3	PRRT3_HUMAN	Proline-rich transmembrane protein 3 OS=Homo sapiens GN=PRRT3 PE=1 SV=3
2	16.5	1	Q5NV70	Q5NV70_HUMAN	V1-11 protein (Fragment) OS=Homo sapiens GN=V1-11 PE=4 SV=1
2	2	1	Q53FL7	Q53FL7_HUMAN	Vascular cell adhesion molecule 1 isoform a variant (Fragment) OS=Homo sapiens PE=2 SV=1
2	2.3	1	O75628	REM1_HUMAN	REVERSED GTP-binding protein REM 1 OS=Homo sapiens GN=REM1 PE=1 SV=2
0.34	2.1	1	Q53HU8	Q53HU8_HUMAN	Vimentin variant (Fragment) OS=Homo sapiens PE=2 SV=1
2	3.2	1	Q5STZ8	Q5STZ8_HUMAN	ATP-binding cassette sub-family F member 1 (Fragment) OS=Homo sapiens GN=ABCF1 PE=2 SV=2
0.32	14.3	1	P23582	ANFC_HUMAN	C-type natriuretic peptide OS=Homo sapiens GN=NPPC PE=1 SV=1
2	1.1	1	P39059	COFA1_HUMAN	Collagen alpha-1(XV) chain OS=Homo sapiens GN=COL15A1 PE=1 SV=2
2	19.5	1	F2Z337	F2Z337_HUMAN	Myoglobin (Fragment) OS=Homo sapiens GN=MB PE=2 SV=1
2	1.3	1	Q9UN70	PCDGK_HUMAN	Protocadherin gamma-C3 OS=Homo sapiens GN=PCDHGC3 PE=1 SV=1
2	5.6	1	P20851	C4BPB_HUMAN	C4b-binding protein beta chain OS=Homo sapiens GN=C4BPB PE=1 SV=1
0.08	1.8	1	B4E240	B4E240_HUMAN	REVERSED cDNA FLJ58827, highly similar to UBX domain-containing protein 2 OS=Homo sapiens PE=2 SV=1
0.91	3.3	1	Q5HYM1	Q5HYM1_HUMAN	Putative uncharacterized protein DKFZp686O1553 (Fragment) OS=Homo sapiens GN=DKFZp686O1553 PE=1 SV=1
1.7	1.7	1	D6RAR4	D6RAR4_HUMAN	Hepatocyte growth factor activator OS=Homo sapiens GN=HGFAC PE=2 SV=1
2	6.5	1	A6XND1	A6XND1_HUMAN	Insulin-like growth factor binding protein 3 isoform b OS=Homo sapiens PE=2 SV=1
1.29	0.7	1	Q6P9G8	Q6P9G8_HUMAN	Family with sequence similarity 184, member A OS=Homo sapiens GN=FAM184A PE=2 SV=2
2	2.2	1	B3KNK9	B3KNK9_HUMAN	Golgi phosphoprotein 2, isoform CRA_a OS=Homo sapiens GN=GOLPH2 PE=2 SV=1
1.31	7.9	1	D3JV41	D3JV41_HUMAN	Thrombocidin-2 antimicrobial variant (Fragment) OS=Homo sapiens PE=2 SV=1
2	6.5	1	Q59GC4	Q59GC4_HUMAN	Transcription factor E2F5 variant (Fragment) OS=Homo sapiens PE=2 SV=1
0.36	29.6	1	Q6FGG5	Q6FGG5_HUMAN	SCRG1 protein OS=Homo sapiens GN=SCRG1 PE=2 SV=1
0.43	4.1	1	H0YEB6	H0YEB6_HUMAN	REVERSED Sjoegren syndrome/scleroderma autoantigen 1 (Fragment) OS=Homo sapiens GN=SSSCA1 PE=2 SV=1
2	2	1	A8K5A9	A8K5A9_HUMAN	cDNA FLJ77532, highly similar to Homo sapiens zinc finger and SCAN domain containing 2 (ZSCAN2), transcript variant 1, mRNA OS=Homo sapiens PE=2 SV=1
2	0.3	1	O75643	U520_HUMAN	U5 small nuclear ribonucleoprotein 200 kDa helicase OS=Homo sapiens GN=SNRNP200 PE=1 SV=2
2	0.4	1	Q9Y2E4	DIP2C_HUMAN	Disco-interacting protein 2 homolog C OS=Homo sapiens GN=DIP2C PE=2 SV=2
2	7.9	1	A5H458	A5H458_HUMAN	Heparan sulfate 3-O-sulfotransferase 4 (Fragment) OS=Homo sapiens GN=HS3ST4 PE=2 SV=1
2	13.4	1	E5RJW2	E5RJW2_HUMAN	Ly-6/neurotoxin-like protein 1 (Fragment) OS=Homo sapiens GN=LYNX1 PE=2 SV=1
2.01	5	1	P05937	CALB1_HUMAN	Calbindin OS=Homo sapiens GN=CALB1 PE=1 SV=2
2	10.1	1	E7ESF5	E7ESF5_HUMAN	Calcitonin gene-related peptide 2 OS=Homo sapiens GN=CALCB PE=2 SV=1
1.74	2.8	1	Q8TEG0	Q8TEG0_HUMAN	FLJ00237 protein (Fragment) OS=Homo sapiens GN=FLJ00237 PE=2 SV=1
2	5.9	1	Q9BUJ0	ABHEA_HUMAN	Alpha/beta hydrolase domain-containing protein 14A OS=Homo sapiens GN=ABHD14A PE=2 SV=2
2	3.5	1	B4DJ06	B4DJ06_HUMAN	cDNA FLJ56620 OS=Homo sapiens PE=2 SV=1
0.59	2.4	1	D3DRE0	D3DRE0_HUMAN	Fibroblast growth factor receptor 2 (Bacteria-expressed kinase, keratinocyte growth factor receptor, craniofacial dysostosis 1, Crouzon syndrome, Pfeiffer syndrome, Jackson-Weiss syndrome), isoform CRA_e OS=Homo sapiens GN=FGFR2 PE=4 SV=1
2	0.5	1	P24043	LAMA2_HUMAN	Laminin subunit alpha-2 OS=Homo sapiens GN=LAMA2 PE=1 SV=4
2	4.7	1	Q96DM2	Q96DM2_HUMAN	cDNA FLJ32631 fis, clone SYNOV1000164 OS=Homo sapiens PE=2 SV=1
2	1.4	1	Q9UPU3	SORC3_HUMAN	VPS10 domain-containing receptor SorCS3 OS=Homo sapiens GN=SORCS3 PE=2 SV=2
2	3.2	1	B4E394	B4E394_HUMAN	cDNA FLJ51483, highly similar to Multiple inositol polyphosphate phosphatase 1 (EC 3.1.3.62) OS=Homo sapiens PE=2 SV=1
1	10.9	1	P03950	ANGI_HUMAN	Angiogenin OS=Homo sapiens GN=ANG PE=1 SV=1
2	1.2	1	B2RCC8	B2RCC8_HUMAN	cDNA, FLJ95990 OS=Homo sapiens PE=2 SV=1
2.01	1.5	1	B7ZLJ8	B7ZLJ8_HUMAN	SEZ6L protein OS=Homo sapiens GN=SEZ6L PE=2 SV=1
2	3.1	1	F8WA83	F8WA83_HUMAN	Protein disulfide-isomerase A6 OS=Homo sapiens GN=PDIA6 PE=2 SV=1
2	3.2	1	B4DKD2	B4DKD2_HUMAN	Disintegrin and metalloproteinase domain-containing protein 11 OS=Homo sapiens GN=ADAM11 PE=2 SV=1
2	6.3	1	Q3LID8	Q3LID8_HUMAN	Neurexophilin OS=Homo sapiens GN=Nbla00697 PE=2 SV=1
2	2.7	1	B4DF37	B4DF37_HUMAN	cDNA FLJ52671, highly similar to SRR1-like protein OS=Homo sapiens PE=2 SV=1
1.38	3.3	1	B4E1V6	B4E1V6_HUMAN	cDNA FLJ54235, highly similar to Ceroid-lipofuscinosis neuronal protein 5 OS=Homo sapiens PE=2 SV=1
0.25	2	1	E9PL22	E9PL22_HUMAN	Hypoxia up-regulated protein 1 OS=Homo sapiens GN=HYOU1 PE=2 SV=1
0.09	17.9	1	Q2F831	Q2F831_HUMAN	Tyrosine 3-monooxygenasea/tryptophan 5-monooxygenase activation protein zeta (Fragment) OS=Homo sapiens PE=2 SV=1
2	4	1	Q6LEU8	Q6LEU8_HUMAN	SPINT2 protein (Fragment) OS=Homo sapiens GN=SPINT2 PE=2 SV=1
2.04	0.8	1	Q14112	NID2_HUMAN	Nidogen-2 OS=Homo sapiens GN=NID2 PE=1 SV=3
0.1	0	1	Q9UKK3	PARP4_HUMAN	REVERSED Poly [ADP-ribose] polymerase 4 OS=Homo sapiens GN=PARP4 PE=1 SV=3
0.12	1.8	1	F8WEB5	F8WEB5_HUMAN	Netrin-G1 OS=Homo sapiens GN=NTNG1 PE=2 SV=1
2	5.4	1	Q9BRL5	Q9BRL5_HUMAN	CALM3 protein OS=Homo sapiens PE=2 SV=1
0.23	7.2	1	Q53EY8	Q53EY8_HUMAN	Adenylate kinase 1 variant (Fragment) OS=Homo sapiens PE=2 SV=1
2	8	1	C9JMJ2	C9JMJ2_HUMAN	Secreted frizzled-related protein 4 (Fragment) OS=Homo sapiens GN=SFRP4 PE=2 SV=1
1.64	1.3	1	P80108	PHLD_HUMAN	Phosphatidylinositol-glycan-specific phospholipase D OS=Homo sapiens GN=GPLD1 PE=1 SV=3
2	1.7	1	B4DJ54	B4DJ54_HUMAN	cDNA FLJ53010, highly similar to Soluble calcium-activated nucleotidase 1 (EC 3.6.1.6) OS=Homo sapiens PE=2 SV=1
2	14.4	1	J3QKN1	J3QKN1_HUMAN	FXYD domain containing ion transport regulator 6, isoform CRA_b OS=Homo sapiens GN=FXYD6 PE=4 SV=1
2	1	1	Q4QQH1	Q4QQH1_HUMAN	SLIT and NTRK-like family, member 5 OS=Homo sapiens GN=SLITRK5 PE=2 SV=1
2	38.9	1	H7BZ18	H7BZ18_HUMAN	Multiple coagulation factor deficiency protein 2 (Fragment) OS=Homo sapiens GN=MCFD2 PE=2 SV=1
2	5.8	1	Q6FHE2	Q6FHE2_HUMAN	ICAM2 protein OS=Homo sapiens GN=ICAM2 PE=2 SV=1
0.45	4.7	1	Q9Y2D0	CAH5B_HUMAN	Carbonic anhydrase 5B, mitochondrial OS=Homo sapiens GN=CA5B PE=1 SV=1
1.39	5.3	1	C9IYR0	C9IYR0_HUMAN	REVERSED Transcription regulator protein BACH1 (Fragment) OS=Homo sapiens GN=BACH1 PE=2 SV=1
0.63	3.5	1	H3BUX1	H3BUX1_HUMAN	Mesothelin (Fragment) OS=Homo sapiens GN=MSLN PE=2 SV=1
0.18	1.8	1	Q96IU6	Q96IU6_HUMAN	COCH protein OS=Homo sapiens GN=COCH PE=2 SV=1
2	4.6	1	Q9HBR1	Q9HBR1_HUMAN	Putative uncharacterized protein OS=Homo sapiens PE=2 SV=1
2	1.4	1	Q9Y6P1	Q9Y6P1_HUMAN	MLL (Fragment) OS=Homo sapiens GN=MLL PE=2 SV=1
2	2	1	P0DKV0	S31C1_HUMAN	Spermatogenesis-associated protein 31C1 OS=Homo sapiens GN=SPATA31C1 PE=2 SV=1
0.3	2.8	1	Q86V86	PIM3_HUMAN	Serine/threonine-protein kinase pim-3 OS=Homo sapiens GN=PIM3 PE=1 SV=3
2.01	4.8	1	Q5URX0	Q5URX0_HUMAN	Beta-hexosaminidase subunit beta OS=Homo sapiens GN=HEXB PE=2 SV=1
2	5.7	1	F5H283	F5H283_HUMAN	Testican-2 OS=Homo sapiens GN=SPOCK2 PE=2 SV=1
0.87	3.8	1	A8K2Q6	A8K2Q6_HUMAN	Peptidyl-prolyl cis-trans isomerase OS=Homo sapiens PE=2 SV=1
0.17	2.5	1	Q05DJ8	Q05DJ8_HUMAN	HTRA1 protein (Fragment) OS=Homo sapiens GN=HTRA1 PE=2 SV=1
2	1.5	1	E7ES19	E7ES19_HUMAN	Thrombospondin-4 OS=Homo sapiens GN=THBS4 PE=2 SV=1
2	26.3	1	F5H6G8	F5H6G8_HUMAN	MANSC domain-containing protein 1 (Fragment) OS=Homo sapiens GN=MANSC1 PE=2 SV=1
0.98	10.1	1	P01708	LV205_HUMAN	Ig lambda chain V-II region BUR OS=Homo sapiens PE=1 SV=1
2	2.7	1	Q68D28	Q68D28_HUMAN	Carbonic anhydrase-related protein 10 OS=Homo sapiens GN=DKFZp686I20267 PE=2 SV=1
2	16.7	1	P01714	LV301_HUMAN	Ig lambda chain V-III region SH OS=Homo sapiens PE=1 SV=1
0.17	1.1	1	E9PAU2	E9PAU2_HUMAN	Ribonucleoprotein PTB-binding 1 OS=Homo sapiens GN=RAVER1 PE=4 SV=1
0.25	1.9	1	B4DR87	B4DR87_HUMAN	Procollagen-lysine,2-oxoglutarate 5-dioxygenase 1 OS=Homo sapiens GN=PLOD1 PE=2 SV=1
1.77	1.2	1	G3XAD4	G3XAD4_HUMAN	Contactin 4, isoform CRA_e OS=Homo sapiens GN=CNTN4 PE=2 SV=1
0.12	2.3	1	Q9BZQ2	SHP1L_HUMAN	SHC SH2 domain-binding protein 1-like protein OS=Homo sapiens GN=SHCBP1L PE=1 SV=2
0.2	0.7	1	Q96ST3	SIN3A_HUMAN	Paired amphipathic helix protein Sin3a OS=Homo sapiens GN=SIN3A PE=1 SV=2
2	1.2	1	Q8N3T6	T132C_HUMAN	Transmembrane protein 132C OS=Homo sapiens GN=TMEM132C PE=2 SV=3
0.77	0.9	1	F4ZW66	F4ZW66_HUMAN	NF110b OS=Homo sapiens PE=2 SV=1
2	5.3	1	O15335	CHAD_HUMAN	Chondroadherin OS=Homo sapiens GN=CHAD PE=2 SV=2
2.12	0.6	1	O15230	LAMA5_HUMAN	Laminin subunit alpha-5 OS=Homo sapiens GN=LAMA5 PE=1 SV=8
0.86	7.3	1	A2J1N7	A2J1N7_HUMAN	Rheumatoid factor RF-ET10 (Fragment) OS=Homo sapiens PE=2 SV=1
2	2.6	1	Q7Z3X3	Q7Z3X3_HUMAN	Putative uncharacterized protein DKFZp686E12166 OS=Homo sapiens GN=DKFZp686E12166 PE=2 SV=1
0.51	1	1	A1L4H1	SRCRL_HUMAN	Soluble scavenger receptor cysteine-rich domain-containing protein SSC5D OS=Homo sapiens GN=SSC5D PE=2 SV=3
2	8.5	1	B4E0I3	B4E0I3_HUMAN	Interleukin-1 receptor-like 1 OS=Homo sapiens GN=IL1RL1 PE=2 SV=1
2.06	1.7	1	Q59G70	Q59G70_HUMAN	Mannosyl (Alpha-1,3-)-glycoprotein beta-1,2-N-acetylglucosaminyltransferase variant (Fragment) OS=Homo sapiens PE=2 SV=1
0.53	1.1	1	P08572	CO4A2_HUMAN	Collagen alpha-2(IV) chain OS=Homo sapiens GN=COL4A2 PE=1 SV=4
2	2.1	1	Q96ID5	IGS21_HUMAN	Immunoglobulin superfamily member 21 OS=Homo sapiens GN=IGSF21 PE=2 SV=1
0.58	4.4	1	Q9HAH9	Q9HAH9_HUMAN	cDNA FLJ11598 fis, clone HEMBA1003866, moderately similar to Mus musculus semaphorin VIa mRNA OS=Homo sapiens PE=2 SV=1
0.42	1.7	1	Q13421-2	MSLN_HUMAN	REVERSED Isoform 3 of Mesothelin OS=Homo sapiens GN=MSLN
2	6.5	1	Q9UNH2	Q9UNH2_HUMAN	MC51L-53L-54L homolog (Fragment) OS=Homo sapiens PE=2 SV=1
0.25	4	1	Q5VX04	Q5VX04_HUMAN	5-hydroxytryptamine receptor 7 OS=Homo sapiens GN=HTR7 PE=2 SV=1
2	7.7	1	E7ESX4	E7ESX4_HUMAN	RING-box protein 2 (Fragment) OS=Homo sapiens GN=SAG PE=2 SV=1
0.12	1	1	P86452	ZBED6_HUMAN	Zinc finger BED domain-containing protein 6 OS=Homo sapiens GN=ZBED6 PE=3 SV=1
2	0.2	1	P21817	RYR1_HUMAN	Ryanodine receptor 1 OS=Homo sapiens GN=RYR1 PE=1 SV=3
2	3.1	1	Q5VWE5	Q5VWE5_HUMAN	Neurotrophic tyrosine kinase, receptor, type 2, isoform CRA_a OS=Homo sapiens GN=NTRK2 PE=2 SV=1
2	6	1	Q8NF07	Q8NF07_HUMAN	FLJ00397 protein (Fragment) OS=Homo sapiens GN=FLJ00397 PE=2 SV=1
0.11	7.8	1	I4AY87	I4AY87_HUMAN	Macrophage migration inhibitory factor (Fragment) OS=Homo sapiens PE=2 SV=1
2	1.5	1	Q59E93	Q59E93_HUMAN	Membrane alanine aminopeptidase variant (Fragment) OS=Homo sapiens PE=2 SV=1
2	16.4	1	Q5NV82	Q5NV82_HUMAN	V4-2 protein (Fragment) OS=Homo sapiens GN=IGLV5-45 PE=1 SV=1
0.61	0.7	1	F8VY01	F8VY01_HUMAN	FYVE, RhoGEF and PH domain-containing protein 6 OS=Homo sapiens GN=FGD6 PE=2 SV=1
0.3	2.3	1	Q59FZ0	Q59FZ0_HUMAN	LAMP1 protein variant (Fragment) OS=Homo sapiens PE=2 SV=1
0.22	0.9	1	P11047	LAMC1_HUMAN	Laminin subunit gamma-1 OS=Homo sapiens GN=LAMC1 PE=1 SV=3
2	2.8	1	Q9NWT1	PK1IP_HUMAN	p21-activated protein kinase-interacting protein 1 OS=Homo sapiens GN=PAK1IP1 PE=1 SV=2
2	4.6	1	Q6LET3	Q6LET3_HUMAN	HPRT1 protein (Fragment) OS=Homo sapiens GN=HPRT1 PE=2 SV=1
2	2.7	1	Q9H955	Q9H955_HUMAN	cDNA FLJ12995 fis, clone NT2RP3000233, weakly similar to RING CANAL PROTEIN OS=Homo sapiens PE=2 SV=1
2	1.8	1	B4DNE0	B4DNE0_HUMAN	cDNA FLJ52573, highly similar to Elongation factor 1-alpha 1 OS=Homo sapiens PE=2 SV=1
2	2.9	1	J3QKW8	J3QKW8_HUMAN	Clusterin OS=Homo sapiens GN=CLUL1 PE=3 SV=1
2	16.6	1	Q5BIV9	SPRN_HUMAN	Shadow of prion protein OS=Homo sapiens GN=SPRN PE=2 SV=1
2	2.6	1	Q4VAP1	Q4VAP1_HUMAN	ZP2 protein OS=Homo sapiens GN=ZP2 PE=2 SV=1
2	1.8	1	Q86UN2	R4RL1_HUMAN	Reticulon-4 receptor-like 1 OS=Homo sapiens GN=RTN4RL1 PE=2 SV=1
2	1.7	1	Q32NF0	Q32NF0_HUMAN	TSC1 protein (Fragment) OS=Homo sapiens GN=TSC1 PE=2 SV=1
2.04	2	1	Q59EA3	Q59EA3_HUMAN	Cadherin 5, type 2 preproprotein variant (Fragment) OS=Homo sapiens PE=2 SV=1
0.11	6.7	1	A2NW98	A2NW98_HUMAN	Rheumatoid factor light chain variable region (Fragment) OS=Homo sapiens PE=2 SV=1
0.12	5.9	1	Q8WZ46	Q8WZ46_HUMAN	Zinc finger protein OS=Homo sapiens PE=2 SV=1
0.11	4.2	1	Q8NGV0	OR2Y1_HUMAN	Olfactory receptor 2Y1 OS=Homo sapiens GN=OR2Y1 PE=2 SV=1
0.17	3.8	1	Q4VC05	BCL7A_HUMAN	B-cell CLL/lymphoma 7 protein family member A OS=Homo sapiens GN=BCL7A PE=1 SV=1
2	3.8	1	Q9BUM6	Q9BUM6_HUMAN	COL6A2 protein OS=Homo sapiens PE=2 SV=1
2	1.9	1	Q68EN5	K895L_HUMAN	REVERSED Uncharacterized protein KIAA0895-like OS=Homo sapiens GN=KIAA0895L PE=2 SV=1
2	4.2	1	B1AKK2	B1AKK2_HUMAN	Dimethylarginine dimethylaminohydrolase 1, isoform CRA_b OS=Homo sapiens GN=DDAH1 PE=2 SV=1
0.27	3	1	Q9NR34	MA1C1_HUMAN	Mannosyl-oligosaccharide 1,2-alpha-mannosidase IC OS=Homo sapiens GN=MAN1C1 PE=2 SV=1
0.93	0.8	1	B1PS43	B1PS43_HUMAN	Myosin heavy chain 11 smooth muscle isoform OS=Homo sapiens GN=MYH11 PE=2 SV=1
0.13	1.7	1	B4E3Q4	B4E3Q4_HUMAN	Adenosine deaminase CECR1 OS=Homo sapiens GN=CECR1 PE=2 SV=1
2	1.7	1	F5H752	F5H752_HUMAN	Contactin-6 OS=Homo sapiens GN=CNTN6 PE=2 SV=1
2	2.1	1	Q6IBK5	Q6IBK5_HUMAN	GTF2F1 protein OS=Homo sapiens GN=GTF2F1 PE=2 SV=1
2	1	1	A6NGG8	CB071_HUMAN	Uncharacterized protein C2orf71 OS=Homo sapiens GN=C2orf71 PE=1 SV=1
2	11.1	1	O95969	SG1D2_HUMAN	Secretoglobin family 1D member 2 OS=Homo sapiens GN=SCGB1D2 PE=2 SV=1
0.3	8.6	1	E9PQS8	E9PQS8_HUMAN	Sodium channel subunit beta-3 (Fragment) OS=Homo sapiens GN=SCN3B PE=2 SV=1
0.3	4.6	1	Q53H78	Q53H78_HUMAN	Calcium/calmodulin-dependent protein kinase IIB isoform 2 variant (Fragment) OS=Homo sapiens PE=2 SV=1
2	21.9	1	H3BT58	H3BT58_HUMAN	Coactosin-like protein OS=Homo sapiens GN=COTL1 PE=2 SV=1
0.59	7.5	1	H0Y3U0	H0Y3U0_HUMAN	Parvalbumin alpha (Fragment) OS=Homo sapiens GN=PVALB PE=4 SV=1
2.01	1	1	E9PJZ7	E9PJZ7_HUMAN	REVERSED Liprin-alpha-1 OS=Homo sapiens GN=PPFIA1 PE=2 SV=1
1.77	4	1	Q5U000	Q5U000_HUMAN	Cathepsin Z OS=Homo sapiens PE=2 SV=1
1.86	2.6	1	Q86XJ5	Q86XJ5_HUMAN	JRK protein OS=Homo sapiens GN=JRK PE=2 SV=1
2	0.6	1	Q53TD9	Q53TD9_HUMAN	Putative uncharacterized protein ZFHX1B (Fragment) OS=Homo sapiens GN=ZFHX1B PE=2 SV=1
0.26	3.6	1	D6RF48	D6RF48_HUMAN	REVERSED Syntaxin-18 OS=Homo sapiens GN=STX18 PE=2 SV=1
2	14.1	1	Q6IBD2	Q6IBD2_HUMAN	CST6 protein OS=Homo sapiens GN=CST6 PE=2 SV=1
2	2.3	1	Q9H2E1	Q9H2E1_HUMAN	Neuropilin 1, isoform CRA_d OS=Homo sapiens GN=NRP1 PE=2 SV=1
2	6.6	1	Q59EU5	Q59EU5_HUMAN	Pleckstrin homology domain containing, family B (Evectins) member 1 variant (Fragment) OS=Homo sapiens PE=2 SV=1
0.47	8.3	1	I3L2X4	I3L2X4_HUMAN	Sex hormone-binding globulin OS=Homo sapiens GN=SHBG PE=2 SV=1
2	1.6	1	E7ESX1	E7ESX1_HUMAN	Chordin OS=Homo sapiens GN=CHRD PE=2 SV=1
2	3.4	1	Q8NAB7	Q8NAB7_HUMAN	cDNA FLJ35635 fis, clone SPLEN2011805, highly similar to BONE/CARTILAGE PROTEOGLYCAN I OS=Homo sapiens PE=2 SV=1
0.1	8.8	1	E9PI26	E9PI26_HUMAN	General transcription factor IIH subunit 1 OS=Homo sapiens GN=GTF2H1 PE=2 SV=1
0.13	1.9	1	B4DV64	B4DV64_HUMAN	REVERSED cDNA FLJ61420, highly similar to Homo sapiens olfactomedin 4 (OLFM4), mRNA OS=Homo sapiens PE=2 SV=1
0.09	2.1	1	B4DQ98	B4DQ98_HUMAN	cDNA FLJ55135, highly similar to Di-N-acetylchitobiase (EC 3.2.1.-) OS=Homo sapiens PE=2 SV=1
2.01	2.7	1	Q8NF20	Q8NF20_HUMAN	FLJ00382 protein (Fragment) OS=Homo sapiens GN=FLJ00382 PE=1 SV=1
2	2.3	1	O95196	CSPG5_HUMAN	Chondroitin sulfate proteoglycan 5 OS=Homo sapiens GN=CSPG5 PE=1 SV=3
1.35	3.5	1	P67936-2	TPM4_HUMAN	Isoform 2 of Tropomyosin alpha-4 chain OS=Homo sapiens GN=TPM4
0.49	3.8	1	Q9UNN8	EPCR_HUMAN	Endothelial protein C receptor OS=Homo sapiens GN=PROCR PE=1 SV=1
2	2.6	1	A8K9L8	A8K9L8_HUMAN	cDNA FLJ76964, highly similar to Homo sapiens tropomodulin 2 (neuronal) (TMOD2), mRNA OS=Homo sapiens PE=2 SV=1
0.15	2.6	1	B4DGU8	B4DGU8_HUMAN	cDNA FLJ60110, highly similar to Homo sapiens leucine-rich repeats and IQ motif containing 2 (LRRIQ2), mRNA OS=Homo sapiens PE=2 SV=1
0.18	5.6	1	K7ES54	K7ES54_HUMAN	Follistatin-related protein 3 (Fragment) OS=Homo sapiens GN=FSTL3 PE=4 SV=1
2	8	1	B4DHF1	B4DHF1_HUMAN	REVERSED cDNA FLJ61749 OS=Homo sapiens PE=2 SV=1
0.14	0.3	1	Q6ZRS2	SRCAP_HUMAN	Helicase SRCAP OS=Homo sapiens GN=SRCAP PE=1 SV=3
1.72	1.2	1	Q9UHK0	NUFP1_HUMAN	Nuclear fragile X mental retardation-interacting protein 1 OS=Homo sapiens GN=NUFIP1 PE=1 SV=2
0.07	0.1	1	Q70CQ2	UBP34_HUMAN	REVERSED Ubiquitin carboxyl-terminal hydrolase 34 OS=Homo sapiens GN=USP34 PE=1 SV=2
2	10.3	1	Q6IB11	Q6IB11_HUMAN	PGRMC1 protein OS=Homo sapiens GN=PGRMC1 PE=2 SV=1
0.52	5.9	1	Q9NZC2-2	TREM2_HUMAN	Isoform 2 of Triggering receptor expressed on myeloid cells 2 OS=Homo sapiens GN=TREM2
2	6.2	1	Q86VD6	Q86VD6_HUMAN	LOC339742 protein (Fragment) OS=Homo sapiens GN=LOC339742 PE=2 SV=1
0.11	5.1	1	Q6ZNK1	Q6ZNK1_HUMAN	FLJ00314 protein (Fragment) OS=Homo sapiens GN=FLJ00314 PE=2 SV=1
0.17	7.7	1	Q6P5T8	Q6P5T8_HUMAN	ADAM17 protein OS=Homo sapiens GN=ADAM17 PE=2 SV=1
2	2.5	1	B4DEQ8	B4DEQ8_HUMAN	cDNA FLJ60443, moderately similar to Protocadherin-8 OS=Homo sapiens PE=2 SV=1
2	7	1	C9JXB2	C9JXB2_HUMAN	Semaphorin-3G (Fragment) OS=Homo sapiens GN=SEMA3G PE=2 SV=1
2	4.4	1	G8JLH6	G8JLH6_HUMAN	CD9 antigen (Fragment) OS=Homo sapiens GN=CD9 PE=2 SV=1
0.63	2.8	1	B4DVJ0	B4DVJ0_HUMAN	Glucose-6-phosphate isomerase OS=Homo sapiens PE=2 SV=1
2	16.7	1	P01606	KV114_HUMAN	Ig kappa chain V-I region OU OS=Homo sapiens PE=1 SV=1
2	6.1	1	Q56VW5	Q56VW5_HUMAN	REVERSED Transformation-related protein 4 OS=Homo sapiens PE=2 SV=1
0.17	7.1	1	M0QZI8	M0QZI8_HUMAN	Kallikrein-11 (Fragment) OS=Homo sapiens GN=KLK11 PE=3 SV=1
2.05	2.5	1	B4DEL6	B4DEL6_HUMAN	cDNA FLJ59669, highly similar to Homo sapiens phospholipase D family, member 3 (PLD3), transcript variant 1, mRNA OS=Homo sapiens PE=2 SV=1
0.35	0.6	1	Q9P2D1	CHD7_HUMAN	Chromodomain-helicase-DNA-binding protein 7 OS=Homo sapiens GN=CHD7 PE=1 SV=3
0.14	3.5	1	Q9Y3V7	Q9Y3V7_HUMAN	Putative uncharacterized protein DKFZp586A1519 (Fragment) OS=Homo sapiens GN=DKFZp586A1519 PE=2 SV=1
0.11	1.6	1	B3KS46	B3KS46_HUMAN	REVERSED cDNA FLJ35454 fis, clone SMINT2004473, highly similar to Homo sapiens aarF domain containing kinase 5 (ADCK5), mRNA OS=Homo sapiens PE=2 SV=1
2	2.3	1	Q5JVE7	Q5JVE7_HUMAN	Coagulation factor X OS=Homo sapiens GN=F10 PE=2 SV=1
0.18	5.3	1	Q9NSI1	Q9NSI1_HUMAN	REVERSED HCG401283 OS=Homo sapiens GN=PRED57 PE=4 SV=1
2	1.4	1	E9PG71	E9PG71_HUMAN	Ephrin type-A receptor 4 OS=Homo sapiens GN=EPHA4 PE=2 SV=1
2	3.9	1	Q8N7M0	TC1D1_HUMAN	REVERSED Tctex1 domain-containing protein 1 OS=Homo sapiens GN=TCTEX1D1 PE=2 SV=2
2	12.9	1	Q8N9F6	Q8N9F6_HUMAN	cDNA FLJ37453 fis, clone BRAWH2010754 OS=Homo sapiens PE=2 SV=1
2.12	10.6	1	Q9NPD7	NRN1_HUMAN	Neuritin OS=Homo sapiens GN=NRN1 PE=1 SV=1
2	2.6	1	Q6ZNA0	Q6ZNA0_HUMAN	cDNA FLJ16290 fis, clone OCBBF2019684, highly similar to ZINC FINGER PROTEIN 29 OS=Homo sapiens PE=2 SV=1
0.61	1.7	1	Q6AW96	Q6AW96_HUMAN	Putative uncharacterized protein DKFZp686A20205 OS=Homo sapiens GN=DKFZp686A20205 PE=2 SV=1
2	1.6	1	Q15375	EPHA7_HUMAN	Ephrin type-A receptor 7 OS=Homo sapiens GN=EPHA7 PE=1 SV=3
1.17	10.5	1	Q5BLP8	CD048_HUMAN	Neuropeptide-like protein C4orf48 OS=Homo sapiens GN=C4orf48 PE=1 SV=3
2	2.1	1	O60462-5	NRP2_HUMAN	Isoform B5 of Neuropilin-2 OS=Homo sapiens GN=NRP2
0.72	4.9	1	B5MCZ9	B5MCZ9_HUMAN	Glutaminyl-peptide cyclotransferase (Fragment) OS=Homo sapiens GN=QPCT PE=2 SV=1
2	6.9	1	C9J8S2	C9J8S2_HUMAN	Retinoic acid receptor responder protein 2 (Fragment) OS=Homo sapiens GN=RARRES2 PE=2 SV=1
2.01	1.6	1	Q5VST3	Q5VST3_HUMAN	Protein O-linked-mannose beta-1,2-N-acetylglucosaminyltransferase 1 OS=Homo sapiens GN=POMGNT1 PE=2 SV=1
2	5.6	1	B8ZWD9	B8ZWD9_HUMAN	Diazepam binding inhibitor, splice form 1D(2) OS=Homo sapiens GN=DBI PE=2 SV=1
0.11	2.7	1	Q15223	PVRL1_HUMAN	Poliovirus receptor-related protein 1 OS=Homo sapiens GN=PVRL1 PE=1 SV=3
2	1	1	Q1L838	Q1L838_HUMAN	GTBP-ALT OS=Homo sapiens GN=GTBP PE=3 SV=1
0.17	0.5	1	P49454	CENPF_HUMAN	Centromere protein F OS=Homo sapiens GN=CENPF PE=1 SV=2
2	5.7	1	Q9NSI5	IGSF5_HUMAN	Immunoglobulin superfamily member 5 OS=Homo sapiens GN=IGSF5 PE=2 SV=2
1.17	2.3	1	P16499	PDE6A_HUMAN	Rod cGMP-specific 3',5'-cyclic phosphodiesterase subunit alpha OS=Homo sapiens GN=PDE6A PE=1 SV=4
2	0.8	1	J3KQ96	J3KQ96_HUMAN	Treacle protein (Fragment) OS=Homo sapiens GN=TCOF1 PE=4 SV=1
2	1.1	1	Q8IV28	Q8IV28_HUMAN	NID2 protein OS=Homo sapiens GN=NID2 PE=2 SV=1
2	3.4	1	Q96KC0	Q96KC0_HUMAN	cDNA FLJ14373 fis, clone HEMBA1001595, highly similar to SEPTIN 2 HOMOLOG OS=Homo sapiens PE=2 SV=1
0.8	2.4	1	B3KQE3	B3KQE3_HUMAN	cDNA FLJ90319 fis, clone NT2RP2001538, highly similar to Paired amphipathic helix protein Sin3a OS=Homo sapiens PE=2 SV=1
2.01	8.9	1	P02776	PLF4_HUMAN	Platelet factor 4 OS=Homo sapiens GN=PF4 PE=1 SV=2
2	21.1	1	Q14645	Q14645_HUMAN	REVERSED Interferon alpha-2' (Fragment) OS=Homo sapiens PE=3 SV=1
2.02	1.1	1	A9X9L0	A9X9L0_HUMAN	Desmocollin 2 OS=Homo sapiens GN=DSC2 PE=2 SV=1
0.91	7.6	1	A2NB43	A2NB43_HUMAN	Cold agglutinin FS-1 H-chain (Fragment) OS=Homo sapiens GN=IGH@ PE=2 SV=1
2	2.7	1	Q9NZU7	CABP1_HUMAN	Calcium-binding protein 1 OS=Homo sapiens GN=CABP1 PE=1 SV=5
0.06	13.4	1	P01616	KV203_HUMAN	Ig kappa chain V-II region MIL OS=Homo sapiens PE=1 SV=1
2	3.2	1	Q59EM4	Q59EM4_HUMAN	Dipeptidyl-peptidase II variant (Fragment) OS=Homo sapiens PE=2 SV=1
0.09	5.9	1	Q9UL73	Q9UL73_HUMAN	Myosin-reactive immunoglobulin heavy chain variable region (Fragment) OS=Homo sapiens PE=2 SV=1
0.13	3.9	1	Q5JP01	Q5JP01_HUMAN	Histone-binding protein RBBP7 (Fragment) OS=Homo sapiens GN=RBBP7 PE=2 SV=1
0.12	0.8	1	E9PD53	E9PD53_HUMAN	REVERSED Structural maintenance of chromosomes protein OS=Homo sapiens GN=SMC4 PE=2 SV=1
2	1.1	1	G3V4V5	G3V4V5_HUMAN	E3 ubiquitin-protein ligase HECTD1 (Fragment) OS=Homo sapiens GN=HECTD1 PE=2 SV=1
0.15	7.3	1	Q7Z6V2	Q7Z6V2_HUMAN	Plasma alpha-L-fucosidase (Fragment) OS=Homo sapiens GN=FUCA2 PE=2 SV=1
0.15	1	1	B5MEF5	B5MEF5_HUMAN	REVERSED Sushi, nidogen and EGF-like domain-containing protein 1 OS=Homo sapiens GN=SNED1 PE=2 SV=2
2	1.5	1	Q53EY9	Q53EY9_HUMAN	F-box only protein 22 isoform a variant (Fragment) OS=Homo sapiens PE=2 SV=1
2	1.2	1	B4DTV8	B4DTV8_HUMAN	cDNA FLJ61399, highly similar to Spectrin alpha chain, brain OS=Homo sapiens PE=2 SV=1
2	1.3	1	Q68CS5	Q68CS5_HUMAN	Putative uncharacterized protein DKFZp781L0846 OS=Homo sapiens GN=DKFZp781L0846 PE=2 SV=1
0.25	6.1	1	B4E200	B4E200_HUMAN	cDNA FLJ57929, moderately similar to Peptidyl-prolyl cis-trans isomerase C (EC5.2.1.8) OS=Homo sapiens PE=2 SV=1
2	1	1	Q8IZC4	RTKN2_HUMAN	REVERSED Rhotekin-2 OS=Homo sapiens GN=RTKN2 PE=2 SV=1
0.46	5.7	1	A6NJ16	IV4F8_HUMAN	Putative V-set and immunoglobulin domain-containing-like protein IGHV4OR15-8 OS=Homo sapiens GN=IGHV4OR15-8 PE=5 SV=2
0.09	1.6	1	F5GYH2	F5GYH2_HUMAN	Lysine-specific demethylase 4C OS=Homo sapiens GN=KDM4C PE=2 SV=1
2	2.5	1	B4DRS4	B4DRS4_HUMAN	cDNA FLJ60139, highly similar to Homo sapiens HIV TAT specific factor 1 (HTATSF1), mRNA OS=Homo sapiens PE=2 SV=1
2	0.7	1	Q5TB80	CE162_HUMAN	Centrosomal protein of 162 kDa OS=Homo sapiens GN=KIAA1009 PE=1 SV=2
2	1.9	1	Q8IYW5	RN168_HUMAN	E3 ubiquitin-protein ligase RNF168 OS=Homo sapiens GN=RNF168 PE=1 SV=1
1	1.1	1	Q9UPM8	AP4E1_HUMAN	AP-4 complex subunit epsilon-1 OS=Homo sapiens GN=AP4E1 PE=1 SV=2
0.22	1.7	1	P13667	PDIA4_HUMAN	REVERSED Protein disulfide-isomerase A4 OS=Homo sapiens GN=PDIA4 PE=1 SV=2
1.21	9.4	1	J3KST8	J3KST8_HUMAN	Cytokine receptor-like factor 3 OS=Homo sapiens GN=CRLF3 PE=4 SV=1
2	7.2	1	Q9UJ94	CU104_HUMAN	Putative uncharacterized protein encoded C21orf104 OS=Homo sapiens GN=LINC00527 PE=5 SV=2
2	1.2	1	P42702	LIFR_HUMAN	Leukemia inhibitory factor receptor OS=Homo sapiens GN=LIFR PE=1 SV=1
2	8	1	Q6PI41	Q6PI41_HUMAN	AURKAIP1 protein (Fragment) OS=Homo sapiens GN=AURKAIP1 PE=2 SV=1
2.01	0.5	1	Q6NUR1	Q6NUR1_HUMAN	Non-SMC condensin I complex, subunit G OS=Homo sapiens GN=NCAPG PE=2 SV=1
2	0.3	1	K9MS24	K9MS24_HUMAN	Beta-spectrin non-erythrocytic 1 OS=Homo sapiens GN=SPTBN1 PE=2 SV=1
2	0.7	1	J3KTN9	J3KTN9_HUMAN	Probable E3 ubiquitin-protein ligase MARCH10 OS=Homo sapiens GN=MARCH10 PE=4 SV=1
0.77	3.5	1	B7Z856	B7Z856_HUMAN	GDNF family receptor alpha-1 OS=Homo sapiens GN=GFRA1 PE=2 SV=1
0.15	1.8	1	Q9BYG8	GSDMC_HUMAN	Gasdermin-C OS=Homo sapiens GN=GSDMC PE=2 SV=3
0.5	1.2	1	F5H0N2	F5H0N2_HUMAN	Neuregulin-2 OS=Homo sapiens GN=NRG2 PE=2 SV=1
2	3.2	1	Q9H2S6	TNMD_HUMAN	REVERSED Tenomodulin OS=Homo sapiens GN=TNMD PE=2 SV=1
2	3.4	1	H3BLU9	H3BLU9_HUMAN	REVERSED Tetratricopeptide repeat protein 24 (Fragment) OS=Homo sapiens GN=TTC24 PE=4 SV=1
2.01	0.2	1	Q13813-2	SPTN1_HUMAN	REVERSED Isoform 2 of Spectrin alpha chain, non-erythrocytic 1 OS=Homo sapiens GN=SPTAN1
0.5	1.4	1	G3V5P6	G3V5P6_HUMAN	Papilin OS=Homo sapiens GN=PAPLN PE=2 SV=1
2	6.1	1	B2R773	B2R773_HUMAN	cDNA, FLJ93312, highly similar to Homo sapiens adipose most abundant gene transcript 1 (APM1), mRNA OS=Homo sapiens PE=2 SV=1
2	5	1	J3QLK5	J3QLK5_HUMAN	Serine/threonine-protein kinase tousled-like 2 OS=Homo sapiens GN=TLK2 PE=4 SV=1
0.18	2.8	1	Q2YD88	Q2YD88_HUMAN	FAM129B protein (Fragment) OS=Homo sapiens GN=FAM129B PE=2 SV=1
2	6.4	1	Q6P3S4	Q6P3S4_HUMAN	CEBPA protein OS=Homo sapiens PE=2 SV=1
0.48	13.4	1	I3L3R4	I3L3R4_HUMAN	REVERSED Smoothelin-like protein 2 (Fragment) OS=Homo sapiens GN=SMTNL2 PE=2 SV=1
2	2.7	1	A0PJE0	A0PJE0_HUMAN	EHMT1 protein (Fragment) OS=Homo sapiens GN=EHMT1 PE=2 SV=1
0.41	2.6	1	A6NCF6	MA13P_HUMAN	Putative MAGE domain-containing protein MAGEA13P OS=Homo sapiens GN=MAGEA13P PE=5 SV=1
0.26	0.4	1	H0Y6I0	H0Y6I0_HUMAN	Golgin subfamily A member 4 (Fragment) OS=Homo sapiens GN=GOLGA4 PE=2 SV=1
2	4.5	1	F5GXS5	F5GXS5_HUMAN	Apolipoprotein F OS=Homo sapiens GN=APOF PE=2 SV=1
2	0.5	1	H0YFN7	H0YFN7_HUMAN	REVERSED Protein RIC1 homolog (Fragment) OS=Homo sapiens GN=KIAA1432 PE=4 SV=1
1.21	7.6	1	Q16192	Q16192_HUMAN	Orf3 5' of PD-ECGF/TP protein OS=Homo sapiens GN=orf3 5' of PD-ECGF/TP PE=2 SV=1
0.15	2.8	1	Q9BYV8-5	CEP41_HUMAN	Isoform 5 of Centrosomal protein of 41 kDa OS=Homo sapiens GN=CEP41
0.56	0.6	1	P08F94	PKHD1_HUMAN	Fibrocystin OS=Homo sapiens GN=PKHD1 PE=1 SV=1
2	0.7	1	E9PHY8	E9PHY8_HUMAN	Maestro heat-like repeat-containing protein family member 1 OS=Homo sapiens GN=MROH1 PE=2 SV=1
2	6.3	1	Q2VIL4	Q2VIL4_HUMAN	RcDNAJ9 (Fragment) OS=Homo sapiens PE=4 SV=1
2	1.7	1	H0YDE2	H0YDE2_HUMAN	Pleckstrin homology domain-containing family A member 7 (Fragment) OS=Homo sapiens GN=PLEKHA7 PE=4 SV=1
2	7	1	Q59GA9	Q59GA9_HUMAN	Phosphodiesterase 1B, calmodulin-dependent variant (Fragment) OS=Homo sapiens PE=2 SV=1
0.68	11.7	1	P01707	LV204_HUMAN	Ig lambda chain V-II region TRO OS=Homo sapiens PE=1 SV=1
1.59	2.3	1	H9KV63	H9KV63_HUMAN	Tudor domain-containing protein 1 OS=Homo sapiens GN=TDRD1 PE=2 SV=1
0.16	2.4	1	C9JC36	C9JC36_HUMAN	REVERSED Serine palmitoyltransferase 3 OS=Homo sapiens GN=SPTLC3 PE=2 SV=2
1.34	7.1	1	A2NYU7	A2NYU7_HUMAN	Heavy chain Fab (Fragment) OS=Homo sapiens PE=2 SV=1
2	0.8	1	Q9Y4D7	PLXD1_HUMAN	Plexin-D1 OS=Homo sapiens GN=PLXND1 PE=1 SV=3
2	1.7	1	Q53FR6	Q53FR6_HUMAN	Cartilage oligomeric matrix protein variant (Fragment) OS=Homo sapiens PE=2 SV=1
2	2.7	1	D1MER9	D1MER9_HUMAN	Glycoprotein V (Platelet) OS=Homo sapiens GN=GP5 PE=2 SV=1
2	7.6	1	Q8TBD0	Q8TBD0_HUMAN	Uncharacterized protein (Fragment) OS=Homo sapiens PE=2 SV=1
0.11	41.4	1	C6GLX9	C6GLX9_HUMAN	Putative uncharacterized protein OS=Homo sapiens PE=4 SV=1
2	0.9	1	Q9HC39	Q9HC39_HUMAN	REVERSED Putative uncharacterized protein OS=Homo sapiens PE=2 SV=1
0.39	2	1	B4DJB3	B4DJB3_HUMAN	cDNA FLJ55979, highly similar to Homo sapiens AE binding protein 1 (AEBP1), mRNA OS=Homo sapiens PE=2 SV=1
2	3.2	1	Q15554	TERF2_HUMAN	Telomeric repeat-binding factor 2 OS=Homo sapiens GN=TERF2 PE=1 SV=2
2	8.7	1	J3QKX8	J3QKX8_HUMAN	Src kinase-associated phosphoprotein 1 OS=Homo sapiens GN=SKAP1 PE=4 SV=1

## Sheet: Neurological Control
Unused	% Cov (95)	Peptides(95%)	Accession No.	Uniprot ID	Protein Name
439.03	92	2295	P02768	ALBU_HUMAN	Serum albumin OS=Homo sapiens GN=ALB PE=1 SV=2
2	90	2175	B2RBS8	B2RBS8_HUMAN	cDNA, FLJ95666, highly similar to Homo sapiens albumin (ALB), mRNA OS=Homo sapiens PE=2 SV=1
2	95.7	2127	F6KPG5	F6KPG5_HUMAN	Albumin (Fragment) OS=Homo sapiens PE=2 SV=1
4	88.9	1751	B4DPR2	B4DPR2_HUMAN	cDNA FLJ50830, highly similar to Serum albumin OS=Homo sapiens PE=2 SV=1
6	90.2	1716	Q56G89	Q56G89_HUMAN	Serum albumin OS=Homo sapiens PE=2 SV=1
173.28	77.5	569	P02787	TRFE_HUMAN	Serotransferrin OS=Homo sapiens GN=TF PE=1 SV=3
6	75.1	546	B4E1B2	B4E1B2_HUMAN	cDNA FLJ53691, highly similar to Serotransferrin OS=Homo sapiens PE=2 SV=1
4.21	73.1	332	Q6N089	Q6N089_HUMAN	Putative uncharacterized protein DKFZp686P15220 OS=Homo sapiens GN=DKFZp686P15220 PE=1 SV=1
86.88	69.5	330	Q6GMX6	Q6GMX6_HUMAN	IGH@ protein OS=Homo sapiens GN=IGH@ PE=1 SV=1
119.7	85.2	299	E9KL23	E9KL23_HUMAN	Epididymis secretory sperm binding protein Li 44a OS=Homo sapiens PE=2 SV=1
7.12	67.6	299	Q6MZQ6	Q6MZQ6_HUMAN	Putative uncharacterized protein DKFZp686G11190 OS=Homo sapiens GN=DKFZp686G11190 PE=1 SV=1
2	60.4	290	Q7Z351	Q7Z351_HUMAN	Putative uncharacterized protein DKFZp686N02209 OS=Homo sapiens GN=DKFZp686N02209 PE=2 SV=1
205.08	72.7	285	P01024	CO3_HUMAN	Complement C3 OS=Homo sapiens GN=C3 PE=1 SV=2
6.23	68.8	250	Q6N093	Q6N093_HUMAN	Putative uncharacterized protein DKFZp686I04196 (Fragment) OS=Homo sapiens GN=DKFZp686I04196 PE=1 SV=1
35.3	65.1	232	Q6PJF2	Q6PJF2_HUMAN	IGK@ protein OS=Homo sapiens GN=IGK@ PE=1 SV=1
4	52.8	227	Q68CN4	Q68CN4_HUMAN	Putative uncharacterized protein DKFZp686E23209 OS=Homo sapiens GN=DKFZp686E23209 PE=1 SV=2
0.3	44.9	225	Q7Z3Y4	Q7Z3Y4_HUMAN	Uncharacterized protein OS=Homo sapiens PE=1 SV=1
2	76.4	203	B4DI57	B4DI57_HUMAN	cDNA FLJ54111, highly similar to Serotransferrin OS=Homo sapiens PE=2 SV=1
36.11	85.9	198	D1MGQ2	D1MGQ2_HUMAN	Alpha-2 globin chain OS=Homo sapiens GN=HBA2 PE=2 SV=1
25.5	52.9	163	Q6MZX7	Q6MZX7_HUMAN	Putative uncharacterized protein DKFZp686M24218 OS=Homo sapiens GN=DKFZp686M24218 PE=1 SV=1
20.45	55.7	162	Q5EBM2	Q5EBM2_HUMAN	Uncharacterized protein OS=Homo sapiens PE=2 SV=1
8.17	57.4	162	B0UZ83	B0UZ83_HUMAN	Complement C4 beta chain OS=Homo sapiens GN=C4A PE=2 SV=1
156.4	55.9	160	P0C0L5	CO4B_HUMAN	Complement C4-B OS=Homo sapiens GN=C4B PE=1 SV=2
147.68	65.9	160	P01023	A2MG_HUMAN	Alpha-2-macroglobulin OS=Homo sapiens GN=A2M PE=1 SV=3
42.55	79.6	146	E9KL36	E9KL36_HUMAN	Epididymis tissue sperm binding protein Li 4a OS=Homo sapiens PE=2 SV=1
38.71	84.7	129	P41222	PTGDS_HUMAN	Prostaglandin-H2 D-isomerase OS=Homo sapiens GN=PTGDS PE=1 SV=1
56.89	76.4	128	P02647	APOA1_HUMAN	Apolipoprotein A-I OS=Homo sapiens GN=APOA1 PE=1 SV=1
66.63	66.9	123	P02790	HEMO_HUMAN	Hemopexin OS=Homo sapiens GN=HPX PE=1 SV=2
57.64	52.8	114	P10909	CLUS_HUMAN	Clusterin OS=Homo sapiens GN=CLU PE=1 SV=1
37.72	93.9	114	D9YZU5	D9YZU5_HUMAN	Hemoglobin, beta OS=Homo sapiens GN=HBB PE=2 SV=1
0.29	54.5	114	A8K008	A8K008_HUMAN	cDNA FLJ78387 OS=Homo sapiens PE=2 SV=1
47.16	66.9	109	P02649	APOE_HUMAN	Apolipoprotein E OS=Homo sapiens GN=APOE PE=1 SV=1
45.31	51.9	108	Q6N096	Q6N096_HUMAN	Putative uncharacterized protein DKFZp686I15196 OS=Homo sapiens GN=DKFZp686I15196 PE=2 SV=1
47.92	52.4	98	Q86U78	Q86U78_HUMAN	Angiotensinogen (Serine (Or cysteine) proteinase inhibitor, clade A (Alpha-1 antiproteinase, antitrypsin), member 8) OS=Homo sapiens PE=2 SV=1
99.55	63.4	87	A5PL27	A5PL27_HUMAN	CP protein OS=Homo sapiens GN=CP PE=2 SV=1
57.79	53	84	Q8N4S1	Q8N4S1_HUMAN	Proliferation-inducing protein 33 OS=Homo sapiens GN=SPARCL1 PE=2 SV=1
25.88	54.1	84	Q8N5F4	Q8N5F4_HUMAN	IGL@ protein OS=Homo sapiens GN=IGL@ PE=1 SV=1
0.14	54.2	83	Q6GMX4	Q6GMX4_HUMAN	IGL@ protein OS=Homo sapiens GN=IGL@ PE=1 SV=1
2	53	82	Q14515	SPRL1_HUMAN	SPARC-like protein 1 OS=Homo sapiens GN=SPARCL1 PE=1 SV=2
4.28	40.2	82	Q6NS95	Q6NS95_HUMAN	IGL@ protein OS=Homo sapiens GN=IGL@ PE=2 SV=1
31.13	67.1	81	P01034	CYTC_HUMAN	Cystatin-C OS=Homo sapiens GN=CST3 PE=1 SV=1
56.92	60.1	81	D6RF35	D6RF35_HUMAN	Vitamin D-binding protein OS=Homo sapiens GN=GC PE=2 SV=1
50.31	58	79	G3V5I3	G3V5I3_HUMAN	Alpha-1-antichymotrypsin OS=Homo sapiens GN=SERPINA3 PE=2 SV=1
57.36	66	77	P00738	HPT_HUMAN	Haptoglobin OS=Homo sapiens GN=HP PE=1 SV=1
108.5	37.2	73	P0C0L4	CO4A_HUMAN	Complement C4-A OS=Homo sapiens GN=C4A PE=1 SV=2
29.82	47.8	71	P02763	A1AG1_HUMAN	Alpha-1-acid glycoprotein 1 OS=Homo sapiens GN=ORM1 PE=1 SV=1
10.91	91.2	69	A0N071	A0N071_HUMAN	Delta globin OS=Homo sapiens GN=HBD PE=2 SV=1
39.43	47.4	65	P36955	PEDF_HUMAN	Pigment epithelium-derived factor OS=Homo sapiens GN=SERPINF1 PE=1 SV=4
2	47.5	65	Q6GMX0	Q6GMX0_HUMAN	Uncharacterized protein OS=Homo sapiens PE=2 SV=1
51.63	47.3	64	P06396	GELS_HUMAN	Gelsolin OS=Homo sapiens GN=GSN PE=1 SV=1
18.73	67	62	P02652	APOA2_HUMAN	Apolipoprotein A-II OS=Homo sapiens GN=APOA2 PE=1 SV=1
89.56	30.9	61	P02751	FINC_HUMAN	Fibronectin OS=Homo sapiens GN=FN1 PE=1 SV=4
2	32.3	61	B7ZLE5	B7ZLE5_HUMAN	FN1 protein OS=Homo sapiens GN=FN1 PE=2 SV=1
76.17	52.6	60	E7EUF1	E7EUF1_HUMAN	Ectonucleotide pyrophosphatase/phosphodiesterase family member 2 OS=Homo sapiens GN=ENPP2 PE=2 SV=1
48.46	44.3	60	P05060	SCG1_HUMAN	Secretogranin-1 OS=Homo sapiens GN=CHGB PE=1 SV=2
43.31	47.6	59	P01008	ANT3_HUMAN	Antithrombin-III OS=Homo sapiens GN=SERPINC1 PE=1 SV=1
36.79	41.2	58	E9KL26	E9KL26_HUMAN	Epididymis tissue protein Li 173 OS=Homo sapiens PE=2 SV=1
45.44	56.9	56	Q96K68	Q96K68_HUMAN	cDNA FLJ14473 fis, clone MAMMA1001080, highly similar to Homo sapiens SNC73 protein (SNC73) mRNA OS=Homo sapiens PE=2 SV=1
0.16	44.4	56	Q5FWF9	Q5FWF9_HUMAN	IGL@ protein OS=Homo sapiens GN=IGL@ PE=2 SV=1
4	89.1	55	Q4TZM4	Q4TZM4_HUMAN	Hemoglobin beta chain (Fragment) OS=Homo sapiens GN=HBB PE=3 SV=1
20.21	50.7	55	P02765	FETUA_HUMAN	Alpha-2-HS-glycoprotein OS=Homo sapiens GN=AHSG PE=1 SV=1
4	45.2	53	B4DEA7	B4DEA7_HUMAN	cDNA FLJ58131, highly similar to Secretogranin-1 OS=Homo sapiens PE=2 SV=1
14.01	47.8	52	P19652	A1AG2_HUMAN	Alpha-1-acid glycoprotein 2 OS=Homo sapiens GN=ORM2 PE=1 SV=2
2.06	85.9	52	I1VZV6	I1VZV6_HUMAN	Hemoglobin alpha 1 OS=Homo sapiens GN=HBA1 PE=3 SV=1
70.17	34	51	B4E1Z4	B4E1Z4_HUMAN	Complement factor B OS=Homo sapiens GN=CFB PE=2 SV=1
32.64	40.8	51	P51693	APLP1_HUMAN	Amyloid-like protein 1 OS=Homo sapiens GN=APLP1 PE=1 SV=3
2	62.2	49	B7Z1F8	B7Z1F8_HUMAN	cDNA FLJ53025, highly similar to Complement C4-B OS=Homo sapiens PE=2 SV=1
26.98	58	47	Q9UBP4	DKK3_HUMAN	Dickkopf-related protein 3 OS=Homo sapiens GN=DKK3 PE=1 SV=2
2	44	45	P08603	CFAH_HUMAN	Complement factor H OS=Homo sapiens GN=CFH PE=1 SV=4
71.79	44	45	A8K5T0	A8K5T0_HUMAN	cDNA FLJ75416, highly similar to Homo sapiens complement factor H (CFH), mRNA OS=Homo sapiens PE=2 SV=1
51.81	33.3	45	Q92823	NRCAM_HUMAN	Neuronal cell adhesion molecule OS=Homo sapiens GN=NRCAM PE=1 SV=3
37.63	58.8	44	P04217	A1BG_HUMAN	Alpha-1B-glycoprotein OS=Homo sapiens GN=A1BG PE=1 SV=4
4	54.6	44	Q6PQ81	Q6PQ81_HUMAN	Putative tumor suppressor Dkk-3/REIC OS=Homo sapiens GN=DKK3 PE=2 SV=1
10.73	61.5	43	F5H6I0	F5H6I0_HUMAN	Beta-2-microglobulin form pI 5.3 OS=Homo sapiens GN=B2M PE=2 SV=1
2	31.2	43	Q569I7	Q569I7_HUMAN	Uncharacterized protein OS=Homo sapiens PE=2 SV=1
57.8	40.7	42	B3KX75	B3KX75_HUMAN	cDNA FLJ44930 fis, clone BRAMY3015549, highly similar to Neural cell adhesion molecule L1-like protein (Fragment) OS=Homo sapiens PE=2 SV=1
40.82	62.7	42	A8K1K1	A8K1K1_HUMAN	cDNA FLJ76342, highly similar to Homo sapiens carnosine dipeptidase 1 (metallopeptidase M20 family)(CNDP1), mRNA OS=Homo sapiens PE=2 SV=1
35.66	37.1	41	P05067	A4_HUMAN	Amyloid beta A4 protein OS=Homo sapiens GN=APP PE=1 SV=3
39.91	60.4	40	P06727	APOA4_HUMAN	Apolipoprotein A-IV OS=Homo sapiens GN=APOA4 PE=1 SV=3
4	65.1	40	A0M8Q6	LAC7_HUMAN	Ig lambda-7 chain C region OS=Homo sapiens GN=IGLC7 PE=1 SV=2
18.62	39.5	39	C9JF17	C9JF17_HUMAN	Apolipoprotein D (Fragment) OS=Homo sapiens GN=APOD PE=2 SV=1
1.77	47.1	39	Q9NPP6	Q9NPP6_HUMAN	Immunoglobulin heavy chain variant (Fragment) OS=Homo sapiens PE=2 SV=1
43.81	34.9	35	O94985-2	CSTN1_HUMAN	Isoform 2 of Calsyntenin-1 OS=Homo sapiens GN=CLSTN1
28.4	49.7	34	P10645	CMGA_HUMAN	Chromogranin-A OS=Homo sapiens GN=CHGA PE=1 SV=7
48.75	35.3	34	Q12860	CNTN1_HUMAN	Contactin-1 OS=Homo sapiens GN=CNTN1 PE=1 SV=1
16.39	36.3	34	F2YQ21	F2YQ21_HUMAN	Osteopontin-D OS=Homo sapiens PE=2 SV=1
37.6	32.5	33	B7ZKJ8	B7ZKJ8_HUMAN	35 kDa inter-alpha-trypsin inhibitor heavy chain H4 OS=Homo sapiens GN=ITIH4 PE=2 SV=1
8.28	43.3	33	Q7Z379	Q7Z379_HUMAN	Putative uncharacterized protein DKFZp686K04218 (Fragment) OS=Homo sapiens GN=DKFZp686K04218 PE=1 SV=1
49.2	37.2	33	F5H1A8	F5H1A8_HUMAN	Gelsolin OS=Homo sapiens GN=GSN PE=2 SV=1
26.6	42.6	31	P25311	ZA2G_HUMAN	Zinc-alpha-2-glycoprotein OS=Homo sapiens GN=AZGP1 PE=1 SV=2
15.57	60.4	30	P00441	SODC_HUMAN	Superoxide dismutase [Cu-Zn] OS=Homo sapiens GN=SOD1 PE=1 SV=2
49.19	47.8	30	P00734	THRB_HUMAN	Prothrombin OS=Homo sapiens GN=F2 PE=1 SV=2
37.25	29	30	P13591	NCAM1_HUMAN	Neural cell adhesion molecule 1 OS=Homo sapiens GN=NCAM1 PE=1 SV=3
4.17	51.7	30	Q8NEJ1	Q8NEJ1_HUMAN	Uncharacterized protein OS=Homo sapiens PE=2 SV=1
47.44	33.4	29	A8K5A4	A8K5A4_HUMAN	cDNA FLJ76826, highly similar to Homo sapiens ceruloplasmin (ferroxidase) (CP), mRNA OS=Homo sapiens PE=2 SV=1
26.09	55.2	28	D9IWP9	D9IWP9_HUMAN	Beta-2-glycoprotein I (Fragment) OS=Homo sapiens PE=2 SV=1
30.52	35	28	P23142	FBLN1_HUMAN	Fibulin-1 OS=Homo sapiens GN=FBLN1 PE=1 SV=4
20.37	69.7	27	Q92876	KLK6_HUMAN	Kallikrein-6 OS=Homo sapiens GN=KLK6 PE=1 SV=1
43.14	42.4	27	P00747	PLMN_HUMAN	Plasminogen OS=Homo sapiens GN=PLG PE=1 SV=2
26.71	41.4	27	Q5UGI6	Q5UGI6_HUMAN	Serine/cysteine proteinase inhibitor clade G member 1 splice variant 2 (Fragment) OS=Homo sapiens GN=SERPING1 PE=2 SV=1
2	25.3	26	Q6N041	Q6N041_HUMAN	Putative uncharacterized protein DKFZp686O16217 (Fragment) OS=Homo sapiens GN=DKFZp686O16217 PE=2 SV=1
0.25	40.3	26	F5GZ08	F5GZ08_HUMAN	Amyloid-like protein 1 OS=Homo sapiens GN=APLP1 PE=2 SV=1
38.3	41.9	25	Q8WXD2	SCG3_HUMAN	Secretogranin-3 OS=Homo sapiens GN=SCG3 PE=1 SV=3
8.45	32.5	25	B4DUV1	B4DUV1_HUMAN	cDNA FLJ53207, highly similar to Homo sapiens fibulin 1 (FBLN1), transcript variant C, mRNA OS=Homo sapiens PE=2 SV=1
30.46	42.3	24	B2R8I2	B2R8I2_HUMAN	cDNA, FLJ93914, highly similar to Homo sapiens histidine-rich glycoprotein (HRG), mRNA OS=Homo sapiens PE=2 SV=1
16	39.7	24	Q16270	IBP7_HUMAN	Insulin-like growth factor-binding protein 7 OS=Homo sapiens GN=IGFBP7 PE=1 SV=1
2	30.8	24	P00739	HPTR_HUMAN	Haptoglobin-related protein OS=Homo sapiens GN=HPR PE=1 SV=2
21.16	55.4	24	Q6GMW4	Q6GMW4_HUMAN	IGL@ protein OS=Homo sapiens GN=IGL@ PE=2 SV=1
2	43.3	23	D3DNU8	D3DNU8_HUMAN	Kininogen 1, isoform CRA_a OS=Homo sapiens GN=KNG1 PE=4 SV=1
35.07	38.6	23	P02774	VTDB_HUMAN	Vitamin D-binding protein OS=Homo sapiens GN=GC PE=1 SV=1
20.93	31.6	22	P08697	A2AP_HUMAN	Alpha-2-antiplasmin OS=Homo sapiens GN=SERPINF2 PE=1 SV=3
22.81	35.7	22	B4DI63	B4DI63_HUMAN	cDNA FLJ59205, highly similar to Mimecan OS=Homo sapiens PE=2 SV=1
30.57	29.5	22	B4E1C2	B4E1C2_HUMAN	Kininogen 1, isoform CRA_b OS=Homo sapiens GN=KNG1 PE=2 SV=1
34.1	34.7	21	P43652	AFAM_HUMAN	Afamin OS=Homo sapiens GN=AFM PE=1 SV=1
24.36	42.4	20	O15240	VGF_HUMAN	Neurosecretory protein VGF OS=Homo sapiens GN=VGF PE=1 SV=2
6	28.2	20	P07998	RNAS1_HUMAN	Ribonuclease pancreatic OS=Homo sapiens GN=RNASE1 PE=1 SV=4
25.99	24	20	B7Z625	B7Z625_HUMAN	cDNA FLJ55521, highly similar to Protein kinase C-binding protein NELL2 OS=Homo sapiens PE=2 SV=1
34.99	33.5	20	P10643	CO7_HUMAN	Complement component C7 OS=Homo sapiens GN=C7 PE=1 SV=2
1.49	33.3	19	B2R6W1	B2R6W1_HUMAN	cDNA, FLJ93143, highly similar to Homo sapiens complement component 7 (C7), mRNA OS=Homo sapiens PE=2 SV=1
18.03	26.4	19	D9ZGG2	D9ZGG2_HUMAN	Vitronectin OS=Homo sapiens GN=VTN PE=2 SV=1
25.4	21.9	19	Q5T985	Q5T985_HUMAN	Inter-alpha-trypsin inhibitor heavy chain H2 OS=Homo sapiens GN=ITIH2 PE=2 SV=1
4.3	44.4	19	P01602	KV110_HUMAN	Ig kappa chain V-I region HK102 (Fragment) OS=Homo sapiens GN=IGKV1-5 PE=4 SV=1
22.13	46	19	O43505	B3GN1_HUMAN	N-acetyllactosaminide beta-1,3-N-acetylglucosaminyltransferase OS=Homo sapiens GN=B3GNT1 PE=1 SV=1
8.28	7	18	P02452	CO1A1_HUMAN	Collagen alpha-1(I) chain OS=Homo sapiens GN=COL1A1 PE=1 SV=5
18.04	40.3	18	A8K050	A8K050_HUMAN	cDNA FLJ75376, highly similar to Homo sapiens peptidoglycan recognition protein L (PGLYRP) mRNA OS=Homo sapiens PE=2 SV=1
11.27	50.9	18	Q9UL77	Q9UL77_HUMAN	Myosin-reactive immunoglobulin light chain variable region (Fragment) OS=Homo sapiens PE=1 SV=1
20.83	26.2	18	A8K3E4	A8K3E4_HUMAN	cDNA FLJ78367, highly similar to Homo sapiens fibrinogen, A alpha polypeptide (FGA), transcriptvariant alpha, mRNA OS=Homo sapiens PE=2 SV=1
33.8	5.4	18	C0JYY2	C0JYY2_HUMAN	Apolipoprotein B (Including Ag(X) antigen) OS=Homo sapiens GN=APOB PE=4 SV=1
25.55	33.5	18	B7Z549	B7Z549_HUMAN	cDNA FLJ56821, highly similar to Inter-alpha-trypsin inhibitor heavy chain H1 OS=Homo sapiens PE=2 SV=1
21.79	38.2	18	P51884	LUM_HUMAN	Lumican OS=Homo sapiens GN=LUM PE=1 SV=2
30.86	23.3	18	A1L3A3	A1L3A3_HUMAN	Contactin 2 (Axonal) OS=Homo sapiens GN=CNTN2 PE=2 SV=1
20.95	44.2	18	F6SYF8	F6SYF8_HUMAN	Dickkopf-related protein 3 OS=Homo sapiens GN=DKK3 PE=2 SV=1
22.21	29.4	17	B3KNX0	B3KNX0_HUMAN	cDNA FLJ30621 fis, clone CTONG2001681, highly similar to Complement C1s subcomponent (EC 3.4.21.42) OS=Homo sapiens PE=2 SV=1
17.42	33	17	O95502	NPTXR_HUMAN	Neuronal pentraxin receptor OS=Homo sapiens GN=NPTXR PE=2 SV=2
22.55	40.7	17	Q32Q65	Q32Q65_HUMAN	Fibrinogen beta chain OS=Homo sapiens GN=FGB PE=2 SV=1
19.07	29.1	17	C9JV77	C9JV77_HUMAN	Alpha-2-HS-glycoprotein OS=Homo sapiens GN=AHSG PE=2 SV=1
24.76	29.2	16	P13521	SCG2_HUMAN	Secretogranin-2 OS=Homo sapiens GN=SCG2 PE=1 SV=2
20.2	36.4	16	P07339	CATD_HUMAN	Cathepsin D OS=Homo sapiens GN=CTSD PE=1 SV=1
22.76	38.4	16	F1C4A7	F1C4A7_HUMAN	Monocyte differentiation antigen CD14 OS=Homo sapiens GN=CD14 PE=3 SV=1
18	38.3	16	Q68CK4	Q68CK4_HUMAN	Leucine-rich alpha-2-glycoprotein OS=Homo sapiens GN=HMFT1766 PE=2 SV=1
24.1	43.5	16	P16870	CBPE_HUMAN	Carboxypeptidase E OS=Homo sapiens GN=CPE PE=1 SV=1
24.34	30.3	16	Q8IVC0	Q8IVC0_HUMAN	Serpin peptidase inhibitor, clade D (Heparin cofactor), member 1 OS=Homo sapiens GN=SERPIND1 PE=2 SV=1
25.6	30.3	16	B4DPQ0	B4DPQ0_HUMAN	cDNA FLJ54471, highly similar to Complement C1r subcomponent (EC 3.4.21.41) OS=Homo sapiens PE=2 SV=1
22.85	36.7	15	P01871	IGHM_HUMAN	Ig mu chain C region OS=Homo sapiens GN=IGHM PE=1 SV=3
24.87	10.6	15	Q9Y4C0	NRX3A_HUMAN	Neurexin-3 OS=Homo sapiens GN=NRXN3 PE=1 SV=4
24.4	16	15	Q9UIU0	Q9UIU0_HUMAN	Dihydropyridine receptor alpha 2 subunit OS=Homo sapiens GN=CACNA2D1 PE=4 SV=1
26.42	37.5	15	B2R815	B2R815_HUMAN	cDNA, FLJ93695, highly similar to Homo sapiens serpin peptidase inhibitor, clade A (alpha-1 antiproteinase, antitrypsin), member 4 (SERPINA4), mRNA OS=Homo sapiens PE=2 SV=1
12.23	54.2	15	P08294	SODE_HUMAN	Extracellular superoxide dismutase [Cu-Zn] OS=Homo sapiens GN=SOD3 PE=1 SV=2
25.41	16.8	15	P12109	CO6A1_HUMAN	Collagen alpha-1(VI) chain OS=Homo sapiens GN=COL6A1 PE=1 SV=3
27.26	29.8	15	B4DVE1	B4DVE1_HUMAN	cDNA FLJ53478, highly similar to Galectin-3-binding protein OS=Homo sapiens PE=2 SV=1
2	28.5	15	H6VRG1	H6VRG1_HUMAN	Keratin 1 OS=Homo sapiens GN=KRT1 PE=2 SV=1
14.02	66.7	15	D3GKD8	D3GKD8_HUMAN	A-gamma globin Osilo variant OS=Homo sapiens GN=HBG1 PE=3 SV=1
22.31	31	14	P02748	CO9_HUMAN	Complement component C9 OS=Homo sapiens GN=C9 PE=1 SV=2
19.24	15.9	14	Q14118	DAG1_HUMAN	Dystroglycan OS=Homo sapiens GN=DAG1 PE=1 SV=2
8	41.3	14	Q0ZCH9	Q0ZCH9_HUMAN	Immunglobulin heavy chain variable region (Fragment) OS=Homo sapiens PE=4 SV=1
22.6	18.3	14	P19021	AMD_HUMAN	Peptidyl-glycine alpha-amidating monooxygenase OS=Homo sapiens GN=PAM PE=1 SV=2
26.02	4.4	14	P98160	PGBM_HUMAN	Basement membrane-specific heparan sulfate proteoglycan core protein OS=Homo sapiens GN=HSPG2 PE=1 SV=4
8	26.3	14	B4DQI1	B4DQI1_HUMAN	Complement C2b fragment OS=Homo sapiens GN=C2 PE=2 SV=1
2	44.9	14	B7Z556	B7Z556_HUMAN	cDNA FLJ56822, highly similar to Alpha-2-HS-glycoprotein OS=Homo sapiens PE=2 SV=1
20.88	28	14	A8KAJ3	A8KAJ3_HUMAN	cDNA FLJ77823, highly similar to Homo sapiens EGF-containing fibulin-like extracellular matrix protein 1, transcript variant 3, mRNA OS=Homo sapiens PE=2 SV=1
25.31	16.5	14	Q14CA1	Q14CA1_HUMAN	NRCAM protein OS=Homo sapiens GN=NRCAM PE=2 SV=1
10.01	19.5	13	B2R9F2	B2R9F2_HUMAN	cDNA, FLJ94361, highly similar to Homo sapiens serine (or cysteine) proteinase inhibitor, clade A(alpha-1 antiproteinase, antitrypsin), member 6 (SERPINA6), mRNA OS=Homo sapiens PE=2 SV=1
18.88	36.4	13	P02760	AMBP_HUMAN	Protein AMBP OS=Homo sapiens GN=AMBP PE=1 SV=1
21.21	12	13	Q92859	NEO1_HUMAN	Neogenin OS=Homo sapiens GN=NEO1 PE=1 SV=2
26.31	5.4	13	Q9Y6R7	FCGBP_HUMAN	IgGFc-binding protein OS=Homo sapiens GN=FCGBP PE=1 SV=3
24.97	36.9	13	C9JEU5	C9JEU5_HUMAN	Fibrinogen gamma chain OS=Homo sapiens GN=FGG PE=2 SV=1
20.82	27.1	13	G3XAM2	G3XAM2_HUMAN	Complement factor I light chain OS=Homo sapiens GN=CFI PE=2 SV=1
2	38.3	13	P02750	A2GL_HUMAN	Leucine-rich alpha-2-glycoprotein OS=Homo sapiens GN=LRG1 PE=1 SV=2
16.31	55.2	13	P00915	CAH1_HUMAN	Carbonic anhydrase 1 OS=Homo sapiens GN=CA1 PE=1 SV=2
8.09	30.3	13	F8VYK9	F8VYK9_HUMAN	Insulin-like growth factor-binding protein 6 OS=Homo sapiens GN=IGFBP6 PE=2 SV=1
16.14	20.2	13	A0PJJ4	A0PJJ4_HUMAN	LRRC4B protein (Fragment) OS=Homo sapiens GN=LRRC4B PE=2 SV=1
15.06	36	13	P10451-5	OSTP_HUMAN	Isoform 5 of Osteopontin OS=Homo sapiens GN=SPP1
19.01	37.5	13	B4DEN5	B4DEN5_HUMAN	cDNA FLJ54344, highly similar to N-acetyllactosaminidebeta-1,3-N-acetylglucosaminyltransferase (EC 2.4.1.149) OS=Homo sapiens PE=2 SV=1
24.02	21.8	12	O75326	SEM7A_HUMAN	Semaphorin-7A OS=Homo sapiens GN=SEMA7A PE=1 SV=1
15.97	20.6	12	Q9NSD0	Q9NSD0_HUMAN	Protein S OS=Homo sapiens PE=2 SV=1
23.6	30.5	12	A4D2D2	A4D2D2_HUMAN	Procollagen C-endopeptidase enhancer OS=Homo sapiens GN=PCOLCE PE=4 SV=1
16.95	67.3	12	Q5VY30	Q5VY30_HUMAN	Plasma retinol-binding protein(1-182) OS=Homo sapiens GN=RBP4 PE=2 SV=1
20	24.2	12	B3KUE5	B3KUE5_HUMAN	Phospholipid transfer protein OS=Homo sapiens GN=PLTP PE=2 SV=1
20.93	30.7	12	Q9NQ79	CRAC1_HUMAN	Cartilage acidic protein 1 OS=Homo sapiens GN=CRTAC1 PE=1 SV=2
16.24	15.3	12	P13671	CO6_HUMAN	Complement component C6 OS=Homo sapiens GN=C6 PE=1 SV=3
2	27.8	12	P01609	KV117_HUMAN	Ig kappa chain V-I region Scw OS=Homo sapiens PE=1 SV=1
14.01	40.6	12	B2R582	B2R582_HUMAN	cDNA, FLJ92374, highly similar to Homo sapiens C-type lectin domain family 3, member B (CLEC3B), mRNA OS=Homo sapiens PE=2 SV=1
15.27	19.3	12	Q53GU8	Q53GU8_HUMAN	Transforming growth factor, beta-induced, 68kDa variant (Fragment) OS=Homo sapiens PE=2 SV=1
20.83	4.7	11	J3KQ66	J3KQ66_HUMAN	Reelin OS=Homo sapiens GN=RELN PE=4 SV=1
8.18	21	11	Q86XR1	Q86XR1_HUMAN	Major prion protein (Fragment) OS=Homo sapiens GN=PRNP PE=2 SV=1
20.57	6.5	11	Q7Z7M0	MEGF8_HUMAN	Multiple epidermal growth factor-like domains protein 8 OS=Homo sapiens GN=MEGF8 PE=1 SV=2
20.87	22.9	11	O00391	QSOX1_HUMAN	Sulfhydryl oxidase 1 OS=Homo sapiens GN=QSOX1 PE=1 SV=3
2	14.5	11	Q96QS0	Q96QS0_HUMAN	Putative matrix cell adhesion molecule-3 OS=Homo sapiens PE=1 SV=1
4	32.5	11	P01743	HV102_HUMAN	Ig heavy chain V-I region HG3 OS=Homo sapiens PE=4 SV=1
12	41.2	11	A2KBC6	A2KBC6_HUMAN	Anti-FactorVIII scFv (Fragment) OS=Homo sapiens PE=2 SV=1
17.26	36.8	10	D3DQH8	D3DQH8_HUMAN	Secreted protein, acidic, cysteine-rich (Osteonectin), isoform CRA_a OS=Homo sapiens GN=SPARC PE=2 SV=1
16.21	31.9	10	P36222	CH3L1_HUMAN	Chitinase-3-like protein 1 OS=Homo sapiens GN=CHI3L1 PE=1 SV=2
14.58	15.7	10	Q59EN5	Q59EN5_HUMAN	Prosaposin variant (Fragment) OS=Homo sapiens PE=2 SV=1
15.61	18.7	10	Q16610	ECM1_HUMAN	Extracellular matrix protein 1 OS=Homo sapiens GN=ECM1 PE=1 SV=2
13.46	42.7	10	Q92520	FAM3C_HUMAN	Protein FAM3C OS=Homo sapiens GN=FAM3C PE=1 SV=1
18.47	6.2	10	P12259	FA5_HUMAN	Coagulation factor V OS=Homo sapiens GN=F5 PE=1 SV=4
14	21.9	10	P05543	THBG_HUMAN	Thyroxine-binding globulin OS=Homo sapiens GN=SERPINA7 PE=1 SV=2
15.3	26.8	10	Q53HP2	Q53HP2_HUMAN	Tripeptidyl-peptidase I variant (Fragment) OS=Homo sapiens PE=2 SV=1
14.83	7.5	10	P01031	CO5_HUMAN	Complement C5 OS=Homo sapiens GN=C5 PE=1 SV=4
2	6	10	Q59EG0	Q59EG0_HUMAN	Basement membrane-specific heparan sulfate proteoglycan core protein variant (Fragment) OS=Homo sapiens PE=2 SV=1
2	36.1	10	Q9Y509	Q9Y509_HUMAN	VH3 protein (Fragment) OS=Homo sapiens GN=VH3 PE=1 SV=1
14	21.4	10	P05154	IPSP_HUMAN	Plasma serine protease inhibitor OS=Homo sapiens GN=SERPINA5 PE=1 SV=3
2	20.5	10	P23083	HV103_HUMAN	Ig heavy chain V-I region V35 OS=Homo sapiens PE=1 SV=1
18.79	26.6	10	B4DRT3	B4DRT3_HUMAN	Pyruvate kinase OS=Homo sapiens PE=2 SV=1
14.53	8.8	10	E7ERL8	E7ERL8_HUMAN	Neurexin-1-beta OS=Homo sapiens GN=NRXN1 PE=2 SV=1
2	64.9	10	Q8TCZ8	Q8TCZ8_HUMAN	Apolipoprotein E (Fragment) OS=Homo sapiens GN=APOE PE=4 SV=1
20.77	16.1	10	B2R7F8	B2R7F8_HUMAN	cDNA, FLJ93426, highly similar to Homo sapiens plasminogen (PLG), mRNA OS=Homo sapiens PE=2 SV=1
16.08	39.6	9	Q9UHG2	PCSK1_HUMAN	ProSAAS OS=Homo sapiens GN=PCSK1N PE=1 SV=1
15.93	16.3	9	Q06481	APLP2_HUMAN	Amyloid-like protein 2 OS=Homo sapiens GN=APLP2 PE=1 SV=2
15.38	16.4	9	D3DSC5	D3DSC5_HUMAN	Neural cell adhesion molecule 2, isoform CRA_a (Fragment) OS=Homo sapiens GN=NCAM2 PE=2 SV=1
4	50.4	9	P04433	KV309_HUMAN	Ig kappa chain V-III region VG (Fragment) OS=Homo sapiens PE=1 SV=1
10.14	9.5	9	P08123	CO1A2_HUMAN	Collagen alpha-2(I) chain OS=Homo sapiens GN=COL1A2 PE=1 SV=7
11.61	4.8	9	C9JFM0	C9JFM0_HUMAN	Receptor-type tyrosine-protein phosphatase zeta OS=Homo sapiens GN=PTPRZ1 PE=2 SV=1
2	36.2	9	P01779	HV318_HUMAN	Ig heavy chain V-III region TUR OS=Homo sapiens PE=1 SV=1
17.33	50	9	K7ERG9	K7ERG9_HUMAN	Complement factor D OS=Homo sapiens GN=CFD PE=3 SV=1
8.01	22.7	9	D6R934	D6R934_HUMAN	Complement C1q subcomponent subunit B OS=Homo sapiens GN=C1QB PE=2 SV=1
0.06	12.2	9	A2J1M4	A2J1M4_HUMAN	Rheumatoid factor RF-ET7 (Fragment) OS=Homo sapiens PE=2 SV=1
8.2	5.6	8	G5E9G7	G5E9G7_HUMAN	Neurexin 2, isoform CRA_a OS=Homo sapiens GN=NRXN2 PE=2 SV=1
8.13	44.3	8	Q9UL90	Q9UL90_HUMAN	Myosin-reactive immunoglobulin heavy chain variable region (Fragment) OS=Homo sapiens PE=2 SV=1
10.08	22.3	8	H3BLU2	H3BLU2_HUMAN	Limbic system-associated membrane protein (Fragment) OS=Homo sapiens GN=LSAMP PE=2 SV=1
14.1	24.8	8	Q15818	NPTX1_HUMAN	Neuronal pentraxin-1 OS=Homo sapiens GN=NPTX1 PE=2 SV=2
10.74	28.6	8	Q3B7B1	Q3B7B1_HUMAN	PENK protein (Fragment) OS=Homo sapiens GN=PENK PE=2 SV=1
7.74	43.7	8	Q53HV6	Q53HV6_HUMAN	Niemann-Pick disease, type C2 variant (Fragment) OS=Homo sapiens PE=2 SV=1
12.06	15.4	8	P35527	K1C9_HUMAN	Keratin, type I cytoskeletal 9 OS=Homo sapiens GN=KRT9 PE=1 SV=3
14.24	16.2	8	P08253	MMP2_HUMAN	72 kDa type IV collagenase OS=Homo sapiens GN=MMP2 PE=1 SV=2
0.13	36.8	8	A2MYD5	A2MYD5_HUMAN	V2-6 protein (Fragment) OS=Homo sapiens GN=V2-6 PE=4 SV=1
14.17	40.9	8	P60174	TPIS_HUMAN	Triosephosphate isomerase OS=Homo sapiens GN=TPI1 PE=1 SV=3
14	17.6	8	B7ZA94	B7ZA94_HUMAN	cDNA, FLJ79108, highly similar to Complement component C8 beta chain OS=Homo sapiens PE=2 SV=1
12.29	11.2	8	B1AHL2	B1AHL2_HUMAN	Fibulin-1 OS=Homo sapiens GN=FBLN1 PE=2 SV=1
7.16	8.3	7	B7Z9B1	B7Z9B1_HUMAN	cDNA FLJ52398, highly similar to Cadherin-13 OS=Homo sapiens PE=2 SV=1
12.6	3.5	7	E9PCV6	E9PCV6_HUMAN	Collagen alpha-3(VI) chain OS=Homo sapiens GN=COL6A3 PE=2 SV=1
14	56.2	7	D9IAI1	D9IAI1_HUMAN	Phosphatidylethanolamine-binding protein 1 OS=Homo sapiens PE=2 SV=1
11.35	21.8	7	D3DVW9	D3DVW9_HUMAN	Protein tyrosine phosphatase, non-receptor type substrate 1, isoform CRA_a OS=Homo sapiens GN=PTPNS1 PE=4 SV=1
14.57	19.3	7	Q53GX6	Q53GX6_HUMAN	Nucleobindin 1 variant (Fragment) OS=Homo sapiens PE=2 SV=1
7.02	30.8	7	Q6FHD0	Q6FHD0_HUMAN	SGNE1 protein (Fragment) OS=Homo sapiens GN=SGNE1 PE=2 SV=1
6.86	27.6	7	Q59GA0	Q59GA0_HUMAN	Thy-1 cell surface antigen variant (Fragment) OS=Homo sapiens PE=2 SV=1
10.13	40.9	7	P17900	SAP3_HUMAN	Ganglioside GM2 activator OS=Homo sapiens GN=GM2A PE=1 SV=4
10.26	31.7	7	P18065	IBP2_HUMAN	Insulin-like growth factor-binding protein 2 OS=Homo sapiens GN=IGFBP2 PE=1 SV=2
10.48	13.7	7	P13645	K1C10_HUMAN	Keratin, type I cytoskeletal 10 OS=Homo sapiens GN=KRT10 PE=1 SV=6
12.06	17.2	7	J3KQ60	J3KQ60_HUMAN	Inter-alpha-trypsin inhibitor heavy chain H5 OS=Homo sapiens GN=ITIH5 PE=4 SV=1
11.16	18.4	7	Q13228	SBP1_HUMAN	Selenium-binding protein 1 OS=Homo sapiens GN=SELENBP1 PE=1 SV=2
12.83	17.5	7	Q8TAY0	Q8TAY0_HUMAN	Insulin-like growth factor binding protein, acid labile subunit OS=Homo sapiens GN=IGFALS PE=2 SV=1
2.86	42.2	7	P01781	HV320_HUMAN	Ig heavy chain V-III region GAL OS=Homo sapiens PE=1 SV=1
12.25	16.4	7	F8W1Q3	F8W1Q3_HUMAN	Biotinidase OS=Homo sapiens GN=BTD PE=2 SV=1
13.05	8.8	7	P49641	MA2A2_HUMAN	Alpha-mannosidase 2x OS=Homo sapiens GN=MAN2A2 PE=2 SV=3
2.17	46.8	7	P01623	KV305_HUMAN	Ig kappa chain V-III region WOL OS=Homo sapiens PE=1 SV=1
11.31	23.2	7	A8MVZ9	A8MVZ9_HUMAN	Fructose-bisphosphate aldolase OS=Homo sapiens GN=ALDOC PE=2 SV=1
8.83	16.4	7	B3KXD3	B3KXD3_HUMAN	cDNA FLJ45230 fis, clone BRCAN2021325, highly similar to Carboxypeptidase E (EC 3.4.17.10) OS=Homo sapiens PE=2 SV=1
9.26	13.6	7	P05546	HEP2_HUMAN	Heparin cofactor 2 OS=Homo sapiens GN=SERPIND1 PE=1 SV=3
9.59	9.7	7	P02671	FIBA_HUMAN	Fibrinogen alpha chain OS=Homo sapiens GN=FGA PE=1 SV=2
10	13	6	Q6UXB8	PI16_HUMAN	Peptidase inhibitor 16 OS=Homo sapiens GN=PI16 PE=1 SV=1
11.82	16.4	6	P04180	LCAT_HUMAN	Phosphatidylcholine-sterol acyltransferase OS=Homo sapiens GN=LCAT PE=1 SV=1
6.25	22	6	Q7Z3B1	NEGR1_HUMAN	Neuronal growth regulator 1 OS=Homo sapiens GN=NEGR1 PE=1 SV=3
11.29	8.3	6	P19022	CADH2_HUMAN	Cadherin-2 OS=Homo sapiens GN=CDH2 PE=1 SV=4
10.02	15	6	Q9H0C7	Q9H0C7_HUMAN	Putative uncharacterized protein DKFZp434B0535 OS=Homo sapiens GN=DKFZp434B0535 PE=2 SV=1
12.03	15.5	6	B3KNN9	B3KNN9_HUMAN	cDNA FLJ30070 fis, clone ASTRO2000046, highly similar to CD166 ANTIGEN OS=Homo sapiens PE=2 SV=1
8	40.8	6	O60888	CUTA_HUMAN	Protein CutA OS=Homo sapiens GN=CUTA PE=1 SV=2
2	26.6	6	P01612	KV120_HUMAN	Ig kappa chain V-I region Mev OS=Homo sapiens PE=1 SV=1
0.2	42.1	6	A2JA16	A2JA16_HUMAN	Anti-mucin1 light chain variable region (Fragment) OS=Homo sapiens PE=2 SV=1
7.85	3.8	6	G3XAI2	G3XAI2_HUMAN	Laminin subunit beta-1 OS=Homo sapiens GN=LAMB1 PE=2 SV=1
2.03	29.2	6	P35542	SAA4_HUMAN	Serum amyloid A-4 protein OS=Homo sapiens GN=SAA4 PE=1 SV=2
8	7	6	Q53EL9	SEZ6_HUMAN	Seizure protein 6 homolog OS=Homo sapiens GN=SEZ6 PE=1 SV=2
2	30.7	6	A2JA14	A2JA14_HUMAN	Anti-mucin1 heavy chain variable region (Fragment) OS=Homo sapiens PE=2 SV=1
8.79	25.1	6	B4DF70	B4DF70_HUMAN	cDNA FLJ60461, highly similar to Peroxiredoxin-2 (EC 1.11.1.15) OS=Homo sapiens PE=2 SV=1
11.39	20.4	6	Q8NFZ8	CADM4_HUMAN	Cell adhesion molecule 4 OS=Homo sapiens GN=CADM4 PE=1 SV=1
12	16.8	6	Q8IZZ5	Q8IZZ5_HUMAN	Coagulation factor XII-Mie OS=Homo sapiens PE=2 SV=1
4.77	10.6	6	H7C215	H7C215_HUMAN	Reticulon-4 receptor (Fragment) OS=Homo sapiens GN=RTN4R PE=4 SV=1
10.61	23.2	6	Q2TU84	Q2TU84_HUMAN	Aspartate aminotransferase OS=Homo sapiens GN=GIG18 PE=2 SV=1
4.14	14.3	6	D3DQB3	D3DQB3_HUMAN	Sparc/osteonectin, cwcv and kazal-like domains proteoglycan (Testican) 1, isoform CRA_a OS=Homo sapiens GN=SPOCK1 PE=2 SV=1
8.03	14.4	6	Q9UHL4	DPP2_HUMAN	Dipeptidyl peptidase 2 OS=Homo sapiens GN=DPP7 PE=1 SV=3
10.15	15.8	6	O94919	ENDD1_HUMAN	Endonuclease domain-containing 1 protein OS=Homo sapiens GN=ENDOD1 PE=1 SV=2
9.68	7.9	6	F8VVB6	F8VVB6_HUMAN	Protein kinase C-binding protein NELL2 OS=Homo sapiens GN=NELL2 PE=2 SV=1
7.1	67.7	6	L8B4J3	L8B4J3_HUMAN	Ubiquitin C OS=Homo sapiens GN=UbC PE=4 SV=1
10	6.2	5	B7Z5L4	B7Z5L4_HUMAN	cDNA FLJ61340, highly similar to Homo sapiens seizure related 6 homolog-like 2 (SEZ6L2), transcript variant 2, mRNA OS=Homo sapiens PE=2 SV=1
10	22.5	5	B7Z9J9	B7Z9J9_HUMAN	cDNA, FLJ78863, highly similar to Neurotrimin OS=Homo sapiens PE=2 SV=1
4	28.1	5	Q6FHM9	Q6FHM9_HUMAN	CD59 antigen, complement regulatory protein, isoform CRA_b OS=Homo sapiens GN=CD59 PE=2 SV=1
6.89	30.5	5	P16035	TIMP2_HUMAN	Metalloproteinase inhibitor 2 OS=Homo sapiens GN=TIMP2 PE=1 SV=2
9.87	22	5	Q8WVW5	Q8WVW5_HUMAN	Putative uncharacterized protein (Fragment) OS=Homo sapiens PE=2 SV=1
8.55	40.1	5	Q6FGX5	Q6FGX5_HUMAN	TIMP metallopeptidase inhibitor 1, isoform CRA_a OS=Homo sapiens GN=TIMP1 PE=2 SV=1
8.21	19.5	5	P22352	GPX3_HUMAN	Glutathione peroxidase 3 OS=Homo sapiens GN=GPX3 PE=1 SV=2
8.49	11	5	A8K144	A8K144_HUMAN	cDNA FLJ76746, highly similar to Homo sapiens brevican (BCAN), transcript variant 1, mRNA OS=Homo sapiens PE=2 SV=1
8.05	7.4	5	Q24JP5	T132A_HUMAN	Transmembrane protein 132A OS=Homo sapiens GN=TMEM132A PE=2 SV=1
3.56	1.3	5	Q59FG9	Q59FG9_HUMAN	Chondroitin sulfate proteoglycan 2 (Versican) variant (Fragment) OS=Homo sapiens PE=2 SV=1
2.07	48.6	5	A2JA19	A2JA19_HUMAN	Anti-mucin1 light chain variable region (Fragment) OS=Homo sapiens PE=2 SV=1
8.46	14.9	5	B5MBX2	B5MBX2_HUMAN	Transcobalamin-2 OS=Homo sapiens GN=TCN2 PE=2 SV=1
6	7.8	5	P09603	CSF1_HUMAN	Macrophage colony-stimulating factor 1 OS=Homo sapiens GN=CSF1 PE=1 SV=2
2.04	26.1	5	P01767	HV306_HUMAN	Ig heavy chain V-III region BUT OS=Homo sapiens PE=1 SV=1
6.24	35.4	5	H0YN67	H0YN67_HUMAN	Immunoglobulin superfamily-containing leucine-rich repeat protein (Fragment) OS=Homo sapiens GN=ISLR PE=2 SV=1
9.7	12.8	5	P07357	CO8A_HUMAN	Complement component C8 alpha chain OS=Homo sapiens GN=C8A PE=1 SV=2
8	21.3	5	C9J8Z4	C9J8Z4_HUMAN	Immunoglobulin superfamily member 8 (Fragment) OS=Homo sapiens GN=IGSF8 PE=2 SV=1
8.42	4.4	5	J3QSX2	J3QSX2_HUMAN	Neurofascin OS=Homo sapiens GN=NFASC PE=4 SV=1
10.02	17.3	5	Q6FHG6	Q6FHG6_HUMAN	PRELP protein (Fragment) OS=Homo sapiens GN=PRELP PE=2 SV=1
0.11	23.4	5	A2J1N5	A2J1N5_HUMAN	Rheumatoid factor RF-ET6 (Fragment) OS=Homo sapiens PE=2 SV=1
10.04	23.1	5	P27169	PON1_HUMAN	Serum paraoxonase/arylesterase 1 OS=Homo sapiens GN=PON1 PE=1 SV=3
10.12	27.6	5	D6RHI9	D6RHI9_HUMAN	Ribonuclease T2 (Fragment) OS=Homo sapiens GN=RNASET2 PE=2 SV=1
10.01	3.3	5	O00468-6	AGRIN_HUMAN	Isoform 6 of Agrin OS=Homo sapiens GN=AGRN
8.02	1.2	5	Q07954	LRP1_HUMAN	Prolow-density lipoprotein receptor-related protein 1 OS=Homo sapiens GN=LRP1 PE=1 SV=2
8.87	9.6	5	Q58F15	Q58F15_HUMAN	EPHA4 protein OS=Homo sapiens GN=EPHA4 PE=2 SV=1
7.47	4.8	5	G8JL96	G8JL96_HUMAN	Receptor-type tyrosine-protein phosphatase S OS=Homo sapiens GN=PTPRS PE=2 SV=1
10.01	4.5	5	Q7Z3Z9	Q7Z3Z9_HUMAN	L1 cell adhesion molecule (Fragment) OS=Homo sapiens GN=L1CAM PE=2 SV=1
6	36.8	5	P01625	KV402_HUMAN	Ig kappa chain V-IV region Len OS=Homo sapiens PE=1 SV=2
5.04	1.8	5	P22105	TENX_HUMAN	Tenascin-X OS=Homo sapiens GN=TNXB PE=1 SV=3
3.13	31.9	5	A0N5G1	A0N5G1_HUMAN	Rheumatoid factor C6 light chain (Fragment) OS=Homo sapiens GN=V<kappa>1 PE=2 SV=1
7.16	19.6	5	P24592	IBP6_HUMAN	Insulin-like growth factor-binding protein 6 OS=Homo sapiens GN=IGFBP6 PE=1 SV=1
8.88	43.9	5	J3KMY5	J3KMY5_HUMAN	Epididymal secretory protein E1 OS=Homo sapiens GN=NPC2 PE=4 SV=1
5.8	13.3	5	Q53FV4	Q53FV4_HUMAN	Lumican variant (Fragment) OS=Homo sapiens PE=2 SV=1
3.19	15.5	5	G3V357	G3V357_HUMAN	Ribonuclease pancreatic OS=Homo sapiens GN=RNASE1 PE=2 SV=1
6.52	11.4	5	B7ZM33	B7ZM33_HUMAN	Peptidoglycan recognition protein 2 OS=Homo sapiens GN=PGLYRP2 PE=2 SV=1
5.89	8.5	4	B4E367	B4E367_HUMAN	cDNA FLJ61564, highly similar to Plexin domain-containing protein 2 OS=Homo sapiens PE=2 SV=1
6	11.3	4	Q8N126	CADM3_HUMAN	Cell adhesion molecule 3 OS=Homo sapiens GN=CADM3 PE=1 SV=1
8	28.7	4	P07360	CO8G_HUMAN	Complement component C8 gamma chain OS=Homo sapiens GN=C8G PE=1 SV=3
4.12	9.3	4	C9J6G4	C9J6G4_HUMAN	WAP, Kazal, immunoglobulin, Kunitz and NTR domain-containing protein 2 OS=Homo sapiens GN=WFIKKN2 PE=2 SV=1
8	27.3	4	Q96S96	PEBP4_HUMAN	Phosphatidylethanolamine-binding protein 4 OS=Homo sapiens GN=PEBP4 PE=1 SV=3
4.57	10.9	4	Q53HB8	Q53HB8_HUMAN	Oligodendrocyte myelin glycoprotein variant (Fragment) OS=Homo sapiens PE=2 SV=1
4.45	6.7	4	B2R642	B2R642_HUMAN	cDNA, FLJ92775, highly similar to Homo sapiens melanoma cell adhesion molecule (MCAM), mRNA OS=Homo sapiens PE=2 SV=1
7.7	4.7	4	Q4LE67	Q4LE67_HUMAN	CSPG3 variant protein (Fragment) OS=Homo sapiens GN=CSPG3 variant protein PE=2 SV=1
4.19	23.9	4	Q99969	RARR2_HUMAN	Retinoic acid receptor responder protein 2 OS=Homo sapiens GN=RARRES2 PE=1 SV=1
8	17.1	4	Q96FE7	P3IP1_HUMAN	Phosphoinositide-3-kinase-interacting protein 1 OS=Homo sapiens GN=PIK3IP1 PE=1 SV=2
8.09	11.3	4	P48058-2	GRIA4_HUMAN	Isoform 2 of Glutamate receptor 4 OS=Homo sapiens GN=GRIA4
2	24.1	4	P01611	KV119_HUMAN	Ig kappa chain V-I region Wes OS=Homo sapiens PE=1 SV=1
8	6.5	4	Q6MZW2	FSTL4_HUMAN	Follistatin-related protein 4 OS=Homo sapiens GN=FSTL4 PE=2 SV=3
4	30.4	4	P01613	KV121_HUMAN	Ig kappa chain V-I region Ni OS=Homo sapiens PE=1 SV=1
2	16.7	4	P04430	KV122_HUMAN	Ig kappa chain V-I region BAN OS=Homo sapiens PE=1 SV=1
3.8	4.2	4	Q6EMK4	VASN_HUMAN	Vasorin OS=Homo sapiens GN=VASN PE=1 SV=1
7.96	16.2	4	B2R7N9	B2R7N9_HUMAN	cDNA, FLJ93532, highly similar to Homo sapiens osteomodulin (OMD), mRNA OS=Homo sapiens PE=2 SV=1
8.02	15.4	4	A8K335	A8K335_HUMAN	cDNA FLJ76254, highly similar to Homo sapiens gamma-glutamyl hydrolase (GGH), mRNA OS=Homo sapiens PE=2 SV=1
6.61	4.6	4	J3KNT4	J3KNT4_HUMAN	Fibroblast growth factor receptor OS=Homo sapiens GN=FGFR1 PE=3 SV=1
6.5	12.9	4	D6REX5	D6REX5_HUMAN	Selenoprotein P (Fragment) OS=Homo sapiens GN=SEPP1 PE=4 SV=1
4.54	11.6	4	P47972	NPTX2_HUMAN	Neuronal pentraxin-2 OS=Homo sapiens GN=NPTX2 PE=1 SV=2
5.2	17.1	4	P23435	CBLN1_HUMAN	Cerebellin-1 OS=Homo sapiens GN=CBLN1 PE=1 SV=1
6.64	16.7	4	D6RDX1	D6RDX1_HUMAN	Vesicular integral-membrane protein VIP36 (Fragment) OS=Homo sapiens GN=LMAN2 PE=2 SV=1
7.66	16.3	4	P22692	IBP4_HUMAN	Insulin-like growth factor-binding protein 4 OS=Homo sapiens GN=IGFBP4 PE=1 SV=2
5.31	17.1	4	Q5U077	Q5U077_HUMAN	L-lactate dehydrogenase OS=Homo sapiens GN=LDHB PE=2 SV=1
6.03	34.3	4	G4XXL9	G4XXL9_HUMAN	Cytochrome c OS=Homo sapiens GN=CYCS PE=2 SV=1
5.33	9.7	4	B7Z2R9	B7Z2R9_HUMAN	Lysosome-associated membrane glycoprotein 2 OS=Homo sapiens GN=LAMP2 PE=2 SV=1
2	6.9	4	P35908	K22E_HUMAN	Keratin, type II cytoskeletal 2 epidermal OS=Homo sapiens GN=KRT2 PE=1 SV=2
0.05	26.3	4	P01763	HV302_HUMAN	Ig heavy chain V-III region WEA OS=Homo sapiens PE=1 SV=1
6.12	17.6	4	Q8NG19	Q8NG19_HUMAN	Multi-functional protein MFP OS=Homo sapiens PE=2 SV=1
6.54	2.8	4	O15031	PLXB2_HUMAN	Plexin-B2 OS=Homo sapiens GN=PLXNB2 PE=1 SV=3
6.01	3.4	4	Q8WX98	Q8WX98_HUMAN	Cell recognition protein CASPR4 OS=Homo sapiens GN=CASPR4 PE=2 SV=1
8	3.5	4	P23470	PTPRG_HUMAN	Receptor-type tyrosine-protein phosphatase gamma OS=Homo sapiens GN=PTPRG PE=1 SV=4
8	3.6	4	Q8IUX7	AEBP1_HUMAN	Adipocyte enhancer-binding protein 1 OS=Homo sapiens GN=AEBP1 PE=1 SV=1
8	7.6	4	Q96IA0	Q96IA0_HUMAN	PTPRN protein (Fragment) OS=Homo sapiens GN=PTPRN PE=2 SV=2
7.28	10.3	4	Q9BTY2	FUCO2_HUMAN	Plasma alpha-L-fucosidase OS=Homo sapiens GN=FUCA2 PE=1 SV=2
6.16	9	4	Q08AL8	Q08AL8_HUMAN	ADAM metallopeptidase domain 22 OS=Homo sapiens GN=ADAM22 PE=2 SV=1
8	44.3	4	J3QTR3	J3QTR3_HUMAN	Ubiquitin (Fragment) OS=Homo sapiens GN=RPS27A PE=1 SV=1
8.22	13	4	Q06828	FMOD_HUMAN	Fibromodulin OS=Homo sapiens GN=FMOD PE=1 SV=2
7.36	8.7	4	P11021	GRP78_HUMAN	78 kDa glucose-regulated protein OS=Homo sapiens GN=HSPA5 PE=1 SV=2
2	7.8	4	H6VRG2	H6VRG2_HUMAN	Keratin 1 OS=Homo sapiens GN=KRT1 PE=3 SV=1
0.92	19.4	4	A2J1M2	A2J1M2_HUMAN	Rheumatoid factor RF-IP9 (Fragment) OS=Homo sapiens PE=2 SV=1
4.04	32.1	4	P06314	KV404_HUMAN	Ig kappa chain V-IV region B17 OS=Homo sapiens PE=2 SV=1
2.33	35.6	4	A0N5G5	A0N5G5_HUMAN	Rheumatoid factor D5 light chain (Fragment) OS=Homo sapiens GN=V<kappa>3 PE=2 SV=1
7.44	7.8	4	H6VRG3	H6VRG3_HUMAN	Keratin 1 OS=Homo sapiens GN=KRT1 PE=3 SV=1
8.1	21.8	4	P05452	TETN_HUMAN	Tetranectin OS=Homo sapiens GN=CLEC3B PE=1 SV=3
0.51	46.9	4	A2J1N0	A2J1N0_HUMAN	Rheumatoid factor RF-IP14 (Fragment) OS=Homo sapiens PE=2 SV=1
4.56	9.1	4	Q59G97	Q59G97_HUMAN	EGF-containing fibulin-like extracellular matrix protein 1 isoform b variant (Fragment) OS=Homo sapiens PE=4 SV=1
5.68	24.8	3	J3KQI0	J3KQI0_HUMAN	Lymphocyte antigen 6H OS=Homo sapiens GN=LY6H PE=4 SV=1
5	10.4	3	B4DTZ8	B4DTZ8_HUMAN	cDNA FLJ52277, highly similar to Follistatin-related protein 1 OS=Homo sapiens PE=2 SV=1
3.46	29.2	3	B2R5G8	B2R5G8_HUMAN	Serum amyloid A protein OS=Homo sapiens PE=2 SV=1
6	12.9	3	H0YDW7	H0YDW7_HUMAN	CD44 antigen (Fragment) OS=Homo sapiens GN=CD44 PE=2 SV=1
4.21	37.6	3	B0YIW2	B0YIW2_HUMAN	Apolipoprotein C-III OS=Homo sapiens GN=APOC3 PE=2 SV=1
4.01	26.7	3	A8K6C9	A8K6C9_HUMAN	cDNA FLJ78037, highly similar to Homo sapiens insulin-like growth factor 2 (somatomedin A), mRNA OS=Homo sapiens PE=2 SV=1
3.42	9.6	3	F8W8J5	F8W8J5_HUMAN	V-set and transmembrane domain-containing protein 2A OS=Homo sapiens GN=VSTM2A PE=2 SV=1
3.33	11	3	Q99574	NEUS_HUMAN	Neuroserpin OS=Homo sapiens GN=SERPINI1 PE=1 SV=1
6	6.9	3	P33908	MA1A1_HUMAN	Mannosyl-oligosaccharide 1,2-alpha-mannosidase IA OS=Homo sapiens GN=MAN1A1 PE=1 SV=3
3.57	36.1	3	Q9UL83	Q9UL83_HUMAN	Myosin-reactive immunoglobulin light chain variable region (Fragment) OS=Homo sapiens PE=1 SV=1
2.18	11.7	3	J3KPS3	J3KPS3_HUMAN	Fructose-bisphosphate aldolase OS=Homo sapiens GN=ALDOA PE=3 SV=1
6.14	16.5	3	A0A4Z1	A0A4Z1_HUMAN	CADM1 protein OS=Homo sapiens GN=CADM1 PE=2 SV=1
2.66	39.7	3	Q96JD0	Q96JD0_HUMAN	Amyloid lambda 6 light chain variable region SAR (Fragment) OS=Homo sapiens PE=1 SV=1
5.24	9.2	3	Q6FHV6	Q6FHV6_HUMAN	ENO2 protein OS=Homo sapiens GN=ENO2 PE=2 SV=1
2.34	12.1	3	Q96IY4	CBPB2_HUMAN	Carboxypeptidase B2 OS=Homo sapiens GN=CPB2 PE=1 SV=2
4.02	6.9	3	H0YAC1	H0YAC1_HUMAN	Plasma kallikrein heavy chain (Fragment) OS=Homo sapiens GN=KLKB1 PE=3 SV=1
4.97	10.3	3	Q9BVJ8	Q9BVJ8_HUMAN	HEXA protein (Fragment) OS=Homo sapiens GN=HEXA PE=2 SV=2
2	17.1	3	P06331	HV209_HUMAN	Ig heavy chain V-II region ARH-77 OS=Homo sapiens PE=4 SV=1
5.17	14.4	3	P23284	PPIB_HUMAN	Peptidyl-prolyl cis-trans isomerase B OS=Homo sapiens GN=PPIB PE=1 SV=2
3.68	9	3	P02747	C1QC_HUMAN	Complement C1q subcomponent subunit C OS=Homo sapiens GN=C1QC PE=1 SV=3
5.52	8.5	3	B2RBG3	B2RBG3_HUMAN	cDNA, FLJ95493, highly similar to Homo sapiens fucosidase, alpha-L- 1, tissue (FUCA1), mRNA OS=Homo sapiens PE=2 SV=1
2	23.9	3	A2IPI6	A2IPI6_HUMAN	HRV Fab 027-VL (Fragment) OS=Homo sapiens PE=2 SV=1
6.09	9	3	G3V0F0	G3V0F0_HUMAN	Putative uncharacterized protein MGC45438 OS=Homo sapiens GN=C16orf89 PE=2 SV=1
6	14.6	3	P00918	CAH2_HUMAN	Carbonic anhydrase 2 OS=Homo sapiens GN=CA2 PE=1 SV=2
3.13	4.2	3	Q17RA0	Q17RA0_HUMAN	Interleukin 6 signal transducer (Gp130, oncostatin M receptor) OS=Homo sapiens GN=IL6ST PE=2 SV=1
5.82	3.2	3	P14543	NID1_HUMAN	Nidogen-1 OS=Homo sapiens GN=NID1 PE=1 SV=3
5.3	6.3	3	E7END6	E7END6_HUMAN	Vitamin K-dependent protein C heavy chain OS=Homo sapiens GN=PROC PE=2 SV=1
2.72	32.2	3	A0N5G3	A0N5G3_HUMAN	Rheumatoid factor G9 light chain (Fragment) OS=Homo sapiens GN=V<lambda>3 PE=2 SV=1
4.07	7.6	3	Q9Y646	CBPQ_HUMAN	Carboxypeptidase Q OS=Homo sapiens GN=CPQ PE=1 SV=1
3.47	6	3	Q9Y4I9	Q9Y4I9_HUMAN	Tyrosine phosphatase IA-2beta OS=Homo sapiens PE=2 SV=1
5.39	7.1	3	Q8NE26	Q8NE26_HUMAN	ADAM metallopeptidase with thrombospondin type 1 motif, 1 OS=Homo sapiens GN=ADAMTS1 PE=2 SV=1
2.53	2.9	3	O94910	LPHN1_HUMAN	Latrophilin-1 OS=Homo sapiens GN=LPHN1 PE=1 SV=1
3.86	6.7	3	M0R0W6	M0R0W6_HUMAN	Tyrosine-protein kinase receptor UFO OS=Homo sapiens GN=AXL PE=3 SV=1
4	2.5	3	B2RCH4	B2RCH4_HUMAN	cDNA, FLJ96073, highly similar to Homo sapiens contactin associated protein-like 2 (CNTNAP2), mRNA OS=Homo sapiens PE=2 SV=1
6.01	13.3	3	B7Z7Q6	B7Z7Q6_HUMAN	Lysosomal Pro-X carboxypeptidase OS=Homo sapiens GN=PRCP PE=2 SV=1
4.64	12.4	3	A8K2H4	A8K2H4_HUMAN	cDNA FLJ78235 OS=Homo sapiens PE=2 SV=1
3.45	15.8	3	Q9NX12	Q9NX12_HUMAN	cDNA FLJ20496 fis, clone KAT08729 OS=Homo sapiens PE=2 SV=1
2.01	7.9	3	A2NB44	A2NB44_HUMAN	Cold agglutinin FS-2 H-chain (Fragment) OS=Homo sapiens GN=IGH@ PE=2 SV=1
2.25	4.1	3	Q8IYG5	Q8IYG5_HUMAN	MOG protein OS=Homo sapiens GN=MOG PE=2 SV=1
2.64	4	3	O95428	PPN_HUMAN	Papilin OS=Homo sapiens GN=PAPLN PE=2 SV=4
4.3	1.8	3	Q92673	SORL_HUMAN	Sortilin-related receptor OS=Homo sapiens GN=SORL1 PE=1 SV=2
6	32.7	3	P01617	KV204_HUMAN	Ig kappa chain V-II region TEW OS=Homo sapiens PE=1 SV=1
6	5.4	3	E7EQ48	E7EQ48_HUMAN	Proteoglycan 4 OS=Homo sapiens GN=PRG4 PE=2 SV=1
0.22	0.6	3	Q13315	ATM_HUMAN	Serine-protein kinase ATM OS=Homo sapiens GN=ATM PE=1 SV=3
6	13.6	3	Q96RZ2	Q96RZ2_HUMAN	N-acetylglucosamine-1-phosphate transferase, gamma subunit, isoform CRA_b OS=Homo sapiens GN=RJD9 PE=2 SV=1
4.68	11.5	3	P00338	LDHA_HUMAN	L-lactate dehydrogenase A chain OS=Homo sapiens GN=LDHA PE=1 SV=2
1.27	11.1	3	Q7LDD5	Q7LDD5_HUMAN	Calcium/calmodulin-dependent protein kinase (CaM kinase) II alpha, isoform CRA_a OS=Homo sapiens GN=CAMK2A PE=2 SV=1
5.04	10.9	3	Q59FD0	Q59FD0_HUMAN	Huntingtin interacting protein-1-related (Fragment) OS=Homo sapiens PE=2 SV=1
2	12.6	3	Q8NHM4	TRY6_HUMAN	Putative trypsin-6 OS=Homo sapiens GN=TRY6 PE=5 SV=1
5.3	29.5	3	B4DM82	B4DM82_HUMAN	cDNA FLJ53060, moderately similar to Peptidyl-prolyl cis-trans isomerase A (EC 5.2.1.8) OS=Homo sapiens PE=2 SV=1
5.65	5.7	3	B4E1N8	B4E1N8_HUMAN	cDNA FLJ51183, highly similar to Extracellular matrix protein 2 OS=Homo sapiens PE=2 SV=1
4	23.6	3	B6EDE2	B6EDE2_HUMAN	Epididymis luminal protein 180 (Fragment) OS=Homo sapiens GN=HEL180 PE=2 SV=1
4.78	3.7	3	Q53HU9	Q53HU9_HUMAN	Complement component 1, r subcomponent variant (Fragment) OS=Homo sapiens PE=2 SV=1
4.79	14.8	3	C9JRR0	C9JRR0_HUMAN	Augurin (Fragment) OS=Homo sapiens GN=C2orf40 PE=2 SV=1
2.03	2.1	3	Q9ULB1-3	NRX1A_HUMAN	Isoform 3a of Neurexin-1 OS=Homo sapiens GN=NRXN1
2.6	0.3	3	Q14204	DYHC1_HUMAN	REVERSED Cytoplasmic dynein 1 heavy chain 1 OS=Homo sapiens GN=DYNC1H1 PE=1 SV=5
2.95	9.7	3	P41271-2	NBL1_HUMAN	Isoform 2 of Neuroblastoma suppressor of tumorigenicity 1 OS=Homo sapiens GN=NBL1
3.01	9.9	3	D3DP13	D3DP13_HUMAN	Fibrinogen beta chain, isoform CRA_e OS=Homo sapiens GN=FGB PE=2 SV=1
4	26	2	K7ERI9	K7ERI9_HUMAN	Truncated apolipoprotein C-I (Fragment) OS=Homo sapiens GN=APOC1 PE=4 SV=1
2	11.8	2	K7ER74	K7ER74_HUMAN	Apolipoprotein C-II OS=Homo sapiens GN=APOC2 PE=4 SV=1
4	8.7	2	Q6B0I4	Q6B0I4_HUMAN	Opioid binding protein/cell adhesion molecule-like OS=Homo sapiens GN=OPCML PE=2 SV=1
4	2.6	2	G3XAE6	G3XAE6_HUMAN	Extracellular sulfatase Sulf-2 OS=Homo sapiens GN=SULF2 PE=2 SV=1
3.08	8.9	2	K7ES70	K7ES70_HUMAN	Microfibril-associated glycoprotein 4 OS=Homo sapiens GN=MFAP4 PE=4 SV=1
2	16.8	2	Q0ZCH6	Q0ZCH6_HUMAN	Immunglobulin heavy chain variable region (Fragment) OS=Homo sapiens PE=4 SV=1
4	7.6	2	B7ZLI0	B7ZLI0_HUMAN	Reticulon 4 receptor-like 2 OS=Homo sapiens GN=RTN4RL2 PE=2 SV=1
1.18	23.3	2	P04434	KV310_HUMAN	Ig kappa chain V-III region VH (Fragment) OS=Homo sapiens PE=4 SV=1
2	3.2	2	P08174-5	DAF_HUMAN	Isoform 5 of Complement decay-accelerating factor OS=Homo sapiens GN=CD55
1.92	9.4	2	A2N011	A2N011_HUMAN	Vh1-D-J3-region (Fragment) OS=Homo sapiens PE=2 SV=1
3.85	23.3	2	Q16568	CART_HUMAN	Cocaine- and amphetamine-regulated transcript protein OS=Homo sapiens GN=CARTPT PE=1 SV=1
4.01	6.5	2	Q8TCF0	Q8TCF0_HUMAN	LBP protein OS=Homo sapiens GN=LBP PE=2 SV=1
2.42	0.6	2	Q9NYQ8	FAT2_HUMAN	Protocadherin Fat 2 OS=Homo sapiens GN=FAT2 PE=1 SV=2
4	22.9	2	P80723	BASP1_HUMAN	Brain acid soluble protein 1 OS=Homo sapiens GN=BASP1 PE=1 SV=2
4	9.5	2	A6NLU5	VTM2B_HUMAN	V-set and transmembrane domain-containing protein 2B OS=Homo sapiens GN=VSTM2B PE=2 SV=2
4.11	18.7	2	Q6IB39	Q6IB39_HUMAN	RNASE6 protein OS=Homo sapiens GN=RNASE6 PE=2 SV=1
4	3.9	2	P22792	CPN2_HUMAN	Carboxypeptidase N subunit 2 OS=Homo sapiens GN=CPN2 PE=1 SV=3
2	28.2	2	Q562M3	Q562M3_HUMAN	Actin-like protein (Fragment) OS=Homo sapiens GN=ACT PE=3 SV=1
4	4.1	2	Q59HE0	Q59HE0_HUMAN	Colony stimulating factor 1 receptor variant (Fragment) OS=Homo sapiens PE=2 SV=1
0.5	7	2	P01824	HV206_HUMAN	Ig heavy chain V-II region WAH OS=Homo sapiens PE=1 SV=1
4	12.3	2	Q99674	CGRE1_HUMAN	Cell growth regulator with EF hand domain protein 1 OS=Homo sapiens GN=CGREF1 PE=2 SV=2
4	9.1	2	H0Y3T6	H0Y3T6_HUMAN	45 kDa calcium-binding protein (Fragment) OS=Homo sapiens GN=SDF4 PE=4 SV=1
2.95	3.8	2	Q03167	TGBR3_HUMAN	Transforming growth factor beta receptor type 3 OS=Homo sapiens GN=TGFBR3 PE=1 SV=3
4	1.6	2	Q2M1J3	Q2M1J3_HUMAN	ROBO1 protein OS=Homo sapiens GN=ROBO1 PE=2 SV=1
3.77	5.6	2	B2R672	B2R672_HUMAN	Extracellular link domain containing 1 OS=Homo sapiens GN=XLKD1 PE=2 SV=1
2.06	2.9	2	B7Z9U4	B7Z9U4_HUMAN	cDNA, FLJ78958, highly similar to Calsyntenin-3 OS=Homo sapiens PE=2 SV=1
1.8	4.9	2	Q9H606	CY017_HUMAN	Putative uncharacterized protein CYorf17 OS=Homo sapiens GN=CYorf17 PE=2 SV=1
1.46	4.6	2	Q86TV4	Q86TV4_HUMAN	Full-length cDNA clone CS0DI085YI08 of Placenta of Homo sapiens (human) (Fragment) OS=Homo sapiens PE=2 SV=1
0.9	8.1	2	B1AKG0	B1AKG0_HUMAN	Complement factor H-related protein 1 OS=Homo sapiens GN=CFHR1 PE=2 SV=1
3.07	4.2	2	J3KP07	J3KP07_HUMAN	Growth arrest-specific protein 6 OS=Homo sapiens GN=GAS6 PE=4 SV=1
3.46	8.1	2	B3KXJ2	B3KXJ2_HUMAN	cDNA FLJ45536 fis, clone BRTHA2031917, highly similar to Ciliary neurotrophic factor receptor alpha OS=Homo sapiens PE=2 SV=1
2.23	4.7	2	Q06033	ITIH3_HUMAN	Inter-alpha-trypsin inhibitor heavy chain H3 OS=Homo sapiens GN=ITIH3 PE=1 SV=2
3.8	6.5	2	Q2KHQ6	Q2KHQ6_HUMAN	APOL1 protein OS=Homo sapiens GN=APOL1 PE=2 SV=2
3.39	4.4	2	Q5VVQ8	Q5VVQ8_HUMAN	Complement component 4 binding protein, alpha, isoform CRA_c OS=Homo sapiens GN=C4BPA PE=2 SV=1
2.7	8.3	2	B4DGD7	B4DGD7_HUMAN	cDNA FLJ53595, highly similar to Iduronate 2-sulfatase (EC 3.1.6.13) OS=Homo sapiens PE=2 SV=1
4	19.3	2	Q8WWX9	SELM_HUMAN	Selenoprotein M OS=Homo sapiens GN=SELM PE=1 SV=3
4.11	7.5	2	Q9Y2T3	GUAD_HUMAN	Guanine deaminase OS=Homo sapiens GN=GDA PE=1 SV=1
4.01	5.2	2	K7ELL7	K7ELL7_HUMAN	Glucosidase 2 subunit beta OS=Homo sapiens GN=PRKCSH PE=4 SV=1
3.6	40.2	2	P04271	S100B_HUMAN	Protein S100-B OS=Homo sapiens GN=S100B PE=1 SV=2
2	4.3	2	Q9NZP8	C1RL_HUMAN	Complement C1r subcomponent-like protein OS=Homo sapiens GN=C1RL PE=1 SV=2
4	7.4	2	F8VWW8	F8VWW8_HUMAN	Acid sphingomyelinase-like phosphodiesterase 3b OS=Homo sapiens GN=SMPDL3B PE=2 SV=1
2	5.1	2	P24593	IBP5_HUMAN	Insulin-like growth factor-binding protein 5 OS=Homo sapiens GN=IGFBP5 PE=1 SV=1
2.38	2.3	2	F5GZZ9	F5GZZ9_HUMAN	Scavenger receptor cysteine-rich type 1 protein M130 OS=Homo sapiens GN=CD163 PE=2 SV=1
4.12	6.1	2	B3KW79	B3KW79_HUMAN	cDNA FLJ42481 fis, clone BRACE2032090, highly similar to Probable serine carboxypeptidase CPVL (EC 3.4.16.-) OS=Homo sapiens PE=2 SV=1
2	3	2	Q53GE4	Q53GE4_HUMAN	REVERSED Leucine rich repeat containing 19 variant (Fragment) OS=Homo sapiens PE=2 SV=1
2.04	10.3	2	Q8TCZ2	C99L2_HUMAN	CD99 antigen-like protein 2 OS=Homo sapiens GN=CD99L2 PE=1 SV=1
4	9.3	2	P52799	EFNB2_HUMAN	Ephrin-B2 OS=Homo sapiens GN=EFNB2 PE=1 SV=1
0.17	13.5	2	B2R4C5	B2R4C5_HUMAN	Lysozyme OS=Homo sapiens GN=LYZ PE=2 SV=1
4.09	6.2	2	B4DWK8	B4DWK8_HUMAN	Catalase OS=Homo sapiens PE=2 SV=1
4	16.2	2	P07108-5	ACBP_HUMAN	Isoform 5 of Acyl-CoA-binding protein OS=Homo sapiens GN=DBI
2.02	2.4	2	Q5VU97	CAHD1_HUMAN	VWFA and cache domain-containing protein 1 OS=Homo sapiens GN=CACHD1 PE=2 SV=2
2	0.3	2	D6RGG3	D6RGG3_HUMAN	Collagen alpha-1(XII) chain OS=Homo sapiens GN=COL12A1 PE=2 SV=1
0.13	2.8	2	Q504Y0	S39AC_HUMAN	Zinc transporter ZIP12 OS=Homo sapiens GN=SLC39A12 PE=2 SV=3
2.41	5.7	2	Q12787	Q12787_HUMAN	Receptor tyrosine kinase (Fragment) OS=Homo sapiens PE=2 SV=1
2.39	12.2	2	Q9HAU6	FKSG2_HUMAN	Putative apoptosis inhibitor FKSG2 OS=Homo sapiens GN=FKSG2 PE=5 SV=2
2.51	4.8	2	Q9UBX1	CATF_HUMAN	Cathepsin F OS=Homo sapiens GN=CTSF PE=1 SV=1
2.39	5.8	2	Q6ZMV9-4	KIF6_HUMAN	REVERSED Isoform 4 of Kinesin-like protein KIF6 OS=Homo sapiens GN=KIF6
4.02	4.6	2	Q6ZRP7	QSOX2_HUMAN	Sulfhydryl oxidase 2 OS=Homo sapiens GN=QSOX2 PE=1 SV=3
4	6	2	Q9BQ16	TICN3_HUMAN	Testican-3 OS=Homo sapiens GN=SPOCK3 PE=1 SV=2
3.37	4.5	2	Q9NX62	IMPA3_HUMAN	Inositol monophosphatase 3 OS=Homo sapiens GN=IMPAD1 PE=1 SV=1
2	2.5	2	Q59F71	Q59F71_HUMAN	Bone morphogenetic protein 1 isoform 1, variant (Fragment) OS=Homo sapiens PE=2 SV=1
2.72	6.9	2	Q16769	QPCT_HUMAN	Glutaminyl-peptide cyclotransferase OS=Homo sapiens GN=QPCT PE=1 SV=1
3.89	21.8	2	O95445	APOM_HUMAN	Apolipoprotein M OS=Homo sapiens GN=APOM PE=1 SV=2
3.06	27.8	2	Q96SB0	Q96SB0_HUMAN	Anti-streptococcal/anti-myosin immunoglobulin lambda light chain variable region (Fragment) OS=Homo sapiens PE=2 SV=1
4	7.5	2	P40925	MDHC_HUMAN	Malate dehydrogenase, cytoplasmic OS=Homo sapiens GN=MDH1 PE=1 SV=4
2	2.2	2	Q5HYL4	Q5HYL4_HUMAN	Putative uncharacterized protein DKFZp686E1893 OS=Homo sapiens GN=DKFZp686E1893 PE=2 SV=1
2	10.8	2	E9PJ29	E9PJ29_HUMAN	Out at first protein homolog OS=Homo sapiens GN=OAF PE=2 SV=1
1.75	2.7	2	F5GWR7	F5GWR7_HUMAN	Receptor-type tyrosine-protein phosphatase delta OS=Homo sapiens GN=PTPRD PE=2 SV=1
2	2.7	2	Q7Z3T9	Q7Z3T9_HUMAN	Putative uncharacterized protein DKFZp686J1169 OS=Homo sapiens GN=DKFZp686J1169 PE=2 SV=1
0.55	2	2	C9JVC9	C9JVC9_HUMAN	Voltage-dependent calcium channel subunit alpha-2/delta-2 OS=Homo sapiens GN=CACNA2D2 PE=2 SV=1
3.86	1.7	2	O75882	ATRN_HUMAN	Attractin OS=Homo sapiens GN=ATRN PE=1 SV=2
3.44	9.2	2	D6RA08	D6RA08_HUMAN	Complement C1q subcomponent subunit B (Fragment) OS=Homo sapiens GN=C1QB PE=2 SV=1
2	1.2	2	H0YNG5	H0YNG5_HUMAN	Alpha-mannosidase 2x OS=Homo sapiens GN=MAN2A2 PE=2 SV=1
1.74	2.9	2	Q5JP69	Q5JP69_HUMAN	Complement component 2, isoform CRA_b OS=Homo sapiens GN=C2 PE=2 SV=1
2.75	0.9	2	P23471	PTPRZ_HUMAN	Receptor-type tyrosine-protein phosphatase zeta OS=Homo sapiens GN=PTPRZ1 PE=1 SV=4
0.83	1.7	2	B4DRY1	B4DRY1_HUMAN	cDNA FLJ54428, highly similar to SLIT and NTRK-like protein 1 OS=Homo sapiens PE=2 SV=1
0.29	2.3	2	B1AMR4	B1AMR4_HUMAN	Rho guanine nucleotide exchange factor 9 OS=Homo sapiens GN=ARHGEF9 PE=2 SV=1
2.01	1	2	Q59GJ0	Q59GJ0_HUMAN	Eukaryotic translation initiation factor 4 gamma, 3 variant (Fragment) OS=Homo sapiens PE=2 SV=1
3.68	6.8	2	O14498	ISLR_HUMAN	Immunoglobulin superfamily containing leucine-rich repeat protein OS=Homo sapiens GN=ISLR PE=1 SV=1
1.1	29.6	2	Q5T4B6	Q5T4B6_HUMAN	HCG1780554 OS=Homo sapiens GN=TMSB4XP4 PE=4 SV=1
2.16	0	2	Q8WZ42-12	TITIN_HUMAN	REVERSED Isoform 12 of Titin OS=Homo sapiens GN=TTN
0.37	19.5	2	A2NWW1	A2NWW1_HUMAN	VH-3 family (VH26)D/J protein (Fragment) OS=Homo sapiens GN=VH-3 family (VH26)D/J PE=4 SV=1
4	18.4	2	Q9UL95	Q9UL95_HUMAN	Myosin-reactive immunoglobulin heavy chain variable region (Fragment) OS=Homo sapiens PE=2 SV=1
4.09	2.3	2	A8K1S0	A8K1S0_HUMAN	cDNA FLJ75250, highly similar to Homo sapiens contactin 2 (axonal) (CNTN2), mRNA OS=Homo sapiens PE=2 SV=1
0.79	0.7	2	F8W6L6	F8W6L6_HUMAN	Myosin-10 OS=Homo sapiens GN=MYH10 PE=2 SV=1
4	14.2	2	P01210	PENK_HUMAN	Proenkephalin-A OS=Homo sapiens GN=PENK PE=1 SV=1
2	21.3	2	P01593	KV101_HUMAN	Ig kappa chain V-I region AG OS=Homo sapiens PE=1 SV=1
1.14	4.8	2	F5H7E1	F5H7E1_HUMAN	Inter-alpha-trypsin inhibitor heavy chain H1 OS=Homo sapiens GN=ITIH1 PE=2 SV=1
2	1.7	1	Q9BTE3	MCMBP_HUMAN	Mini-chromosome maintenance complex-binding protein OS=Homo sapiens GN=MCMBP PE=1 SV=2
0.97	4.1	1	P02745	C1QA_HUMAN	Complement C1q subcomponent subunit A OS=Homo sapiens GN=C1QA PE=1 SV=2
2	2.1	1	Q9NWK9	BCD1_HUMAN	Box C/D snoRNA protein 1 OS=Homo sapiens GN=ZNHIT6 PE=1 SV=1
2	6.5	1	Q59GC4	Q59GC4_HUMAN	Transcription factor E2F5 variant (Fragment) OS=Homo sapiens PE=2 SV=1
0.36	29.6	1	Q6FGG5	Q6FGG5_HUMAN	SCRG1 protein OS=Homo sapiens GN=SCRG1 PE=2 SV=1
0.43	4.1	1	H0YEB6	H0YEB6_HUMAN	REVERSED Sjoegren syndrome/scleroderma autoantigen 1 (Fragment) OS=Homo sapiens GN=SSSCA1 PE=2 SV=1
2	2	1	A8K5A9	A8K5A9_HUMAN	cDNA FLJ77532, highly similar to Homo sapiens zinc finger and SCAN domain containing 2 (ZSCAN2), transcript variant 1, mRNA OS=Homo sapiens PE=2 SV=1
2	0.4	1	Q9Y2E4	DIP2C_HUMAN	Disco-interacting protein 2 homolog C OS=Homo sapiens GN=DIP2C PE=2 SV=2
2	5.8	1	Q8N8F1	Q8N8F1_HUMAN	Exostoses (Multiple)-like 2, isoform CRA_b OS=Homo sapiens GN=EXTL2 PE=2 SV=1
2	3	1	Q6FHC9	Q6FHC9_HUMAN	STC2 protein (Fragment) OS=Homo sapiens GN=STC2 PE=2 SV=1
2	2.1	1	Q14520	HABP2_HUMAN	Hyaluronan-binding protein 2 OS=Homo sapiens GN=HABP2 PE=1 SV=1
2	2.1	1	B4DWF9	B4DWF9_HUMAN	cDNA FLJ60358, highly similar to Regulator of G-protein signaling 3 OS=Homo sapiens PE=2 SV=1
0.54	10.8	1	C9J0J0	C9J0J0_HUMAN	Coiled-coil domain-containing protein 126 (Fragment) OS=Homo sapiens GN=CCDC126 PE=2 SV=1
0.24	3.7	1	Q53G71	Q53G71_HUMAN	Calreticulin variant (Fragment) OS=Homo sapiens PE=2 SV=1
1.42	14.8	1	K7EQU5	K7EQU5_HUMAN	Poliovirus receptor (Fragment) OS=Homo sapiens GN=PVR PE=4 SV=1
1.73	4.5	1	P02743	SAMP_HUMAN	Serum amyloid P-component OS=Homo sapiens GN=APCS PE=1 SV=2
2	1.4	1	Q8TAM9	Q8TAM9_HUMAN	Intercellular adhesion molecule 5, telencephalin OS=Homo sapiens GN=ICAM5 PE=2 SV=1
2	4.8	1	P04438	HV208_HUMAN	Ig heavy chain V-II region SESS OS=Homo sapiens PE=2 SV=1
2	4	1	J3KNF6	J3KNF6_HUMAN	RGM domain family member B OS=Homo sapiens GN=RGMB PE=4 SV=1
2	4.3	1	Q8NCE1	Q8NCE1_HUMAN	cDNA FLJ90312 fis, clone NT2RP2001276, moderately similar to NPDC-1 PROTEIN OS=Homo sapiens PE=2 SV=1
2.02	2.4	1	Q5CAQ5	Q5CAQ5_HUMAN	Tumor rejection antigen (Gp96) 1 OS=Homo sapiens GN=TRA1 PE=2 SV=1
0.59	2.3	1	Q9NY97	B3GN2_HUMAN	UDP-GlcNAc:betaGal beta-1,3-N-acetylglucosaminyltransferase 2 OS=Homo sapiens GN=B3GNT2 PE=1 SV=2
2	2.3	1	Q9NZ53	PDXL2_HUMAN	Podocalyxin-like protein 2 OS=Homo sapiens GN=PODXL2 PE=1 SV=1
0.75	2.1	1	Q53GN8	Q53GN8_HUMAN	Macrophage stimulating 1 (Hepatocyte growth factor-like) variant (Fragment) OS=Homo sapiens PE=2 SV=1
2	3.8	1	Q6FHI7	Q6FHI7_HUMAN	CA4 protein OS=Homo sapiens GN=CA4 PE=2 SV=1
2	1.7	1	Q9ULF5	S39AA_HUMAN	Zinc transporter ZIP10 OS=Homo sapiens GN=SLC39A10 PE=1 SV=2
2	16	1	R4GMW4	R4GMW4_HUMAN	Splicing factor, arginine/serine-rich 19 (Fragment) OS=Homo sapiens GN=SRA1 PE=4 SV=1
2.04	3.9	1	Q6IBC3	Q6IBC3_HUMAN	CTSH protein OS=Homo sapiens GN=CTSH PE=2 SV=1
1.8	6.5	1	P21246	PTN_HUMAN	Pleiotrophin OS=Homo sapiens GN=PTN PE=1 SV=1
2.03	2	1	Q86Y38	XYLT1_HUMAN	Xylosyltransferase 1 OS=Homo sapiens GN=XYLT1 PE=1 SV=1
1.6	4.5	1	H0YCY8	H0YCY8_HUMAN	Dipeptidyl peptidase 1 exclusion domain chain (Fragment) OS=Homo sapiens GN=CTSC PE=4 SV=1
0.1	0.4	1	Q6IE36	OVOS2_HUMAN	REVERSED Ovostatin homolog 2 OS=Homo sapiens GN=OVOS2 PE=2 SV=2
2	8.2	1	J3QS03	J3QS03_HUMAN	Twisted gastrulation protein homolog 1 OS=Homo sapiens GN=TWSG1 PE=4 SV=1
2	2.5	1	Q5J875	Q5J875_HUMAN	GUGU gamma form OS=Homo sapiens GN=GUGU PE=2 SV=1
2	12.1	1	Q6NVI1	Q6NVI1_HUMAN	MARCKS protein (Fragment) OS=Homo sapiens GN=MARCKS PE=2 SV=1
2.01	2.1	1	K4DIA0	K4DIA0_HUMAN	ICOS ligand OS=Homo sapiens GN=ICOSLG PE=4 SV=1
2	9.3	1	P10153	RNAS2_HUMAN	Non-secretory ribonuclease OS=Homo sapiens GN=RNASE2 PE=1 SV=2
2	8.8	1	Q53XB4	Q53XB4_HUMAN	Full-length cDNA clone CS0DF032YM23 of Fetal brain of Homo sapiens (human) OS=Homo sapiens GN=hCG_2044782 PE=2 SV=1
2	1.9	1	H0YDE5	H0YDE5_HUMAN	UPF0606 protein KIAA1549L (Fragment) OS=Homo sapiens GN=KIAA1549L PE=4 SV=1
2	13.4	1	A4D158	A4D158_HUMAN	Neuropeptide Y OS=Homo sapiens GN=NPY PE=2 SV=1
2	6	1	Q9NYX4	CALY_HUMAN	Neuron-specific vesicular protein calcyon OS=Homo sapiens GN=CALY PE=1 SV=1
0.14	9.2	1	Q5NV83	Q5NV83_HUMAN	V3-3 protein (Fragment) OS=Homo sapiens GN=IGLV7-46 PE=4 SV=1
2	0.3	1	O75643	U520_HUMAN	U5 small nuclear ribonucleoprotein 200 kDa helicase OS=Homo sapiens GN=SNRNP200 PE=1 SV=2
1.47	2	1	P29120	NEC1_HUMAN	Neuroendocrine convertase 1 OS=Homo sapiens GN=PCSK1 PE=1 SV=2
1.8	9.7	1	Q5U058	Q5U058_HUMAN	Growth associated protein 43 OS=Homo sapiens GN=GAP43 PE=2 SV=1
0.1	9.7	1	A0N7J6	A0N7J6_HUMAN	REV25-2 (Fragment) OS=Homo sapiens PE=2 SV=1
2	3.3	1	Q2TSD0	Q2TSD0_HUMAN	Glyceraldehyde-3-phosphate dehydrogenase OS=Homo sapiens PE=2 SV=1
2	12.6	1	C7DJS2	C7DJS2_HUMAN	Glutathione S-transferase pi (Fragment) OS=Homo sapiens GN=GSTP1 PE=2 SV=1
2	3.2	1	Q5JTD5	Q5JTD5_HUMAN	cDNA FLJ50818, highly similar to Protein YIPF3 OS=Homo sapiens PE=2 SV=1
1.51	19.3	1	F5H7R9	F5H7R9_HUMAN	Parathymosin (Fragment) OS=Homo sapiens GN=PTMS PE=2 SV=1
2	4.9	1	P30043	BLVRB_HUMAN	Flavin reductase (NADPH) OS=Homo sapiens GN=BLVRB PE=1 SV=3
0.13	9.1	1	P01771	HV310_HUMAN	Ig heavy chain V-III region HIL OS=Homo sapiens PE=1 SV=1
2	6.1	1	R4GMY4	R4GMY4_HUMAN	Neuroblastoma suppressor of tumorigenicity 1 (Fragment) OS=Homo sapiens GN=NBL1 PE=4 SV=1
2	1.8	1	Q5FWE3	PRRT3_HUMAN	Proline-rich transmembrane protein 3 OS=Homo sapiens GN=PRRT3 PE=1 SV=3
2	16.5	1	Q5NV70	Q5NV70_HUMAN	V1-11 protein (Fragment) OS=Homo sapiens GN=V1-11 PE=4 SV=1
2	2	1	Q53FL7	Q53FL7_HUMAN	Vascular cell adhesion molecule 1 isoform a variant (Fragment) OS=Homo sapiens PE=2 SV=1
2	2.3	1	O75628	REM1_HUMAN	REVERSED GTP-binding protein REM 1 OS=Homo sapiens GN=REM1 PE=1 SV=2
0.34	2.1	1	Q53HU8	Q53HU8_HUMAN	Vimentin variant (Fragment) OS=Homo sapiens PE=2 SV=1
2	3.2	1	Q5STZ8	Q5STZ8_HUMAN	ATP-binding cassette sub-family F member 1 (Fragment) OS=Homo sapiens GN=ABCF1 PE=2 SV=2
0.32	14.3	1	P23582	ANFC_HUMAN	C-type natriuretic peptide OS=Homo sapiens GN=NPPC PE=1 SV=1
2	1.1	1	P39059	COFA1_HUMAN	Collagen alpha-1(XV) chain OS=Homo sapiens GN=COL15A1 PE=1 SV=2
2	7.9	1	A5H458	A5H458_HUMAN	Heparan sulfate 3-O-sulfotransferase 4 (Fragment) OS=Homo sapiens GN=HS3ST4 PE=2 SV=1
2	19.5	1	F2Z337	F2Z337_HUMAN	Myoglobin (Fragment) OS=Homo sapiens GN=MB PE=2 SV=1
2	1.3	1	Q9UN70	PCDGK_HUMAN	Protocadherin gamma-C3 OS=Homo sapiens GN=PCDHGC3 PE=1 SV=1
2	13.4	1	E5RJW2	E5RJW2_HUMAN	Ly-6/neurotoxin-like protein 1 (Fragment) OS=Homo sapiens GN=LYNX1 PE=2 SV=1
2	5.6	1	P20851	C4BPB_HUMAN	C4b-binding protein beta chain OS=Homo sapiens GN=C4BPB PE=1 SV=1
2.01	5	1	P05937	CALB1_HUMAN	Calbindin OS=Homo sapiens GN=CALB1 PE=1 SV=2
0.08	1.8	1	B4E240	B4E240_HUMAN	REVERSED cDNA FLJ58827, highly similar to UBX domain-containing protein 2 OS=Homo sapiens PE=2 SV=1
0.91	3.3	1	Q5HYM1	Q5HYM1_HUMAN	Putative uncharacterized protein DKFZp686O1553 (Fragment) OS=Homo sapiens GN=DKFZp686O1553 PE=1 SV=1
1.7	1.7	1	D6RAR4	D6RAR4_HUMAN	Hepatocyte growth factor activator OS=Homo sapiens GN=HGFAC PE=2 SV=1
2	6.5	1	A6XND1	A6XND1_HUMAN	Insulin-like growth factor binding protein 3 isoform b OS=Homo sapiens PE=2 SV=1
1.29	0.7	1	Q6P9G8	Q6P9G8_HUMAN	Family with sequence similarity 184, member A OS=Homo sapiens GN=FAM184A PE=2 SV=2
2	2.2	1	B3KNK9	B3KNK9_HUMAN	Golgi phosphoprotein 2, isoform CRA_a OS=Homo sapiens GN=GOLPH2 PE=2 SV=1
1.31	7.9	1	D3JV41	D3JV41_HUMAN	Thrombocidin-2 antimicrobial variant (Fragment) OS=Homo sapiens PE=2 SV=1
2	10.1	1	E7ESF5	E7ESF5_HUMAN	Calcitonin gene-related peptide 2 OS=Homo sapiens GN=CALCB PE=2 SV=1
1.74	2.8	1	Q8TEG0	Q8TEG0_HUMAN	FLJ00237 protein (Fragment) OS=Homo sapiens GN=FLJ00237 PE=2 SV=1
2	5.9	1	Q9BUJ0	ABHEA_HUMAN	Alpha/beta hydrolase domain-containing protein 14A OS=Homo sapiens GN=ABHD14A PE=2 SV=2
2	3.5	1	B4DJ06	B4DJ06_HUMAN	cDNA FLJ56620 OS=Homo sapiens PE=2 SV=1
0.59	2.4	1	D3DRE0	D3DRE0_HUMAN	Fibroblast growth factor receptor 2 (Bacteria-expressed kinase, keratinocyte growth factor receptor, craniofacial dysostosis 1, Crouzon syndrome, Pfeiffer syndrome, Jackson-Weiss syndrome), isoform CRA_e OS=Homo sapiens GN=FGFR2 PE=4 SV=1
2	0.5	1	P24043	LAMA2_HUMAN	Laminin subunit alpha-2 OS=Homo sapiens GN=LAMA2 PE=1 SV=4
2	4.7	1	Q96DM2	Q96DM2_HUMAN	cDNA FLJ32631 fis, clone SYNOV1000164 OS=Homo sapiens PE=2 SV=1
2	1.4	1	Q9UPU3	SORC3_HUMAN	VPS10 domain-containing receptor SorCS3 OS=Homo sapiens GN=SORCS3 PE=2 SV=2
2	3.2	1	B4E394	B4E394_HUMAN	cDNA FLJ51483, highly similar to Multiple inositol polyphosphate phosphatase 1 (EC 3.1.3.62) OS=Homo sapiens PE=2 SV=1
1	10.9	1	P03950	ANGI_HUMAN	Angiogenin OS=Homo sapiens GN=ANG PE=1 SV=1
2	1.2	1	B2RCC8	B2RCC8_HUMAN	cDNA, FLJ95990 OS=Homo sapiens PE=2 SV=1
2.01	1.5	1	B7ZLJ8	B7ZLJ8_HUMAN	SEZ6L protein OS=Homo sapiens GN=SEZ6L PE=2 SV=1
2	3.1	1	F8WA83	F8WA83_HUMAN	Protein disulfide-isomerase A6 OS=Homo sapiens GN=PDIA6 PE=2 SV=1
2	3.2	1	B4DKD2	B4DKD2_HUMAN	Disintegrin and metalloproteinase domain-containing protein 11 OS=Homo sapiens GN=ADAM11 PE=2 SV=1
2	6.3	1	Q3LID8	Q3LID8_HUMAN	Neurexophilin OS=Homo sapiens GN=Nbla00697 PE=2 SV=1
2	2.7	1	B4DF37	B4DF37_HUMAN	cDNA FLJ52671, highly similar to SRR1-like protein OS=Homo sapiens PE=2 SV=1
1.38	3.3	1	B4E1V6	B4E1V6_HUMAN	cDNA FLJ54235, highly similar to Ceroid-lipofuscinosis neuronal protein 5 OS=Homo sapiens PE=2 SV=1
0.25	2	1	E9PL22	E9PL22_HUMAN	Hypoxia up-regulated protein 1 OS=Homo sapiens GN=HYOU1 PE=2 SV=1
0.09	17.9	1	Q2F831	Q2F831_HUMAN	Tyrosine 3-monooxygenasea/tryptophan 5-monooxygenase activation protein zeta (Fragment) OS=Homo sapiens PE=2 SV=1
2	4	1	Q6LEU8	Q6LEU8_HUMAN	SPINT2 protein (Fragment) OS=Homo sapiens GN=SPINT2 PE=2 SV=1
2.04	0.8	1	Q14112	NID2_HUMAN	Nidogen-2 OS=Homo sapiens GN=NID2 PE=1 SV=3
0.1	0	1	Q9UKK3	PARP4_HUMAN	REVERSED Poly [ADP-ribose] polymerase 4 OS=Homo sapiens GN=PARP4 PE=1 SV=3
0.12	1.8	1	F8WEB5	F8WEB5_HUMAN	Netrin-G1 OS=Homo sapiens GN=NTNG1 PE=2 SV=1
2	5.4	1	Q9BRL5	Q9BRL5_HUMAN	CALM3 protein OS=Homo sapiens PE=2 SV=1
0.23	7.2	1	Q53EY8	Q53EY8_HUMAN	Adenylate kinase 1 variant (Fragment) OS=Homo sapiens PE=2 SV=1
2	8	1	C9JMJ2	C9JMJ2_HUMAN	Secreted frizzled-related protein 4 (Fragment) OS=Homo sapiens GN=SFRP4 PE=2 SV=1
1.64	1.3	1	P80108	PHLD_HUMAN	Phosphatidylinositol-glycan-specific phospholipase D OS=Homo sapiens GN=GPLD1 PE=1 SV=3
2	1.7	1	B4DJ54	B4DJ54_HUMAN	cDNA FLJ53010, highly similar to Soluble calcium-activated nucleotidase 1 (EC 3.6.1.6) OS=Homo sapiens PE=2 SV=1
2	14.4	1	J3QKN1	J3QKN1_HUMAN	FXYD domain containing ion transport regulator 6, isoform CRA_b OS=Homo sapiens GN=FXYD6 PE=4 SV=1
2	1	1	Q4QQH1	Q4QQH1_HUMAN	SLIT and NTRK-like family, member 5 OS=Homo sapiens GN=SLITRK5 PE=2 SV=1
2	38.9	1	H7BZ18	H7BZ18_HUMAN	Multiple coagulation factor deficiency protein 2 (Fragment) OS=Homo sapiens GN=MCFD2 PE=2 SV=1
2	5.8	1	Q6FHE2	Q6FHE2_HUMAN	ICAM2 protein OS=Homo sapiens GN=ICAM2 PE=2 SV=1
0.45	4.7	1	Q9Y2D0	CAH5B_HUMAN	Carbonic anhydrase 5B, mitochondrial OS=Homo sapiens GN=CA5B PE=1 SV=1
1.39	5.3	1	C9IYR0	C9IYR0_HUMAN	REVERSED Transcription regulator protein BACH1 (Fragment) OS=Homo sapiens GN=BACH1 PE=2 SV=1
0.63	3.5	1	H3BUX1	H3BUX1_HUMAN	Mesothelin (Fragment) OS=Homo sapiens GN=MSLN PE=2 SV=1
0.18	1.8	1	Q96IU6	Q96IU6_HUMAN	COCH protein OS=Homo sapiens GN=COCH PE=2 SV=1
2	4.6	1	Q9HBR1	Q9HBR1_HUMAN	Putative uncharacterized protein OS=Homo sapiens PE=2 SV=1
2	1.4	1	Q9Y6P1	Q9Y6P1_HUMAN	MLL (Fragment) OS=Homo sapiens GN=MLL PE=2 SV=1
2	2	1	P0DKV0	S31C1_HUMAN	Spermatogenesis-associated protein 31C1 OS=Homo sapiens GN=SPATA31C1 PE=2 SV=1
0.3	2.8	1	Q86V86	PIM3_HUMAN	Serine/threonine-protein kinase pim-3 OS=Homo sapiens GN=PIM3 PE=1 SV=3
2.01	4.8	1	Q5URX0	Q5URX0_HUMAN	Beta-hexosaminidase subunit beta OS=Homo sapiens GN=HEXB PE=2 SV=1
2	5.7	1	F5H283	F5H283_HUMAN	Testican-2 OS=Homo sapiens GN=SPOCK2 PE=2 SV=1
0.87	3.8	1	A8K2Q6	A8K2Q6_HUMAN	Peptidyl-prolyl cis-trans isomerase OS=Homo sapiens PE=2 SV=1
0.17	2.5	1	Q05DJ8	Q05DJ8_HUMAN	HTRA1 protein (Fragment) OS=Homo sapiens GN=HTRA1 PE=2 SV=1
2	1.5	1	E7ES19	E7ES19_HUMAN	Thrombospondin-4 OS=Homo sapiens GN=THBS4 PE=2 SV=1
2	26.3	1	F5H6G8	F5H6G8_HUMAN	MANSC domain-containing protein 1 (Fragment) OS=Homo sapiens GN=MANSC1 PE=2 SV=1
0.98	10.1	1	P01708	LV205_HUMAN	Ig lambda chain V-II region BUR OS=Homo sapiens PE=1 SV=1
2	2.7	1	Q68D28	Q68D28_HUMAN	Carbonic anhydrase-related protein 10 OS=Homo sapiens GN=DKFZp686I20267 PE=2 SV=1
2	16.7	1	P01714	LV301_HUMAN	Ig lambda chain V-III region SH OS=Homo sapiens PE=1 SV=1
0.17	1.1	1	E9PAU2	E9PAU2_HUMAN	Ribonucleoprotein PTB-binding 1 OS=Homo sapiens GN=RAVER1 PE=4 SV=1
0.25	1.9	1	B4DR87	B4DR87_HUMAN	Procollagen-lysine,2-oxoglutarate 5-dioxygenase 1 OS=Homo sapiens GN=PLOD1 PE=2 SV=1
1.77	1.2	1	G3XAD4	G3XAD4_HUMAN	Contactin 4, isoform CRA_e OS=Homo sapiens GN=CNTN4 PE=2 SV=1
0.12	2.3	1	Q9BZQ2	SHP1L_HUMAN	SHC SH2 domain-binding protein 1-like protein OS=Homo sapiens GN=SHCBP1L PE=1 SV=2
0.2	0.7	1	Q96ST3	SIN3A_HUMAN	Paired amphipathic helix protein Sin3a OS=Homo sapiens GN=SIN3A PE=1 SV=2
2	1.2	1	Q8N3T6	T132C_HUMAN	Transmembrane protein 132C OS=Homo sapiens GN=TMEM132C PE=2 SV=3
0.77	0.9	1	F4ZW66	F4ZW66_HUMAN	NF110b OS=Homo sapiens PE=2 SV=1
2	5.3	1	O15335	CHAD_HUMAN	Chondroadherin OS=Homo sapiens GN=CHAD PE=2 SV=2
2.12	0.6	1	O15230	LAMA5_HUMAN	Laminin subunit alpha-5 OS=Homo sapiens GN=LAMA5 PE=1 SV=8
0.86	7.3	1	A2J1N7	A2J1N7_HUMAN	Rheumatoid factor RF-ET10 (Fragment) OS=Homo sapiens PE=2 SV=1
2	2.6	1	Q7Z3X3	Q7Z3X3_HUMAN	Putative uncharacterized protein DKFZp686E12166 OS=Homo sapiens GN=DKFZp686E12166 PE=2 SV=1
0.51	1	1	A1L4H1	SRCRL_HUMAN	Soluble scavenger receptor cysteine-rich domain-containing protein SSC5D OS=Homo sapiens GN=SSC5D PE=2 SV=3
2	8.5	1	B4E0I3	B4E0I3_HUMAN	Interleukin-1 receptor-like 1 OS=Homo sapiens GN=IL1RL1 PE=2 SV=1
2.06	1.7	1	Q59G70	Q59G70_HUMAN	Mannosyl (Alpha-1,3-)-glycoprotein beta-1,2-N-acetylglucosaminyltransferase variant (Fragment) OS=Homo sapiens PE=2 SV=1
0.53	1.1	1	P08572	CO4A2_HUMAN	Collagen alpha-2(IV) chain OS=Homo sapiens GN=COL4A2 PE=1 SV=4
2	2.1	1	Q96ID5	IGS21_HUMAN	Immunoglobulin superfamily member 21 OS=Homo sapiens GN=IGSF21 PE=2 SV=1
0.58	4.4	1	Q9HAH9	Q9HAH9_HUMAN	cDNA FLJ11598 fis, clone HEMBA1003866, moderately similar to Mus musculus semaphorin VIa mRNA OS=Homo sapiens PE=2 SV=1
0.42	1.7	1	Q13421-2	MSLN_HUMAN	REVERSED Isoform 3 of Mesothelin OS=Homo sapiens GN=MSLN
2	6.5	1	Q9UNH2	Q9UNH2_HUMAN	MC51L-53L-54L homolog (Fragment) OS=Homo sapiens PE=2 SV=1
0.25	4	1	Q5VX04	Q5VX04_HUMAN	5-hydroxytryptamine receptor 7 OS=Homo sapiens GN=HTR7 PE=2 SV=1
2	7.7	1	E7ESX4	E7ESX4_HUMAN	RING-box protein 2 (Fragment) OS=Homo sapiens GN=SAG PE=2 SV=1
0.12	1	1	P86452	ZBED6_HUMAN	Zinc finger BED domain-containing protein 6 OS=Homo sapiens GN=ZBED6 PE=3 SV=1
2	0.2	1	P21817	RYR1_HUMAN	Ryanodine receptor 1 OS=Homo sapiens GN=RYR1 PE=1 SV=3
2	3.1	1	Q5VWE5	Q5VWE5_HUMAN	Neurotrophic tyrosine kinase, receptor, type 2, isoform CRA_a OS=Homo sapiens GN=NTRK2 PE=2 SV=1
2	6	1	Q8NF07	Q8NF07_HUMAN	FLJ00397 protein (Fragment) OS=Homo sapiens GN=FLJ00397 PE=2 SV=1
0.11	7.8	1	I4AY87	I4AY87_HUMAN	Macrophage migration inhibitory factor (Fragment) OS=Homo sapiens PE=2 SV=1
2	1.5	1	Q59E93	Q59E93_HUMAN	Membrane alanine aminopeptidase variant (Fragment) OS=Homo sapiens PE=2 SV=1
2	16.4	1	Q5NV82	Q5NV82_HUMAN	V4-2 protein (Fragment) OS=Homo sapiens GN=IGLV5-45 PE=1 SV=1
0.61	0.7	1	F8VY01	F8VY01_HUMAN	FYVE, RhoGEF and PH domain-containing protein 6 OS=Homo sapiens GN=FGD6 PE=2 SV=1
0.3	2.3	1	Q59FZ0	Q59FZ0_HUMAN	LAMP1 protein variant (Fragment) OS=Homo sapiens PE=2 SV=1
0.22	0.9	1	P11047	LAMC1_HUMAN	Laminin subunit gamma-1 OS=Homo sapiens GN=LAMC1 PE=1 SV=3
2	2.8	1	Q9NWT1	PK1IP_HUMAN	p21-activated protein kinase-interacting protein 1 OS=Homo sapiens GN=PAK1IP1 PE=1 SV=2
2	4.6	1	Q6LET3	Q6LET3_HUMAN	HPRT1 protein (Fragment) OS=Homo sapiens GN=HPRT1 PE=2 SV=1
2	2.7	1	Q9H955	Q9H955_HUMAN	cDNA FLJ12995 fis, clone NT2RP3000233, weakly similar to RING CANAL PROTEIN OS=Homo sapiens PE=2 SV=1
2	1.8	1	B4DNE0	B4DNE0_HUMAN	cDNA FLJ52573, highly similar to Elongation factor 1-alpha 1 OS=Homo sapiens PE=2 SV=1
2	2.9	1	J3QKW8	J3QKW8_HUMAN	Clusterin OS=Homo sapiens GN=CLUL1 PE=3 SV=1
2	16.6	1	Q5BIV9	SPRN_HUMAN	Shadow of prion protein OS=Homo sapiens GN=SPRN PE=2 SV=1
2	2.6	1	Q4VAP1	Q4VAP1_HUMAN	ZP2 protein OS=Homo sapiens GN=ZP2 PE=2 SV=1
2	1.8	1	Q86UN2	R4RL1_HUMAN	Reticulon-4 receptor-like 1 OS=Homo sapiens GN=RTN4RL1 PE=2 SV=1
2	1.7	1	Q32NF0	Q32NF0_HUMAN	TSC1 protein (Fragment) OS=Homo sapiens GN=TSC1 PE=2 SV=1
2.04	2	1	Q59EA3	Q59EA3_HUMAN	Cadherin 5, type 2 preproprotein variant (Fragment) OS=Homo sapiens PE=2 SV=1
0.11	6.7	1	A2NW98	A2NW98_HUMAN	Rheumatoid factor light chain variable region (Fragment) OS=Homo sapiens PE=2 SV=1
0.12	5.9	1	Q8WZ46	Q8WZ46_HUMAN	Zinc finger protein OS=Homo sapiens PE=2 SV=1
0.11	4.2	1	Q8NGV0	OR2Y1_HUMAN	Olfactory receptor 2Y1 OS=Homo sapiens GN=OR2Y1 PE=2 SV=1
0.17	3.8	1	Q4VC05	BCL7A_HUMAN	B-cell CLL/lymphoma 7 protein family member A OS=Homo sapiens GN=BCL7A PE=1 SV=1
2	3.8	1	Q9BUM6	Q9BUM6_HUMAN	COL6A2 protein OS=Homo sapiens PE=2 SV=1
2	1.9	1	Q68EN5	K895L_HUMAN	REVERSED Uncharacterized protein KIAA0895-like OS=Homo sapiens GN=KIAA0895L PE=2 SV=1
2	4.2	1	B1AKK2	B1AKK2_HUMAN	Dimethylarginine dimethylaminohydrolase 1, isoform CRA_b OS=Homo sapiens GN=DDAH1 PE=2 SV=1
0.27	3	1	Q9NR34	MA1C1_HUMAN	Mannosyl-oligosaccharide 1,2-alpha-mannosidase IC OS=Homo sapiens GN=MAN1C1 PE=2 SV=1
0.93	0.8	1	B1PS43	B1PS43_HUMAN	Myosin heavy chain 11 smooth muscle isoform OS=Homo sapiens GN=MYH11 PE=2 SV=1
0.13	1.7	1	B4E3Q4	B4E3Q4_HUMAN	Adenosine deaminase CECR1 OS=Homo sapiens GN=CECR1 PE=2 SV=1
2	1.7	1	F5H752	F5H752_HUMAN	Contactin-6 OS=Homo sapiens GN=CNTN6 PE=2 SV=1
2	2.1	1	Q6IBK5	Q6IBK5_HUMAN	GTF2F1 protein OS=Homo sapiens GN=GTF2F1 PE=2 SV=1
2	1	1	A6NGG8	CB071_HUMAN	Uncharacterized protein C2orf71 OS=Homo sapiens GN=C2orf71 PE=1 SV=1
2	11.1	1	O95969	SG1D2_HUMAN	Secretoglobin family 1D member 2 OS=Homo sapiens GN=SCGB1D2 PE=2 SV=1
0.3	8.6	1	E9PQS8	E9PQS8_HUMAN	Sodium channel subunit beta-3 (Fragment) OS=Homo sapiens GN=SCN3B PE=2 SV=1
0.3	4.6	1	Q53H78	Q53H78_HUMAN	Calcium/calmodulin-dependent protein kinase IIB isoform 2 variant (Fragment) OS=Homo sapiens PE=2 SV=1
2	21.9	1	H3BT58	H3BT58_HUMAN	Coactosin-like protein OS=Homo sapiens GN=COTL1 PE=2 SV=1
0.59	7.5	1	H0Y3U0	H0Y3U0_HUMAN	Parvalbumin alpha (Fragment) OS=Homo sapiens GN=PVALB PE=4 SV=1
2.01	1	1	E9PJZ7	E9PJZ7_HUMAN	REVERSED Liprin-alpha-1 OS=Homo sapiens GN=PPFIA1 PE=2 SV=1
1.77	4	1	Q5U000	Q5U000_HUMAN	Cathepsin Z OS=Homo sapiens PE=2 SV=1
1.86	2.6	1	Q86XJ5	Q86XJ5_HUMAN	JRK protein OS=Homo sapiens GN=JRK PE=2 SV=1
2	0.6	1	Q53TD9	Q53TD9_HUMAN	Putative uncharacterized protein ZFHX1B (Fragment) OS=Homo sapiens GN=ZFHX1B PE=2 SV=1
0.26	3.6	1	D6RF48	D6RF48_HUMAN	REVERSED Syntaxin-18 OS=Homo sapiens GN=STX18 PE=2 SV=1
2	14.1	1	Q6IBD2	Q6IBD2_HUMAN	CST6 protein OS=Homo sapiens GN=CST6 PE=2 SV=1
2	2.3	1	Q9H2E1	Q9H2E1_HUMAN	Neuropilin 1, isoform CRA_d OS=Homo sapiens GN=NRP1 PE=2 SV=1
2	6.6	1	Q59EU5	Q59EU5_HUMAN	Pleckstrin homology domain containing, family B (Evectins) member 1 variant (Fragment) OS=Homo sapiens PE=2 SV=1
0.47	8.3	1	I3L2X4	I3L2X4_HUMAN	Sex hormone-binding globulin OS=Homo sapiens GN=SHBG PE=2 SV=1
2	1.6	1	E7ESX1	E7ESX1_HUMAN	Chordin OS=Homo sapiens GN=CHRD PE=2 SV=1
2	3.4	1	Q8NAB7	Q8NAB7_HUMAN	cDNA FLJ35635 fis, clone SPLEN2011805, highly similar to BONE/CARTILAGE PROTEOGLYCAN I OS=Homo sapiens PE=2 SV=1
0.1	8.8	1	E9PI26	E9PI26_HUMAN	General transcription factor IIH subunit 1 OS=Homo sapiens GN=GTF2H1 PE=2 SV=1
0.13	1.9	1	B4DV64	B4DV64_HUMAN	REVERSED cDNA FLJ61420, highly similar to Homo sapiens olfactomedin 4 (OLFM4), mRNA OS=Homo sapiens PE=2 SV=1
0.09	2.1	1	B4DQ98	B4DQ98_HUMAN	cDNA FLJ55135, highly similar to Di-N-acetylchitobiase (EC 3.2.1.-) OS=Homo sapiens PE=2 SV=1
2.01	2.7	1	Q8NF20	Q8NF20_HUMAN	FLJ00382 protein (Fragment) OS=Homo sapiens GN=FLJ00382 PE=1 SV=1
2	2.3	1	O95196	CSPG5_HUMAN	Chondroitin sulfate proteoglycan 5 OS=Homo sapiens GN=CSPG5 PE=1 SV=3
1.35	3.5	1	P67936-2	TPM4_HUMAN	Isoform 2 of Tropomyosin alpha-4 chain OS=Homo sapiens GN=TPM4
0.49	3.8	1	Q9UNN8	EPCR_HUMAN	Endothelial protein C receptor OS=Homo sapiens GN=PROCR PE=1 SV=1
2	2.6	1	A8K9L8	A8K9L8_HUMAN	cDNA FLJ76964, highly similar to Homo sapiens tropomodulin 2 (neuronal) (TMOD2), mRNA OS=Homo sapiens PE=2 SV=1
0.15	2.6	1	B4DGU8	B4DGU8_HUMAN	cDNA FLJ60110, highly similar to Homo sapiens leucine-rich repeats and IQ motif containing 2 (LRRIQ2), mRNA OS=Homo sapiens PE=2 SV=1
0.18	5.6	1	K7ES54	K7ES54_HUMAN	Follistatin-related protein 3 (Fragment) OS=Homo sapiens GN=FSTL3 PE=4 SV=1
2	8	1	B4DHF1	B4DHF1_HUMAN	REVERSED cDNA FLJ61749 OS=Homo sapiens PE=2 SV=1
0.14	0.3	1	Q6ZRS2	SRCAP_HUMAN	Helicase SRCAP OS=Homo sapiens GN=SRCAP PE=1 SV=3
1.72	1.2	1	Q9UHK0	NUFP1_HUMAN	Nuclear fragile X mental retardation-interacting protein 1 OS=Homo sapiens GN=NUFIP1 PE=1 SV=2
0.07	0.1	1	Q70CQ2	UBP34_HUMAN	REVERSED Ubiquitin carboxyl-terminal hydrolase 34 OS=Homo sapiens GN=USP34 PE=1 SV=2
2	10.3	1	Q6IB11	Q6IB11_HUMAN	PGRMC1 protein OS=Homo sapiens GN=PGRMC1 PE=2 SV=1
0.52	5.9	1	Q9NZC2-2	TREM2_HUMAN	Isoform 2 of Triggering receptor expressed on myeloid cells 2 OS=Homo sapiens GN=TREM2
2	6.2	1	Q86VD6	Q86VD6_HUMAN	LOC339742 protein (Fragment) OS=Homo sapiens GN=LOC339742 PE=2 SV=1
0.11	5.1	1	Q6ZNK1	Q6ZNK1_HUMAN	FLJ00314 protein (Fragment) OS=Homo sapiens GN=FLJ00314 PE=2 SV=1
0.17	7.7	1	Q6P5T8	Q6P5T8_HUMAN	ADAM17 protein OS=Homo sapiens GN=ADAM17 PE=2 SV=1
2	2.5	1	B4DEQ8	B4DEQ8_HUMAN	cDNA FLJ60443, moderately similar to Protocadherin-8 OS=Homo sapiens PE=2 SV=1
2	7	1	C9JXB2	C9JXB2_HUMAN	Semaphorin-3G (Fragment) OS=Homo sapiens GN=SEMA3G PE=2 SV=1
2	4.4	1	G8JLH6	G8JLH6_HUMAN	CD9 antigen (Fragment) OS=Homo sapiens GN=CD9 PE=2 SV=1
0.63	2.8	1	B4DVJ0	B4DVJ0_HUMAN	Glucose-6-phosphate isomerase OS=Homo sapiens PE=2 SV=1
2	16.7	1	P01606	KV114_HUMAN	Ig kappa chain V-I region OU OS=Homo sapiens PE=1 SV=1
2	6.1	1	Q56VW5	Q56VW5_HUMAN	REVERSED Transformation-related protein 4 OS=Homo sapiens PE=2 SV=1
0.17	7.1	1	M0QZI8	M0QZI8_HUMAN	Kallikrein-11 (Fragment) OS=Homo sapiens GN=KLK11 PE=3 SV=1
2.05	2.5	1	B4DEL6	B4DEL6_HUMAN	cDNA FLJ59669, highly similar to Homo sapiens phospholipase D family, member 3 (PLD3), transcript variant 1, mRNA OS=Homo sapiens PE=2 SV=1
0.35	0.6	1	Q9P2D1	CHD7_HUMAN	Chromodomain-helicase-DNA-binding protein 7 OS=Homo sapiens GN=CHD7 PE=1 SV=3
0.14	3.5	1	Q9Y3V7	Q9Y3V7_HUMAN	Putative uncharacterized protein DKFZp586A1519 (Fragment) OS=Homo sapiens GN=DKFZp586A1519 PE=2 SV=1
2	1.6	1	B3KS46	B3KS46_HUMAN	REVERSED cDNA FLJ35454 fis, clone SMINT2004473, highly similar to Homo sapiens aarF domain containing kinase 5 (ADCK5), mRNA OS=Homo sapiens PE=2 SV=1
2	1.4	1	B4DYV8	B4DYV8_HUMAN	Roundabout homolog 4 OS=Homo sapiens GN=ROBO4 PE=2 SV=1
0.34	3.6	1	B4E1J3	B4E1J3_HUMAN	cDNA FLJ53615, highly similar to Fibromodulin OS=Homo sapiens PE=2 SV=1
2.06	3.5	1	H3BTN5	H3BTN5_HUMAN	Pyruvate kinase (Fragment) OS=Homo sapiens GN=PKM PE=2 SV=1
0.16	5.3	1	Q9NSI1	Q9NSI1_HUMAN	REVERSED HCG401283 OS=Homo sapiens GN=PRED57 PE=4 SV=1
2.12	1.4	1	E9PG71	E9PG71_HUMAN	Ephrin type-A receptor 4 OS=Homo sapiens GN=EPHA4 PE=2 SV=1
2	12.9	1	Q8N9F6	Q8N9F6_HUMAN	cDNA FLJ37453 fis, clone BRAWH2010754 OS=Homo sapiens PE=2 SV=1
0.08	0	1	D3DPG0	D3DPG0_HUMAN	Titin, isoform CRA_a OS=Homo sapiens GN=TTN PE=4 SV=1
1.75	2.5	1	F5H4W9	F5H4W9_HUMAN	Serum paraoxonase/arylesterase 1 OS=Homo sapiens GN=PON1 PE=2 SV=1
2.14	3.1	1	B4DLJ9	B4DLJ9_HUMAN	Biotinidase OS=Homo sapiens GN=BTD PE=2 SV=1
2.01	6.6	1	Q6FHW3	Q6FHW3_HUMAN	DF protein OS=Homo sapiens GN=DF PE=2 SV=1
2.01	1.1	1	Q66GS9	CP135_HUMAN	REVERSED Centrosomal protein of 135 kDa OS=Homo sapiens GN=CEP135 PE=1 SV=2
0.06	2	1	J3KRK0	J3KRK0_HUMAN	Serine/threonine-protein kinase tousled-like 2 (Fragment) OS=Homo sapiens GN=TLK2 PE=3 SV=1
2	0.4	1	Q9HCE0	EPG5_HUMAN	REVERSED Ectopic P granules protein 5 homolog OS=Homo sapiens GN=EPG5 PE=2 SV=2
0.22	1.6	1	A4D0Y6	A4D0Y6_HUMAN	G protein-coupled receptor 37 (Endothelin receptor type B-like) OS=Homo sapiens GN=GPR37 PE=2 SV=1
0.38	1.8	1	B3KMI3	B3KMI3_HUMAN	Spastic paraplegia 20, spartin (Troyer syndrome), isoform CRA_b OS=Homo sapiens GN=SPG20 PE=2 SV=1
2	2.2	1	P07205	PGK2_HUMAN	Phosphoglycerate kinase 2 OS=Homo sapiens GN=PGK2 PE=1 SV=3
0.21	2.3	1	B4DSR1	B4DSR1_HUMAN	REVERSED cDNA FLJ58730 OS=Homo sapiens PE=2 SV=1
2	3.5	1	J3KQW6	J3KQW6_HUMAN	Tripartite motif-containing protein 73 OS=Homo sapiens GN=TRIM73 PE=4 SV=1
2	1.1	1	Q8NCM2	KCNH5_HUMAN	Potassium voltage-gated channel subfamily H member 5 OS=Homo sapiens GN=KCNH5 PE=1 SV=3
1.01	8.5	1	G3V0Z9	G3V0Z9_HUMAN	HCG2043033, isoform CRA_b OS=Homo sapiens GN=LYNX1 PE=2 SV=1
2	5.2	1	J3KQY1	J3KQY1_HUMAN	REVERSED 39S ribosomal protein L22, mitochondrial OS=Homo sapiens GN=MRPL22 PE=3 SV=1
2	0.3	1	Q9UKA4	AKA11_HUMAN	A-kinase anchor protein 11 OS=Homo sapiens GN=AKAP11 PE=1 SV=1
0.2	4.6	1	Q53GA9	Q53GA9_HUMAN	Transmembrane 4 superfamily member 3 variant (Fragment) OS=Homo sapiens PE=2 SV=1
2	5.1	1	B3KNT3	B3KNT3_HUMAN	Steroid receptor RNA activator 1, isoform CRA_a OS=Homo sapiens GN=SRA1 PE=2 SV=1
0.51	3.5	1	A1XBS5	F92A1_HUMAN	Protein FAM92A1 OS=Homo sapiens GN=FAM92A1 PE=2 SV=2
0.48	0.4	1	H7BZ41	H7BZ41_HUMAN	Lipoxygenase homology domain-containing protein 1 OS=Homo sapiens GN=LOXHD1 PE=4 SV=2
2	2.1	1	B7ZMD6	B7ZMD6_HUMAN	IRGQ protein OS=Homo sapiens GN=IRGQ PE=2 SV=1
0.25	1.5	1	D6RDG4	D6RDG4_HUMAN	REVERSED Centrosomal protein POC5 OS=Homo sapiens GN=POC5 PE=2 SV=1
0.46	0.1	1	Q8WXI7	MUC16_HUMAN	Mucin-16 OS=Homo sapiens GN=MUC16 PE=1 SV=2
0.22	0.9	1	Q9BYX2	TBD2A_HUMAN	TBC1 domain family member 2A OS=Homo sapiens GN=TBC1D2 PE=1 SV=3
0.2	9.5	1	P61278	SMS_HUMAN	Somatostatin OS=Homo sapiens GN=SST PE=1 SV=1
0.21	6	1	C9JR52	C9JR52_HUMAN	Pleiotrophin OS=Homo sapiens GN=PTN PE=2 SV=1
2	0.6	1	Q86W24	NAL14_HUMAN	NACHT, LRR and PYD domains-containing protein 14 OS=Homo sapiens GN=NLRP14 PE=2 SV=1
2	5	1	D3DVS7	D3DVS7_HUMAN	DNA segment on chromosome 4 (Unique) 234 expressed sequence, isoform CRA_a OS=Homo sapiens GN=D4S234E PE=2 SV=1
0.1	0.5	1	D3YTG3	D3YTG3_HUMAN	Target of Nesh-SH3 OS=Homo sapiens GN=ABI3BP PE=2 SV=1
0.2	4	1	H7C1Q2	H7C1Q2_HUMAN	REVERSED SET domain-containing protein 5 (Fragment) OS=Homo sapiens GN=SETD5 PE=4 SV=1
2	2.2	1	A8MUV8	ZN727_HUMAN	Putative zinc finger protein 727 OS=Homo sapiens GN=ZNF727 PE=5 SV=3
2	0.7	1	Q7Z2Z1	TICRR_HUMAN	Treslin OS=Homo sapiens GN=TICRR PE=1 SV=2
0.49	10	1	P81605	DCD_HUMAN	Dermcidin OS=Homo sapiens GN=DCD PE=1 SV=2
2	2	1	Q5TA95	Q5TA95_HUMAN	Tetratricopeptide repeat domain 4, isoform CRA_a OS=Homo sapiens GN=TTC4 PE=2 SV=1
0.06	0.2	1	B1WB49	B1WB49_HUMAN	BDP1 protein (Fragment) OS=Homo sapiens GN=BDP1 PE=2 SV=1
0.2	1.9	1	P23352	KALM_HUMAN	Anosmin-1 OS=Homo sapiens GN=KAL1 PE=1 SV=3
0.2	5.7	1	L8E8V8	L8E8V8_HUMAN	REVERSED Alternative protein C1orf106 OS=Homo sapiens GN=C1orf106 PE=4 SV=1
0.2	1.2	1	P35251	RFC1_HUMAN	Replication factor C subunit 1 OS=Homo sapiens GN=RFC1 PE=1 SV=4
0.18	0.5	1	Q149M9-3	NWD1_HUMAN	REVERSED Isoform 3 of NACHT and WD repeat domain-containing protein 1 OS=Homo sapiens GN=NWD1
0.3	4.7	1	Q8TBP5	F174A_HUMAN	Membrane protein FAM174A OS=Homo sapiens GN=FAM174A PE=2 SV=1
0.86	13.6	1	H3BQX6	H3BQX6_HUMAN	Metallothionein OS=Homo sapiens GN=MT3 PE=2 SV=1
0.19	1.2	1	A8K1Z4	A8K1Z4_HUMAN	cDNA FLJ76704, highly similar to Homo sapiens leukemia inhibitory factor receptor (LIFR), mRNA OS=Homo sapiens PE=2 SV=1
0.43	14.5	1	L0R8D2	L0R8D2_HUMAN	Alternative protein RCOR1 OS=Homo sapiens GN=RCOR1 PE=4 SV=1
2	2.7	1	B5A940	B5A940_HUMAN	Soluble MET variant 12 OS=Homo sapiens GN=MET PE=2 SV=1
2	6	1	Q53HE2	Q53HE2_HUMAN	Triosephosphate isomerase (Fragment) OS=Homo sapiens PE=2 SV=1
0.06	0.6	1	R4GNA2	R4GNA2_HUMAN	REVERSED Ankyrin repeat domain-containing protein 30A OS=Homo sapiens GN=ANKRD30A PE=4 SV=1
2	1.6	1	B3KPF3	B3KPF3_HUMAN	REVERSED cDNA FLJ31722 fis, clone NT2RI2006679, highly similar to Homo sapiens follistatin-like 4 (FSTL4), mRNA OS=Homo sapiens PE=2 SV=1
0.05	0.6	1	Q9BZQ8	NIBAN_HUMAN	REVERSED Protein Niban OS=Homo sapiens GN=FAM129A PE=1 SV=1
1.41	2	1	Q7Z7B1	PIGW_HUMAN	REVERSED Phosphatidylinositol-glycan biosynthesis class W protein OS=Homo sapiens GN=PIGW PE=2 SV=1
0.16	2	1	B3KWF4	B3KWF4_HUMAN	cDNA FLJ42944 fis, clone BRSTN2004863, highly similar to PolypeptideN-acetylgalactosaminyltransferase 11 (EC 2.4.1.41) OS=Homo sapiens PE=2 SV=1
0.46	2.3	1	B4DVX1	B4DVX1_HUMAN	cDNA FLJ56555, highly similar to Wiskott-Aldrich syndrome protein-interacting protein OS=Homo sapiens PE=2 SV=1
2	1.2	1	Q15283	RASA2_HUMAN	REVERSED Ras GTPase-activating protein 2 OS=Homo sapiens GN=RASA2 PE=2 SV=3
0.26	2.3	1	Q92743	HTRA1_HUMAN	Serine protease HTRA1 OS=Homo sapiens GN=HTRA1 PE=1 SV=1
2	14.1	1	Q6FHK1	Q6FHK1_HUMAN	MRPL28 protein (Fragment) OS=Homo sapiens GN=MRPL28 PE=2 SV=1
2	5.7	1	F8WFD9	F8WFD9_HUMAN	Protein shisa-5 OS=Homo sapiens GN=SHISA5 PE=2 SV=1
2	10.7	1	H3BQD0	H3BQD0_HUMAN	Cerebellin OS=Homo sapiens GN=CBLN1 PE=2 SV=1
0.08	0.9	1	Q5SSJ5	HP1B3_HUMAN	Heterochromatin protein 1-binding protein 3 OS=Homo sapiens GN=HP1BP3 PE=1 SV=1
2	1.3	1	H0Y4I5	H0Y4I5_HUMAN	Chondroadherin-like protein (Fragment) OS=Homo sapiens GN=CHADL PE=4 SV=1
2	3.3	1	B4E2S7	B4E2S7_HUMAN	Lysosome-associated membrane glycoprotein 2 OS=Homo sapiens GN=LAMP2 PE=2 SV=1
2.1	10.7	1	A2NJV5	A2NJV5_HUMAN	Kappa light chain variable region (Fragment) OS=Homo sapiens GN=IGKV A18 PE=4 SV=1
2	6.3	1	F1T0L6	F1T0L6_HUMAN	Complexin 4, isoform CRA_b OS=Homo sapiens GN=CPLX4 PE=2 SV=1
0.74	5.3	1	Q9H2P1	Q9H2P1_HUMAN	DC16 OS=Homo sapiens PE=2 SV=1
0.54	1	1	Q59FU1	Q59FU1_HUMAN	Protein tyrosine phosphatase, receptor type, N variant (Fragment) OS=Homo sapiens PE=2 SV=1
2	1	1	Q6PCC8	Q6PCC8_HUMAN	URB2 protein (Fragment) OS=Homo sapiens GN=URB2 PE=2 SV=1
